# Supplementary material for: Studying the reactivity of alkyl substituted BODIPYs: first enantioselective addition of BODIPY to MBH carbonates
Source: PubMed Central journal article supplement — Chem Sci. 2021 Feb 5;12(12):4503–8. doi: 10.1039/d0sc06574a (PMC8179495; doi:10.1039/d0sc06574a), 2021-02-05
Supplement: SC-012-D0SC06574A-s001.pdf [file SC-012-D0SC06574A-s001.pdf]

## **Studying the reactivity of alkyl substituted BODIPY. First enantioselective addition of BODIPY to MBH carbonates.**

Marta Meazza, Carlos M. Cruz, Ana M. Ortuño, Juan M. Cuerva, Luis Crovetto\* and Ramon Rios\*

### **Table of Contents**

|                                                          |    |
|----------------------------------------------------------|----|
| General information .....                                | 2  |
| Synthesis of the starting materials .....                | 2  |
| Table S1: Optimization table .....                       | 3  |
| General procedure for the stereoselective reaction ..... | 4  |
| Final products characterization .....                    | 4  |
| NMR spectra .....                                        | 17 |
| HPLC traces .....                                        | 46 |
| Crystal of racemic 3d .....                              | 73 |
| Photophysical properties .....                           | 78 |

## General information

Thin layer chromatography (TLC) was performed on Mark TLC Silicagel 60 F254. Product marks were visualized by UV-light at 254 nm and potassium permanganate stain. Flash column chromatography was effectuated using silica gel (Geduran Si60, 40-63 $\mu$ m).  $^1\text{H-NMR}$ ,  $^{13}\text{C-NMR}$ ,  $^{19}\text{F-NMR}$ , 2D-NMR were recorded with a Bruker DPX400 NMR. Chemical shifts ( $\delta$ ) are reported in ppm relative to residual solvent signals ( $\text{CHCl}_3$ , 7.26 ppm for  $^1\text{H}$  NMR;  $\text{CDCl}_3$ , 77.15 ppm for  $^{13}\text{C}$  NMR). Optical rotations were performed on an Optical Activity PolAar 2001 machine. High resolution mass spectrometer equipped with a Time of Flight (TOF) analyzer. The HPLC analysis were performed on an Agilent 1220 Infinity LC system HPLC. All analytical grade solvents and commercially available reagents were purchased from Sigma-Aldrich, Alfa-Aesar and Fluorochem and used as received without further purification.

## Synthesis of the starting materials

Bodipys were synthesised using modified general procedures reported in the literature.<sup>1</sup>

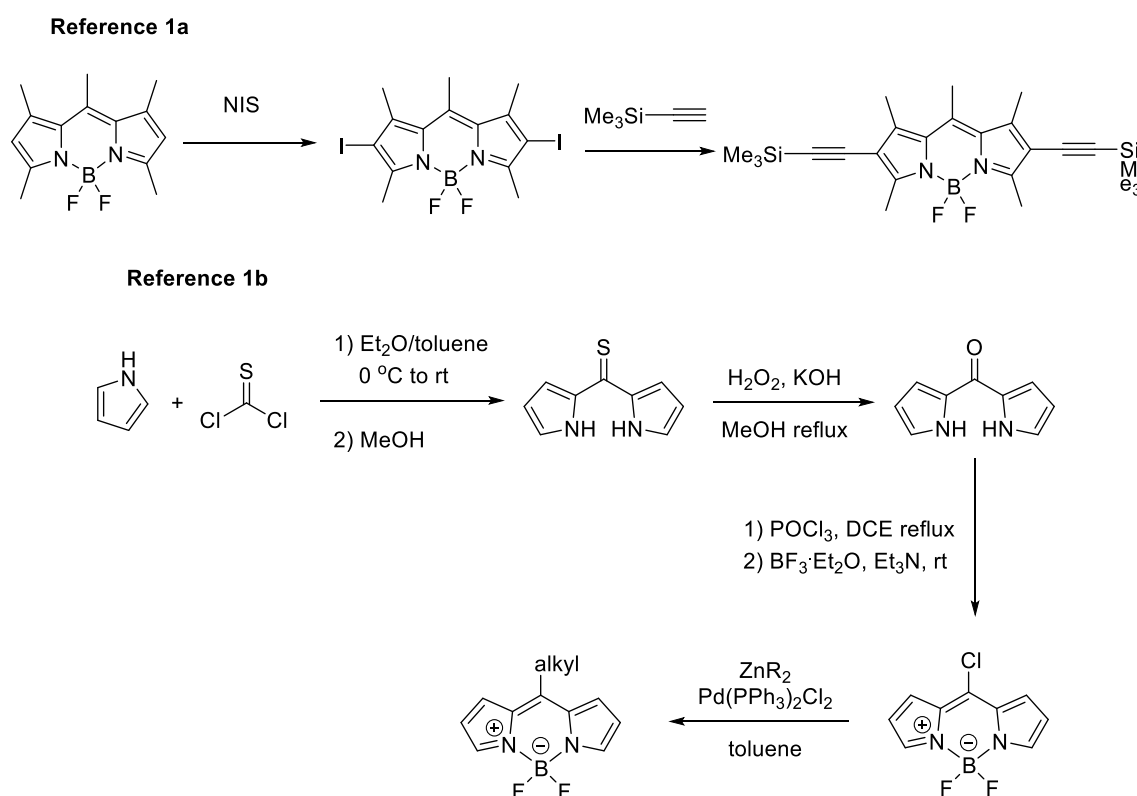

**Scheme S1:** Compound 1 general Synthesis

1 <sup>1</sup>a) M. Morisue, M. Kawanishi and S. Nakano, *J. Polymer Sci. A*, 2019, **57**, 2457-2465; b) E. Palao, G. Duran-Sampedro, S. de la Moya, M. Madrid, C. García-López, A. R. Agarrabeitia, B. Verbelen, W. Dehaen, N. Boens and M. J. Ortiz, *J. Org. Chem.* 2016, **81**, 3700.

**Table S1: Optimization table**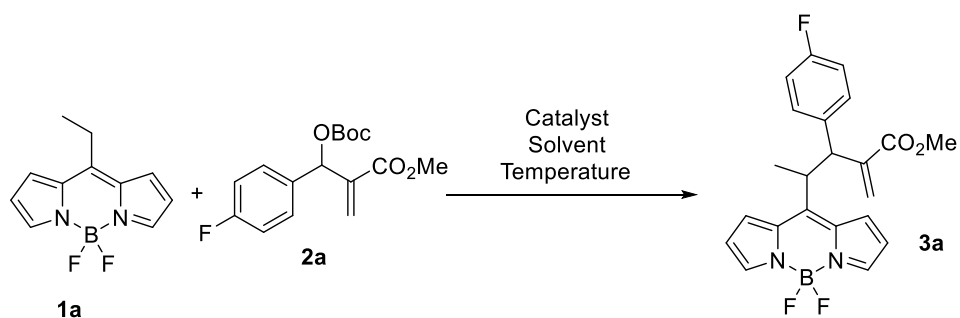

HPLC separation: **IE 90:10** (23 min and 25 min)

| Entry | Ratio | Catalyst                     | Solvent           | temperature | conversion                                    | ee         |
|-------|-------|------------------------------|-------------------|-------------|-----------------------------------------------|------------|
| 1     | 1:1   | DABCO 40%                    | CHCl <sub>3</sub> | rt          | 1 d: full                                     | Rac        |
| 2     | 1:1   | (DHQD) <sub>2</sub> PHAL 20% | CHCl <sub>3</sub> | rt          | 1 d: no conv<br>4 d: 23%                      | 11         |
| 3     | 1:1   | β-isocupreidine 20%          | CHCl <sub>3</sub> | rt          | 1 d: full                                     | 13         |
| 4     | 1:2   | Quinine 20%                  | CHCl <sub>3</sub> | rt          | 1 d: 12%<br>3 d: 40%<br>7 d: 65%<br>11 d: 79% | +88        |
| 5     | 1:1   | Quinidine 20%                | CHCl <sub>3</sub> | rt          | 1 d: 13%<br>6 d: 70%<br>10 d: 86%             | -90        |
| 6     | 1:1   | Cinchonine 20%               | CHCl <sub>3</sub> | rt          | 1 d: 21%<br>6 d: 91%                          | -89-<br>88 |
| 7     | 1:1   | Cinchonidine aldehyde 20%    | CHCl <sub>3</sub> | rt          | 1 d: 13%<br>6 d: 77%<br>10 d: >90%            | +71        |
| 8     | 1:1   | Cinchonine 20%               | Toluene           | rt          | 0                                             | -          |
| 9     | 1:1   | Cinchonine 20%               | trifluorotoluene  | rt          | 0                                             | -          |
| 10    | 1:1   | Cinchonine 20%               | ACN               | rt          | Traces                                        | -          |
| 11    | 1:1   | Cinchonine 20%               | THF               | rt          | 5 d: 45%                                      | -48        |
| 12    | 1:1   | Cinchonine 20%               | DCE               | rt          | 1 d: 0%<br>4 d: 23%                           | -77        |
| 13    | 1:2   | Cinchonine 20%               | CHCl <sub>3</sub> | rt          | 1 d: 22%<br>4 d: full                         | -88        |
| 14    | 1:2   | Quinidine 20%                | CHCl <sub>3</sub> | rt          | 1 d: 0<br>4 d: 34%                            | -89        |
| 15    | 1:2   | Cinchonidine 20%             | CHCl <sub>3</sub> | rt          | 1 d: 25%<br>3 d: 90%<br>4 d: full             | +79        |
| 16    | 1:2   | Cinchonine 20%               | CHCl <sub>3</sub> | 4           | 1 d: 0                                        | -          |
| 17    | 1:2   | Cinchonidine 20%             | CHCl <sub>3</sub> | 4           | 1 d: 26%                                      | +76        |

## General procedure for the stereoselective reaction

In a closed vial were added: the organic catalyst quinine, cinchonine or cinchonidine (20 mol%), the bodipy (0.05 mmol, 1 equiv) the Morita-Baylis-Hillman carbonate (2 equiv), and chloroform (1 ml) and stirred at rt for 2-10 days, monitored by  $^1\text{H-NMR}$ . The crude was purified by flash column chromatography (*n*-hexane/EtOAc) to obtain the desired product.

### Scale up Reaction (1g scale)

In a round bottom flask 1g of **1a** (4.5 mmols) were added in 100 mL of  $\text{CHCl}_3$ . Next, 2.97g of **2b** (2 equiv., 9 mmols) and 0.295g of quinine (0.2 equiv, 0.9 mmols) were added and the reaction was stirred for 7 days until completion of **1a** (NMR monitored). The crude reaction was purified by flash chromatography achieving 1.85 g of **3b** (95% yield, 88% ee).

## Final products characterization

**methyl (3*S*,4*S*)-4-(5,5-difluoro-5*H*-4 $\lambda^4$ ,5 $\lambda^4$ -dipyrrolo[1,2-*c*:2',1'-*f*][1,3,2]diazaborinin-10-yl)-3-(4-fluorophenyl)-2-methylenepentanoate, 3a**

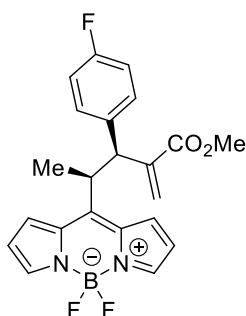

Following the general procedure the product was obtained after 4 days in 87% yield with quinine and >99% yield with cinchonine as a red foam.  $^1\text{H NMR}$  (400 MHz,  $\text{CDCl}_3$ )  $\delta$  7.74 (s, 2H), 7.68 – 7.57 (bs, 1H), 7.38 – 7.22 (bs, 1H), 7.01 – 6.94 (m, 2H), 6.76 – 6.68 (m, 2H), 6.62 – 6.53 (bs, 1H), 6.51 (s, 1H), 6.46 – 6.37 (bs, 1H), 5.93 (s, 1H), 4.61 (d,  $J = 12.0$  Hz, 1H), 4.04 – 3.93 (m, 1H), 3.77 (s, 3H), 1.58 (d,  $J = 7.0$  Hz, 3H).  $^{13}\text{C NMR}$  (101 MHz,  $\text{CDCl}_3$ )  $\delta$  167.3, 162.9, 160.5, 153.7, 144.9 (bs), 142.1 (bs), 141.6, 136.1 (bs), 135.5, 135.4, 133.1 (bs), 129.8, 129.7, 128.8, 126.0, 118.0, 115.4, 115.2, 53.5, 52.5, 41.4, 21.9.  $^{19}\text{F NMR}$  (376 MHz,  $\text{CDCl}_3$ )  $\delta$  -115.4 (s, 1F), -145.9 (dq,  $J = 57.5, 28.0$  Hz, 1F), -146.7 (dq,  $J = 57.5, 28.0$  Hz, 1F).  $[\alpha]_{\text{D}}^{25} = +479.4^\circ$  ( $c = 0.25$ ,  $\text{CHCl}_3$ ) quinine,  $[\alpha]_{\text{D}}^{25} = -432.7^\circ$  ( $c = 0.6$ ,  $\text{CHCl}_3$ ) cinchonine. **HRMS (ESI+)**: Exact mass calculated for  $\text{C}_{22}\text{H}_{21}\text{BF}_3\text{N}_2\text{O}_2$   $[\text{M}+\text{H}]^+$ : 413.1643, found: 413.1645. The enantiomeric excess was determined by **HPLC** using a Chiralpak IE column, hexane/*i*PrOH = 90:10, flow rate 1.0 mL/min,  $\lambda = 210$  nm:  $t_{\text{r}} = 23.6, 25.8$ , 86% ee quinine and 83% ee cinchonine.



**methyl (3*S*,4*S*)-3-(4-chlorophenyl)-4-(5,5-difluoro-5*H*-4 $\lambda^4$ ,5 $\lambda^4$ -dipyrrolo[1,2-*c*:2',1'-*f*][1,3,2]diazaborinin-10-yl)-2-methylenepentanoate, 3b**

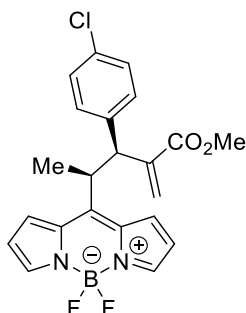

Following the general procedure the product was obtained after 6 days in >99% yield with quinine and 89% yield with cinchonine as a red foam.  $^1\text{H NMR}$  (400 MHz,  $\text{CDCl}_3$ )  $\delta$  7.75 (s, 2H), 7.70 - 7.55 (bs, 1H), 7.36 - 7.25 (bs, 1H), 7.04 - 6.94 (m, 4H), 6.62 - 6.51 (bs, 1H), 6.50 (s, 1H), 6.49 - 6.40 (bs, 1H), 5.92 (s, 1H), 4.61 (d,  $J = 12.0$  Hz, 1H), 4.04 - 3.96 (m, 1H), 3.79 (s, 3H), 1.58 (d,  $J = 7.0$  Hz, 3H).  $^{13}\text{C NMR}$  (101 MHz,  $\text{CDCl}_3$ )  $\delta$  167.2, 153.5, 145.0 (bs), 142.3 (bs), 141.5, 138.3, 133.0 (bs), 129.6, 128.8 (bs), 128.6, 126.3, 118.1 (bs), 53.6, 52.5, 41.2, 22.0.  $^{19}\text{F NMR}$  (376 MHz,  $\text{CDCl}_3$ ) -145.7 (dq,  $J = 55.0, 27.7$  Hz, 1F), -146.9 (dq,  $J = 55.0, 27.7$  Hz, 1F).  $[\alpha]_{\text{D}}^{25} = +449.2^\circ$  ( $c = 0.3$ ,  $\text{CHCl}_3$ ) quinine,  $[\alpha]_{\text{D}}^{25} = -394.7^\circ$  ( $c = 0.3$ ,  $\text{CHCl}_3$ ) cinchonine. **HRMS (ESI+)**: Exact mass calculated for  $\text{C}_{22}\text{H}_{21}\text{BClF}_2\text{N}_2\text{O}_2$   $[\text{M}+\text{H}]^+$ : 429.1347, found: 429.1343. The enantiomeric excess was determined by **HPLC** using a Chiralpak IE column, hexane/*i*PrOH = 90:10, flow rate 1.0 mL/min,  $\lambda = 210$  nm:  $t_{\text{r}} = 24.6, 26.5$ , 89% ee quinine and 92% ee cinchonine.

**methyl (3*S*,4*S*)-3-(4-bromophenyl)-4-(5,5-difluoro-5*H*-4 $\lambda^4$ ,5 $\lambda^4$ -dipyrrolo[1,2-*c*:2',1'-*f*][1,3,2]diazaborinin-10-yl)-2-methylenepentanoate, 3c**

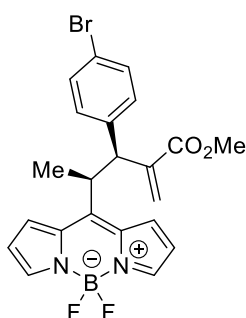

Following the general procedure the product was obtained after 7 days and 97% yield with quinine and 3 days and 93% yield with cinchonine as a red foam.  $^1\text{H NMR}$  (400 MHz,  $\text{CDCl}_3$ )  $\delta$  7.75 (s, 2H), 7.67 - 7.56 (bs, 1H), 7.36 - 7.26 (bs, 1H), 7.18 - 7.15 (m, 2H), 6.93 - 6.89 (m, 2H), 6.62 - 6.49 (bs, 1H), 6.50 (s, 1H), 6.50 - 6.39 (bs, 1H), 5.92 (s, 1H), 4.60 (d,  $J = 12.0$  Hz, 1H), 4.06 - 3.96 (m, 1H), 3.77 (s, 3H), 1.58 (d,  $J = 7.0$  Hz, 3H).  $^{13}\text{C NMR}$  (101 MHz,  $\text{CDCl}_3$ )  $\delta$  167.2, 153.4, 145.0 (bs), 142.2 (bs), 141.4, 138.9, 136.0 (bs), 133.2 (bs), 131.6, 129.9, 128.8 (bs), 126.3, 121.2, 118.1 (bs), 54.0, 52.5, 41.4, 22.0.  $^{19}\text{F NMR}$  (376

**MHz, CDCl<sub>3</sub>**)  $\delta$  -145.7 (dq,  $J$  = 57.7, 29.7 Hz, 1F), -146.9 (dq,  $J$  = 57.7, 29.7 Hz, 1F).  $[\alpha]_D^{25}$  = +97.4° ( $c$  = 0.3, CHCl<sub>3</sub>) quinine,  $[\alpha]_D^{25}$  = -375.3° ( $c$  = 0.5, CHCl<sub>3</sub>) cinchonine. **HRMS (ESI+)**: Exact mass calculated for C<sub>22</sub>H<sub>21</sub>BBrF<sub>2</sub>N<sub>2</sub>O<sub>2</sub> [M+H]<sup>+</sup>: 473.0842, found: 473.0846. The enantiomeric excess was determined by **HPLC** using a Chiralpak IE column, hexane/iPrOH = 90:10, flow rate 1.0 mL/min,  $\lambda$  = 210 nm:  $t_r$  = 26.2, 28.2, 91% ee quinine and 90% ee cinchonine.

**methyl (3S,4S)-4-(5,5-difluoro-5H-4 $\lambda^4$ ,5 $\lambda^4$ -dipyrrolo[1,2-c:2',1'-f][1,3,2]diazaborinin-10-yl)-2-methylene-3-phenylpentanoate, 3d**

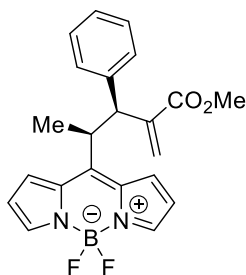

Following the general procedure the product was obtained after 8 days in >99% yield with quinine and >99% yield with cinchonine as a red foam. **<sup>1</sup>H NMR (400 MHz, CDCl<sub>3</sub>)**  $\delta$  7.72 (s, 2H), 7.70 - 7.60 (bs, 1H), 7.35 - 7.20 (bs, 1H), 7.05 - 6.95 (m, 5H), 6.65 - 6.55 (bs, 1H), 6.51 (s, 1H), 6.48 - 6.26 (bs, 1H), 5.95 (s, 1H), 4.64 (d,  $J$  = 11.9 Hz, 1H), 4.01 (dq,  $J$  = 11.9, 7.0 Hz, 1H), 3.77 (s, 3H), 1.59 (d,  $J$  = 7.0 Hz, 3H). **<sup>13</sup>C NMR (101 MHz, CDCl<sub>3</sub>)**  $\delta$  167.4, 154.0, 144.6 (bs), 142.0 (bs), 141.7, 139.7, 136.1 (bs) 133.3 (bs), 128.9 (bs), 128.4, 128.3, 127.2, 126.0, 117.9 (bs), 54.0, 52.4, 41.6, 21.9. **<sup>19</sup>F NMR (376 MHz, CDCl<sub>3</sub>)**  $\delta$  -145.9 (dq,  $J$  = 56.4, 28.1 Hz, 1F), -146.8 (dq,  $J$  = 56.4, 28.1 Hz, 1F).  $[\alpha]_D^{25}$  = +449.2° ( $c$  = 0.3, CHCl<sub>3</sub>) quinine,  $[\alpha]_D^{25}$  = -394.7° ( $c$  = 0.3, CHCl<sub>3</sub>) cinchonine. **HRMS (ESI+)**: Exact mass calculated for C<sub>22</sub>H<sub>22</sub>BF<sub>2</sub>N<sub>2</sub>O<sub>2</sub> [M+H]<sup>+</sup>: 395.1737, found: 395.1739. The enantiomeric excess was determined by **HPLC** using a Chiralpak IE column, hexane/iPrOH = 90:10, flow rate 1.0 mL/min,  $\lambda$  = 210 nm:  $t_r$  = 24.9, 26.4, 86% ee quinine and 83% ee cinchonine.

**methyl (3S,4S)-4-(5,5-difluoro-5H-4 $\lambda^4$ ,5 $\lambda^4$ -dipyrrolo[1,2-c:2',1'-f][1,3,2]diazaborinin-10-yl)-2-methylene-3-(*p*-tolyl)pentanoate, 3e**

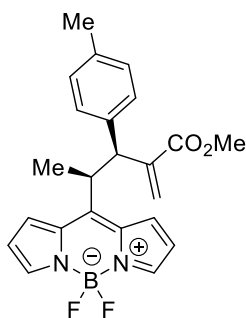

Following the general procedure the product was obtained after 6 days in >99% yield with quinine and >99% yield with cinchonine as a red foam.  $^1\text{H NMR}$  (400 MHz,  $\text{CDCl}_3$ )  $\delta$  7.73 (s, 2H), 7.72 - 7.60 (bs, 1H), 7.45 - 7.25 (bs, 1H), 6.91 (d,  $J = 8.1$  Hz, 2H), 6.84 (d,  $J = 8.1$  Hz, 2H), 6.63 - 6.52 (bs, 1H), 6.47 (s, 1H), 6.45 - 6.34 (bs, 1H), 5.92 (s, 1H), 4.63 (d,  $J = 11.9$  Hz, 1H), 4.08 - 3.98 (m, 1H), 3.76 (s, 3H), 2.13 (s, 3H), 1.57 (d,  $J = 7.0$  Hz, 3H).  $^{13}\text{C NMR}$  (101 MHz,  $\text{CDCl}_3$ )  $\delta$  167.5, 154.3, 144.4 (bs), 142.2, 141.9 (bs), 137.8, 136.7, 129.1, 128.9 (bs), 128.1, 125.8, 117.9 (bs), 53.5, 52.4, 41.6, 22.2, 21.0.  $^{19}\text{F NMR}$  (376 MHz,  $\text{CDCl}_3$ )  $\delta$  -145.4 (m, 1F), -147.1 (m, 1F).  $[\alpha]_{\text{D}}^{25} = +446.9^\circ$  ( $c = 0.4$ ,  $\text{CHCl}_3$ ) quinine,  $[\alpha]_{\text{D}}^{25} = -392.6^\circ$  ( $c = 0.4$ ,  $\text{CHCl}_3$ ) cinchonine. **HRMS (ESI+)**: Exact mass calculated for  $\text{C}_{23}\text{H}_{24}\text{BF}_2\text{N}_2\text{O}_2$   $[\text{M}+\text{H}]^+$ : 409.1893, found: 409.1899. The enantiomeric excess was determined by **HPLC** using a Chiralpak IE column, hexane/*i*PrOH = 90:10, flow rate 1.0 mL/min,  $\lambda = 210$  nm:  $t_{\text{r}} = 23.4, 24.9$ , 86% ee quinine and 88% ee cinchonine.

**methyl (3*S*,4*S*)-4-(5,5-difluoro-5*H*-4 $\lambda^4$ ,5 $\lambda^4$ -dipyrrolo[1,2-*c*:2',1'-*f*][1,3,2]diazaborinin-10-yl)-2-methylene-3-(4-nitrophenyl)pentanoate, 3f**

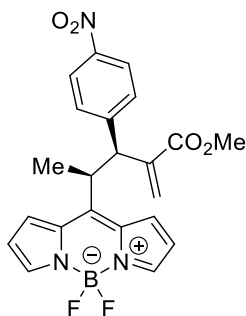

Following the general procedure the product was obtained after 2 days in >99% yield with quinine and >99% yield with cinchonine as a red foam.  $^1\text{H NMR}$  (400 MHz,  $\text{CDCl}_3$ )  $\delta$  7.94 - 7.87 (m, 2H), 7.75 (bs, 2H), 7.70 - 7.65 (bs, 1H), 7.45 - 7.25 (bs, 1H), 7.24 - 7.19 (m, 2H), 6.65 - 6.56 (bs, 1H), 6.57 (s, 1H), 6.53 - 6.40 (bs, 1H), 6.00 (s, 1H), 4.72 (d,  $J = 12.0$  Hz, 1H), 4.07 (dq,  $J = 12.0, 7.0$  Hz, 1H), 3.78 (s, 3H), 1.62 (d,  $J = 7.0$  Hz, 3H).  $^{13}\text{C NMR}$  (101 MHz,  $\text{CDCl}_3$ )  $\delta$  166.8, 152.4, 147.3, 146.9, 145.5 (bs), 142.6 (bs), 140.6, 135.9 (bs), 133.0 (bs), 129.2, 128.7 (bs), 127.2, 123.6, 118.4 (bs), 52.4, 52.6, 40.7, 21.8.  $^{19}\text{F NMR}$  (376 MHz,  $\text{CDCl}_3$ )  $\delta$  -146.4 (m, 2F).  $[\alpha]_{\text{D}}^{25} = +512.2^\circ$  ( $c = 0.4$ ,  $\text{CHCl}_3$ ) quinine,  $[\alpha]_{\text{D}}^{25} = -24.8^\circ$  ( $c = 0.25$ ,  $\text{CHCl}_3$ ) cinchonine. **HRMS (ESI+)**: Exact mass calculated for  $\text{C}_{22}\text{H}_{21}\text{BF}_2\text{N}_3\text{O}_4$   $[\text{M}+\text{H}]^+$ : 440.1588, found: 440.1594. The enantiomeric excess was determined by **HPLC** using a Chiralpak IE column, hexane/*i*PrOH = 90:10, flow rate 1.0 mL/min,  $\lambda = 210$  nm:  $t_{\text{r}} = 67.8, 75.5$ , 89% ee quinine and 87% ee cinchonine.

**methyl (3*S*,4*S*)-4-(5,5-difluoro-5*H*-4 $\lambda^4$ ,5 $\lambda^4$ -dipyrrolo[1,2-*c*:2',1'-*f*][1,3,2]diazaborinin-10-yl)-2-methylene-3-(4-trifluoromethyl)phenyl)pentanoate, 3g**

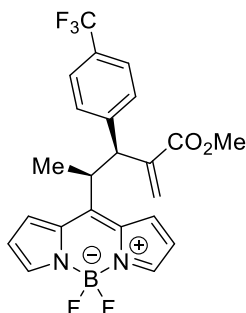

Following the general procedure the product was obtained after 9 days in >99% yield with cinchonine and 48% yield with cinchonidine as a red foam.  $^1\text{H NMR}$  (400 MHz,  $\text{CDCl}_3$ )  $\delta$  7.75 (s, 2H), 7.70 - 7.55 (bs, 1H), 7.35 - 7.27 (bs, 1H), 7.31 (d,  $J = 8.2$  Hz, 2H), 7.16 (d,  $J = 8.2$  Hz, 2H), 6.64 - 6.52 (bs, 1H), 6.55 (s, 1H), 6.53 - 6.38 (bs, 1H), 5.96 (s, 1H), 4.69 (d,  $J = 12.0$  Hz, 1H), 4.04 (dq,  $J = 12.0, 7.0$  Hz, 1H), 3.79 (s, 3H), 1.60 (d,  $J = 7.0$  Hz, 3H).  $^{13}\text{C NMR}$  (101 MHz,  $\text{CDCl}_3$ )  $\delta$  167.1, 153.0, 145.1 (bs), 143.8, 142.4 (bs), 141.0, 136.0 (bs), 133.0 (bs), 129.5, 129.2, 128.9, 128.8 (bs), 128.6, 126.8, 125.4 (q), 122.6, 118.2 (bs), 53.9, 52.6, 41.0, 21.9.  $^{19}\text{F NMR}$  (376 MHz,  $\text{CDCl}_3$ )  $\delta$  -63.7 (s, 3F), -146.7 (dq,  $J = 58.4, 29.1$  Hz, 1F), -147.9 (dq,  $J = 58.4, 29.1$  Hz, 1F).  $[\alpha]_{\text{D}}^{25} = -353.3^\circ$  ( $c = 0.4$ ,  $\text{CHCl}_3$ ) cinchonine,  $[\alpha]_{\text{D}}^{25} = +245.5^\circ$  ( $c = 0.2$ ,  $\text{CHCl}_3$ ) cinchonidine. **HRMS (ESI+)**: Exact mass calculated for  $\text{C}_{23}\text{H}_{21}\text{BF}_5\text{N}_2\text{O}_2$   $[\text{M}+\text{H}]^+$ : 463.1611, found: 463.1619. The enantiomeric excess was determined by **HPLC** using a Chiralpak IE column, hexane/*i*PrOH = 90:10, flow rate 1.0 mL/min,  $\lambda = 210$  nm:  $t_{\text{r}} = 17.3, 19.0$ , 77% ee cinchonine and 37% ee cinchonidine.

**methyl (3*R*,4*S*)-3-(2-chlorophenyl)-4-(5,5-difluoro-5*H*-4 $\lambda^4$ ,5 $\lambda^4$ -dipyrrolo[1,2-*c*:2',1'-*f*][1,3,2]diazaborinin-10-yl)-2-methylenepentanoate, 3h**

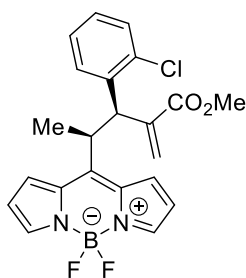

Following the general procedure the product was obtained after 6 days in >99% yield with quinine and >99% yield with cinchonine as a red foam.  $^1\text{H NMR}$  (400 MHz,  $\text{CDCl}_3$ )  $\delta$  7.74 (s, 2H), 7.70 - 7.54 (bs, 2H), 7.47 - 7.45 (m, 1H), 7.17 - 7.13 (m, 1H), 7.03 - 6.69 (m, 2H), 6.53 - 6.51 (m, 2H), 6.44 (s, 1H), 5.90 (s, 1H), 5.21 (d,  $J = 12.0$  Hz, 1H), 4.29 (dq,  $J = 12.0, 7.0$  Hz, 1H), 3.81 (s, 3H), 1.58 (d,  $J = 7.0$  Hz, 3H).  $^{13}\text{C NMR}$  (101 MHz,  $\text{CDCl}_3$ )  $\delta$  167.2, 153.8 (bs), 143.5 (bs), 143.2, 140.6 (bs), 137.1, 134.2, 130.1, 129.4 (bs),

128.9, 128.4, 126.7, 118.1 (bs), 52.4, 49.6, 40.6, 22.7.  $^{19}\text{F}$  NMR (376 MHz,  $\text{CDCl}_3$ )  $\delta$  -146.2 (m, 2F).  $[\alpha]_D^{25} = -16.3^\circ$  (c = 0.3,  $\text{CHCl}_3$ ) quinine,  $[\alpha]_D^{25} = +93.9^\circ$  (c = 0.4,  $\text{CHCl}_3$ ) cinchonine. **HRMS (ESI+)**: Exact mass calculated for  $\text{C}_{22}\text{H}_{21}\text{BClF}_2\text{N}_2\text{O}_2$   $[\text{M}+\text{H}]^+$ : 429.1347, found: 429.1343. The enantiomeric excess was determined by **HPLC** using a Chiralpak OZH column, hexane/*i*PrOH = 95:5, flow rate 1.0 mL/min,  $\lambda = 210$  nm:  $t_r = 14.1, 15.8$ , 84% ee quinine and 89% ee cinchonine.

**methyl (3*S*,4*S*)-3-(3-chlorophenyl)-4-(5,5-difluoro-5*H*-4 $\lambda^4$ ,5 $\lambda^4$ -dipyrrolo[1,2-*c*:2',1'-*f*][1,3,2]diazaborinin-10-yl)-2-methylenepentanoate, 3i**

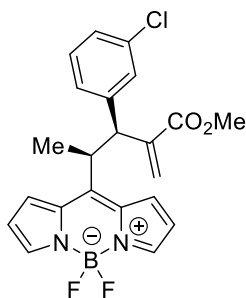

Following the general procedure the product was obtained after 6 days in 98% yield with quinine and 93% yield with cinchonine as a red foam.  $^1\text{H}$  NMR (400 MHz,  $\text{CDCl}_3$ )  $\delta$  7.75 (s, 2H), 7.70 - 7.55 (bs, 1H), 7.40 - 7.25 (bs, 1H), 7.06 - 7.03 (m, 1H), 7.00 - 6.92 (m, 2H), 6.86 - 6.82 (m, 1H), 6.64 - 6.55 (bs, 1H), 6.54 (s, 1H), 6.52 - 6.38 (bs, 1H), 5.95 (s, 1H), 4.59 (d,  $J = 12.0$  Hz, 1H), 3.99 (dq,  $J = 12.0, 7.0$  Hz, 1H), 3.77 (s, 3H), 1.59 (d,  $J = 7.0$  Hz, 3H).  $^{13}\text{C}$  NMR (101 MHz,  $\text{CDCl}_3$ )  $\delta$  167.2, 153.2, 145.0 (bs), 142.2 (bs), 141.8, 141.2, 136.1 (bs), 134.2, 133.1 (bs), 129.6, 128.8 (bs), 128.2, 127.4, 126.9, 126.5, 118.1 (bs), 52.7, 52.5, 41.2, 21.7.  $^{19}\text{F}$  NMR (376 MHz,  $\text{CDCl}_3$ )  $\delta$  -145.8 (dq,  $J = 58.1, 29.0$  Hz, 1F), -146.9 (dq,  $J = 58.1, 29.0$  Hz, 1F).  $[\alpha]_D^{25} = +511.5^\circ$  (c = 0.4,  $\text{CHCl}_3$ ) quinine,  $[\alpha]_D^{25} = -513.3^\circ$  (c = 0.3,  $\text{CHCl}_3$ ) cinchonine. **HRMS (ESI+)**: Exact mass calculated for  $\text{C}_{22}\text{H}_{21}\text{BClF}_2\text{N}_2\text{O}_2$   $[\text{M}+\text{H}]^+$ : 429.1347, found: 429.1353. The enantiomeric excess was determined by **HPLC** using a Chiralpak IE column, hexane/*i*PrOH = 90:10, flow rate 1.0 mL/min,  $\lambda = 210$  nm:  $t_r = 21.7, 23.3$ , 93% ee quinine and 87% ee cinchonine.

**methyl (3*S*,4*S*)-3-(3-bromophenyl)-4-(5,5-difluoro-5*H*-4 $\lambda^4$ ,5 $\lambda^4$ -dipyrrolo[1,2-*c*:2',1'-*f*][1,3,2]diazaborinin-10-yl)-2-methylenepentanoate, 3j**

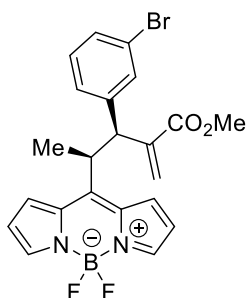

Following the general procedure the product was obtained after 8 days in 89% yield with quinine and 85% yield with cinchonine as a red foam.  $^1\text{H NMR}$  (400 MHz,  $\text{CDCl}_3$ )  $\delta$  7.75 (s, 2H), 7.70 - 7.53 (bs, 1H), 7.40 - 7.23 (bs, 1H), 7.22 - 7.19 (m, 1H), 7.16 - 7.10 (m, 1H), 6.92 - 6.85 (m, 2H), 6.63 - 6.53 (bs, 1H), 6.55 (s, 1H), 6.54 - 6.40 (bs, 1H), 5.95 (s, 1H), 4.58 (d,  $J = 12.0$  Hz, 1H), 3.96 (dq,  $J = 12.0, 7.0$  Hz, 1H), 3.79 (s, 3H), 1.59 (d,  $J = 7.0$  Hz, 3H).  $^{13}\text{C NMR}$  (101 MHz,  $\text{CDCl}_3$ )  $\delta$  167.1, 153.1, 145.1 (bs), 142.3 (bs), 142.0, 141.0, 133.2, 131.1, 130.3, 129.9, 128.9 (bs), 127.4, 126.5, 122.4, 118.1 (bs), 55.7, 52.5, 41.2, 21.7.  $^{19}\text{F NMR}$  (376 MHz,  $\text{CDCl}_3$ )  $\delta$  -145.9 (dq,  $J = 58.7, 28.6$  Hz, 1F), -147.0 (dq,  $J = 58.7, 28.6$  Hz, 1F).  $[\alpha]_{\text{D}}^{25} = +394.0^\circ$  ( $c = 0.4$ ,  $\text{CHCl}_3$ ) quinine,  $[\alpha]_{\text{D}}^{25} = -411.5^\circ$  ( $c = 0.4$ ,  $\text{CHCl}_3$ ) cinchonine. HRMS (ESI+): Exact mass calculated for  $\text{C}_{22}\text{H}_{21}\text{BBrF}_2\text{N}_2\text{O}_2$   $[\text{M}+\text{H}]^+$ : 473.0842, found: 473.0847. The enantiomeric excess was determined by HPLC using a Chiralpak IE column, hexane/*i*PrOH = 90:10, flow rate 1.0 mL/min,  $\lambda = 210$  nm:  $t_r = 23.2, 25.1$ , 89% ee quinine and 85% ee cinchonine.

**methyl (3*R*,4*S*)-4-(5,5-difluoro-5*H*-4 $\lambda^4$ ,5 $\lambda^4$ -dipyrrolo[1,2-*c*:2',1'-*f*][1,3,2]diazaborinin-10-yl)-3-(furan-2-yl)-2-methylenepentanoate, 3k**

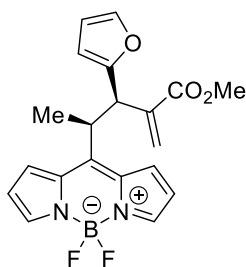

Following the general procedure the product was obtained after 3 days in >99% yield with quinine and 99% yield with cinchonine as a red foam.  $^1\text{H NMR}$  (400 MHz,  $\text{CDCl}_3$ )  $\delta$  7.79 (s, 2H), 7.75 - 7.64 (bs, 1H), 7.44 - 7.32 (bs, 1H), 7.12 (dd,  $J = 1.8, 0.6$  Hz, 1H), 6.65 - 6.50 (bs, 1H), 6.53 (s, 1H), 6.50 - 6.40 (bs, 1H), 6.09 (s, 1H), 6.04 (dd,  $J = 3.2, 1.9$  Hz, 1H), 5.82 (d,  $J = 3.2$  Hz, 1H), 4.83 (d,  $J = 11.6$  Hz, 1H), 3.94 (dq,  $J = 11.6, 7.2$  Hz, 1H), 3.84 (s, 3H), 1.51 (d,  $J = 7.2$  Hz, 3H).  $^{13}\text{C NMR}$  (101 MHz,  $\text{CDCl}_3$ )  $\delta$  167.6, 154.0, 152.9, 144.7 (bs), 142.1 (bs), 142.0, 139.8, 135.7, 133.0, 128.8 (bs), 128.0, 118.0 (bs), 110.4, 107.9, 52.6, 46.3, 42.2, 21.1.  $^{19}\text{F NMR}$  (376 MHz,  $\text{CDCl}_3$ )  $\delta$  -145.5 (dq,  $J = 59.7, 29.3$  Hz, 1F), -146.9 (dq,  $J = 59.7, 29.3$  Hz, 1F).  $[\alpha]_{\text{D}}^{25} = +33.3^\circ$  ( $c = 0.3$ ,  $\text{CHCl}_3$ ) quinine,  $[\alpha]_{\text{D}}^{25} = -7.5^\circ$  ( $c = 0.3$ ,  $\text{CHCl}_3$ ) cinchonine. HRMS (ESI+): Exact mass calculated for  $\text{C}_{22}\text{H}_{20}\text{BF}_2\text{N}_2\text{O}_3$   $[\text{M}+\text{H}]^+$ : 385.1530, found: 385.1536. The enantiomeric excess was determined by HPLC using a Chiralpak IE column, hexane/*i*PrOH = 90:10, flow rate 1.0 mL/min,  $\lambda = 210$  nm:  $t_r = 21.0, 22.3$ , 94% ee quinine and 86% ee cinchonine.

**methyl (3*S*,4*S*)-3-(4-chlorophenyl)-4-(5,5-difluoro-5*H*-4 $\lambda^4$ ,5 $\lambda^4$ -dipyrrolo[1,2-*c*:2',1'-*f*][1,3,2]diazaborinin-10-yl)-2-methyleneoctanoate, 3i**

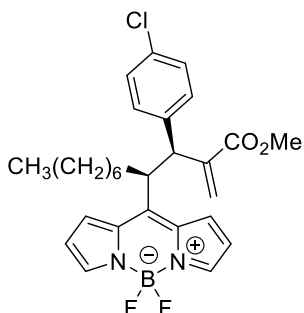

Following the general procedure the product was obtained after 10 days in >99% yield with quinine and 6 days in >99% yield with cinchonine as a red foam.  $^1\text{H NMR}$  (400 MHz,  $\text{CDCl}_3$ )  $\delta$  7.76 (bs, 1H), 7.73 (bs, 1H), 7.62 (d,  $J = 4.1$  Hz, 1H), 7.29 (d,  $J = 4.1$  Hz, 1H), 7.01 - 6.59 (m, 2H), 6.95 - 6.89 (m, 2H), 6.57 (dd,  $J = 4.1, 1.7$  Hz, 1H), 6.48 (s, 1H), 6.44 (dd,  $J = 4.1, 1.7$  Hz, 1H), 5.91 (s, 1H), 4.57 (d,  $J = 12.0$  Hz, 1H), 3.98 - 3.79 (m, 1H), 3.77 (s, 3H), 2.05 - 1.90 (m, 2H), 1.28 - 1.10 (m, 10H), 0.83 (t,  $J = 7.0$  Hz, 3H).  $^{13}\text{C NMR}$  (101 MHz,  $\text{CDCl}_3$ )  $\delta$  167.2, 152.5, 145.0 (bs), 142.3 (bs), 141.8, 138.2, 137.6 (bs), 133.1 (bs), 132.9, 129.7, 129.4 (bs), 128.7, 128.5 (bs), 128.1, 125.9, 124.4, 118.3 (bs), 117.9 (bs), 53.5, 52.5, 47.3, 35.9, 31.8, 29.6, 29.0, 28.6, 22.7, 14.1.  $^{19}\text{F NMR}$  (376 MHz,  $\text{CDCl}_3$ )  $\delta$  -145.8 (dq,  $J = 57.7, 28.7$  Hz, 1F), -147.0 (dq,  $J = 57.7, 28.7$  Hz, 1F).  $[\alpha]_{\text{D}}^{25} = +200.4^\circ$  ( $c = 0.3$ ,  $\text{CHCl}_3$ ) quinine,  $[\alpha]_{\text{D}}^{25} = -82.5^\circ$  ( $c = 0.1$ ,  $\text{CHCl}_3$ ) cinchonine. **HRMS (ESI+)**: Exact mass calculated for  $\text{C}_{28}\text{H}_{32}\text{BClF}_2\text{N}_2\text{O}_2$   $[\text{M}+\text{H}]^+$ : 512.2213, found: 512.2221. The enantiomeric excess was determined by **HPLC** using a Chiralpak ID column, hexane/*i*PrOH = 95:5, flow rate 1.0 mL/min,  $\lambda = 210$  nm:  $t_r = 20.2, 23.9$ , 92% ee quinine and 94% ee cinchonine.

**methyl (*S*)-4-(5,5-difluoro-1,3,7,9-tetramethyl-5*H*-4 $\lambda^4$ ,5 $\lambda^4$ -dipyrrolo[1,2-*c*:2',1'-*f*][1,3,2]diazaborinin-10-yl)-3-(4-fluorophenyl)-2-methylenebutanoate, 3m**

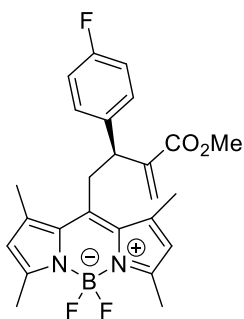

Following the general procedure the product was obtained after 8 days in 81% yield with cinchonine and 9 days in >99% yield with cinchonidine as a red foam.  $^1\text{H NMR}$  (400 MHz,  $\text{CDCl}_3$ )  $\delta$  7.04 - 6.97 (m, 2H), 6.88 - 6.80 (m, 2H), 6.48 (s, 1H), 6.08 (bs, 1H), 5.81 (bs, 1H), 5.78 (d,  $J = 0.9$  Hz, 1H), 4.19 (dd,  $J =$

9.5, 4.9 Hz, 1H), 3.48 - 3.37 (m, 2H), 3.60 (s, 3H), 2.54 (s, 3H), 2.47 (s, 3H), 2.35 (s, 3H), 1.92 (s, 3H). <sup>13</sup>C NMR (101 MHz, CDCl<sub>3</sub>) δ 166.5, 163.2, 160.7, 155.2, 153.1, 143.4, 142.8, 141.5 (bs), 139.4 (bs), 135.2, 132.9 (bs), 131.6 (bs), 129.4, 129.3, 125.0, 122.2 (bs), 121.6 (bs), 115.0, 114.8, 52.2, 48.4, 32.3, 16.7, 16.5, 14.6. <sup>19</sup>F NMR (376 MHz, CDCl<sub>3</sub>) δ -115.7 (s, 1F), -146.1 (dq, *J* = 63.9, 31.6 Hz, 1F), -147.6 (dq, *J* = 63.9, 31.6 Hz, 1F). [α]<sub>D</sub><sup>25</sup> = -475.3° (c = 0.3, CHCl<sub>3</sub>) cinchonine, [α]<sub>D</sub><sup>25</sup> = +870.2° (c = 0.3, CHCl<sub>3</sub>) cinchonidine. **HRMS (ESI+)**: Exact mass calculated for C<sub>25</sub>H<sub>27</sub>BF<sub>3</sub>N<sub>2</sub>O<sub>2</sub> [M+H]<sup>+</sup>: 455.2112, found: 455.2115. The enantiomeric excess was determined by **HPLC** using a Chiralpak IE column, hexane/iPrOH = 90:10, flow rate 1.0 mL/min, λ = 210 nm: t<sub>r</sub> = 11.0, 16.8, 88% ee cinchonine and 85% ee cinchonidine.

**methyl (S)-4-(5,5-difluoro-1,3,7,9-tetramethyl-5H-4λ<sup>4</sup>,5λ<sup>4</sup>-dipyrrolo[1,2-c:2',1'-f][1,3,2]diazaborinin-10-yl)-3-(4-chlorophenyl)-2-methylenebutanoate, 3n**

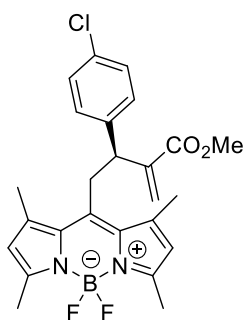

Following the general procedure the product was obtained after 3 days in 98% yield with cinchonine and 5 days in 98% yield with cinchonidine as a red foam. <sup>1</sup>H NMR (400 MHz, CDCl<sub>3</sub>) δ 7.13 (d, *J* = 8.5 Hz, 2H), 6.99 (d, *J* = 8.5 Hz, 2H), 6.47 (s, 1H), 6.07 (bs, 1H), 5.83 (bs, 1H), 5.77 (d, *J* = 0.9 Hz, 1H), 4.18 (dd, *J* = 9.2, 5.0 Hz, 1H), 3.59 (s, 3H), 3.46 (dd, *J* = 12.7, 5.0 Hz, 1H), 3.40 (dd, *J* = 12.7, 9.2 Hz, 1H), 2.54 (s, 3H), 2.47 (s, 3H), 2.35 (s, 3H), 1.93 (s, 3H). <sup>13</sup>C NMR (101 MHz, CDCl<sub>3</sub>) δ 166.6, 155.4 (bs), 153.4 (bs), 143.4, 142.7, 141.5 (bs), 139.5 (bs), 138.3, 133.1, 131.7, 129.3, 128.4, 125.4, 122.4 (bs), 121.8 (bs), 52.3, 48.7, 32.2, 16.8, 16.7, 14.7. <sup>19</sup>F NMR (376 MHz, CDCl<sub>3</sub>) δ -146.1 (dq, *J* = 63.8, 31.5 Hz, 1F), -147.5 (dq, *J* = 63.8, 31.5 Hz, 1F). [α]<sub>D</sub><sup>25</sup> = -784.2° (c = 0.3, CHCl<sub>3</sub>) cinchonine, [α]<sub>D</sub><sup>25</sup> = +834.6° (c = 0.25, CHCl<sub>3</sub>) cinchonidine. **HRMS (ESI+)**: Exact mass calculated for C<sub>25</sub>H<sub>27</sub>BClF<sub>2</sub>N<sub>2</sub>O<sub>2</sub> [M+H]<sup>+</sup>: 471.1817, found: 471.1823. The enantiomeric excess was determined by **HPLC** using a Chiralpak IE column, hexane/iPrOH = 90:10, flow rate 1.0 mL/min, λ = 210 nm: t<sub>r</sub> = 11.7, 18.7, 90% ee cinchonine and 92% ee cinchonidine.



**methyl (S)-4-(5,5-difluoro-1,3,7,9-tetramethyl-5H-4 $\lambda^4$ ,5 $\lambda^4$ -dipyrrolo[1,2-c:2',1'-f][1,3,2]diazaborinin-10-yl)-2-3-phenylbutanoate, 3o**

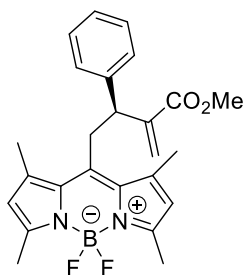

Following the general procedure the product was obtained after 6 days in 96% yield with cinchonine and 5 days in 99% yield with cinchonidine as a red foam.  $^1\text{H NMR}$  (400 MHz,  $\text{CDCl}_3$ )  $\delta$  7.20 - 7.12 (m, 3H), 7.08 - 7.05 (m, 2H), 6.44 (s, 1H), 6.07 (bs, 1H), 5.83 (bs, 1H), 5.73 (s, 1H), 4.24 (dd,  $J = 8.9, 5.4$  Hz, 1H), 3.58 (s, 3H), 3.53 - 3.37 (m, 2H), 2.54 (s, 3H), 2.46 (s, 3H), 2.37 (s, 3H), 1.91 (s, 3H).  $^{13}\text{C NMR}$  (101 MHz,  $\text{CDCl}_3$ )  $\delta$  166.8, 155.0 (bs), 153.2 (bs), 143.9, 143.1, 141.7 (bs), 139.8, 139.7 (bs), 133.1, 131.8, 128.3, 128.0, 127.3, 125.2, 122.1, 121.7, 52.2, 49.1, 32.4, 16.8, 16.7, 14.6 (bs).  $^{19}\text{F NMR}$  (376 MHz,  $\text{CDCl}_3$ )  $\delta$  -146.2 (dq,  $J = 67.0, 33.2$  Hz, 1F), -147.3 (dq,  $J = 67.0, 33.2$  Hz, 1F).  $[\alpha]_{\text{D}}^{25} = -572.9^\circ$  ( $c = 0.3$ ,  $\text{CHCl}_3$ ) cinchonine,  $[\alpha]_{\text{D}}^{25} = +637.9^\circ$  ( $c = 0.35$ ,  $\text{CHCl}_3$ ) cinchonidine. **HRMS (ESI+)**: Exact mass calculated for  $\text{C}_{25}\text{H}_{22}\text{BF}_2\text{N}_2\text{O}_2$   $[\text{M}+\text{H}]^+$ : 437.2206, found: 437.2209. The enantiomeric excess was determined by **HPLC** using a Chiralpak IE column, hexane/*i*PrOH = 90:10, flow rate 1.0 mL/min,  $\lambda = 210$  nm:  $t_r = 12.4, 19.8$ , 87% ee cinchonine and 90% ee cinchonidine.

**methyl (S)-4-(5,5-difluoro-1,3,7,9-tetramethyl-5H-4 $\lambda^4$ ,5 $\lambda^4$ -dipyrrolo[1,2-c:2',1'-f][1,3,2]diazaborinin-10-yl)-2-methylene-3-(4-nitrophenyl)butanoate, 3p**

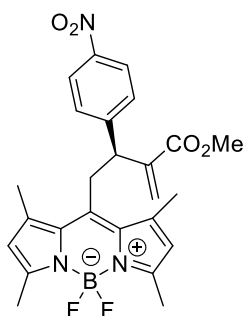

Following the general procedure the product was obtained after 12 days in 71% yield with cinchonine and 71% yield with cinchonidine as a red foam.  $^1\text{H NMR}$  (400 MHz,  $\text{CDCl}_3$ )  $\delta$  8.01 (d,  $J = 8.8$  Hz, 2H), 7.21 (d,  $J = 8.8$  Hz, 2H), 6.59 (s, 1H), 6.10 (bs, 1H), 5.90 (d,  $J = 1.1$  Hz, 1H), 5.76 (bs, 1H), 4.27 (dd,  $J = 10.1, 4.5$  Hz, 1H), 3.61 (s, 3H), 3.51 (dd,  $J = 12.7, 4.5$  Hz, 1H), 3.45 (dd,  $J = 12.7, 10.1$  Hz, 1H), 2.55 (s, 3H), 2.45 (s, 3H), 2.35 (s, 3H), 1.91 (s, 3H).  $^{13}\text{C NMR}$  (101 MHz,  $\text{CDCl}_3$ )  $\delta$  166.2, 155.8 (bs), 153.9 (bs), 147.2, 142.5, 141.8, 140.9 (bs), 139.5 (bs), 132.9 (bs), 131.7 (bs), 128.8, 127.5, 126.2, 123.4, 122.6 (bs),

122.0 (bs), 52.5, 49.3, 31.8, 16.9, 16.5, 14.7 (bs). **<sup>19</sup>F NMR (376 MHz, CDCl<sub>3</sub>)** δ -145.8 (dq, *J* = 67.8, 33.6 Hz, 1F), -147.8 (dq, *J* = 67.8, 33.6 Hz, 1F). **[α]<sub>D</sub><sup>25</sup>** = -471.8° (*c* = 0.2, CHCl<sub>3</sub>) cinchonine, **[α]<sub>D</sub><sup>25</sup>** = +829.7° (*c* = 0.2, CHCl<sub>3</sub>) cinchonidine. **HRMS (ESI+)**: Exact mass calculated for C<sub>25</sub>H<sub>27</sub>BF<sub>2</sub>N<sub>3</sub>O<sub>4</sub> [M+H]<sup>+</sup>: 482.2057, found: 482.2061. The enantiomeric excess was determined by **HPLC** using a Chiralpak IE column, hexane/*i*PrOH = 90:10, flow rate 1.0 mL/min, λ = 210 nm: *t<sub>r</sub>* = 31.3, 40.9, 71% ee cinchonine and 70% ee cinchonidine.

**methyl (S)-3-(3-bromophenyl)-4-(5,5-difluoro-1,3,7,9-tetramethyl-5H-4λ<sup>4</sup>,5λ<sup>4</sup>-dipyrrolo[1,2-*c*:2',1'-*f*][1,3,2]diazaborinin-10-yl)-2-methylenebutanoate, 3q**

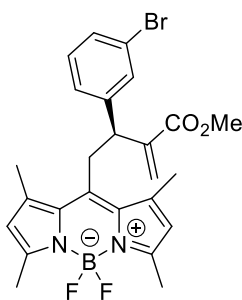

Following the general procedure the product was obtained after 10 days in >99% yield with cinchonine and 4 days in 98% yield with cinchonidine as a red foam. **<sup>1</sup>H NMR (400 MHz, CDCl<sub>3</sub>)** δ 7.28 (dd, *J* = 1.8, 1.3 Hz, 1H), 7.21 (t, *J* = 1.8 Hz, 1H), 7.02 (t, *J* = 7.7 Hz, 1H), 6.96 (dt, *J* = 7.7, 1.3 Hz, 1H), 6.50 (s, 1H), 6.07 (bs, 1H), 5.82 (bs, 1H), 5.79 (d, *J* = 1.0 Hz, 1H), 4.16 (dd, *J* = 9.5, 5.0 Hz, 1H), 3.61 (s, 3H), 3.46 (dd, *J* = 12.7, 5.0 Hz, 1H), 3.39 (dd, *J* = 12.7, 9.5 Hz, 1H), 2.54 (s, 3H), 2.47 (s, 3H), 2.34 (s, 3H), 1.94 (s, 3H). **<sup>13</sup>C NMR (101 MHz, CDCl<sub>3</sub>)** δ 166.5, 155.4 (bs), 153.4 (bs), 143.2, 142.3, 142.0, 141.5 (bs), 139.5 (bs), 133.1 (bs), 131.7 (bs), 130.5, 130.4, 129.8, 127.1, 125.8, 122.4 (bs), 122.3, 121.8 (bs), 52.4, 48.9, 32.2, 16.7, 14.7 (bs). **<sup>19</sup>F NMR (376 MHz, CDCl<sub>3</sub>)** δ -146.1 (dq, *J* = 64.3, 31.5 Hz, 1F), -147.4 (dq, *J* = 64.3, 31.5 Hz, 1F). **[α]<sub>D</sub><sup>25</sup>** = -587.0° (*c* = 0.3, CHCl<sub>3</sub>) cinchonine, **[α]<sub>D</sub><sup>25</sup>** = +603.7° (*c* = 0.3, CHCl<sub>3</sub>) cinchonidine. **HRMS (ESI+)**: Exact mass calculated for C<sub>25</sub>H<sub>27</sub>BBrF<sub>2</sub>N<sub>2</sub>O<sub>2</sub> [M+H]<sup>+</sup>: 515.1312, found: 515.1319. The enantiomeric excess was determined by **HPLC** using a Chiralpak IE column, hexane/*i*PrOH = 90:10, flow rate 1.0 mL/min, λ = 210 nm: *t<sub>r</sub>* = 12.5, 16.2, 84% ee cinchonine and 86% ee cinchonidine.

**methyl (S)-3-(4-chlorophenyl)-4-(5,5-difluoro-2,8-diiodo-1,3,7,9-tetramethyl-5H-4 $\lambda^4$ ,5 $\lambda^4$ -dipyrrolo[1,2-c:2',1'-f][1,3,2]diazaborinin-10-yl)-2-methylenebutanoate, 3r**

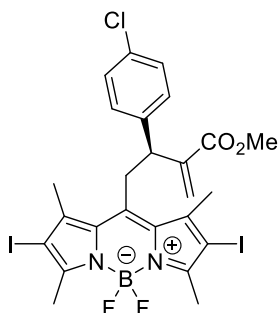

Following the general procedure the product was obtained after 8 days in 58% yield with cinchonine and 5 days in 99% yield with cinchonidine as a red foam.  $^1\text{H NMR}$  (400 MHz,  $\text{CDCl}_3$ )  $\delta$  7.13 (m, 2H), 6.95 (m, 2H), 6.48 (s, 1H), 5.77 (bs, 1H), 4.09 (dd,  $J = 11.3, 7.2$  Hz, 1H), 3.59 (s, 3H), 3.58-3.42 (m, 2H), 2.63 (s, 3H), 2.57 (s, 3H), 2.41 (bs, 3H), 2.01 (bs, 3H).  $^{13}\text{C NMR}$  (101 MHz,  $\text{CDCl}_3$ )  $\delta$  166.4, 156.6, 155.0, 143.4, 143.3 (bs), 142.1, 141.5 (bs), 137.8, 133.4, 133.1 (bs), 131.7 (bs), 129.1, 128.6, 128.4, 125.6, 52.4, 49.0, 33.1, 19.7, 19.3, 16.3 (bs).  $^{19}\text{F NMR}$  (376 MHz,  $\text{CDCl}_3$ )  $\delta$  -145.6 (m, 1F), -146.3 (m, 1F).  $[\alpha]_{\text{D}}^{25} = -168.5^\circ$  ( $c = 0.5$ ,  $\text{CHCl}_3$ ) cinchonine,  $[\alpha]_{\text{D}}^{25} = +235.3^\circ$  ( $c = 0.5$ ,  $\text{CHCl}_3$ ) cinchonidine. **HRMS (ESI+)**: Exact mass calculated for  $\text{C}_{25}\text{H}_{25}\text{BClF}_2\text{I}_2\text{N}_2\text{O}_2$   $[\text{M}+\text{H}]^+$ : 722.9750, found: 722.9756. The enantiomeric excess was determined by **HPLC** using a Chiralpak IE column, hexane/*i*PrOH = 95:5, flow rate 1.0 mL/min,  $\lambda = 210$  nm:  $t_r = 14.7, 19.1$ , 85% ee cinchonine and 87% ee cinchonidine.

**methyl (S)-3-(4-chlorophenyl)-4-(5,5-difluoro-1,3,7,9-tetramethyl-2,8-bis(trimethylsilyl)-5H-4 $\lambda^4$ ,5 $\lambda^4$ -dipyrrolo[1,2-c:2',1'-f][1,3,2]diazaborinin-10-yl)-2-methylenebutanoate, 3s**

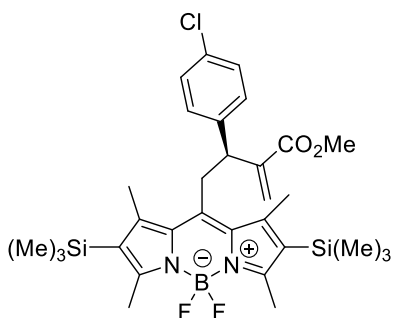

Following the general procedure the product was obtained after 3 days in 56% yield with cinchonine and 3 days in 68% yield with cinchonidine as a red foam.  $^1\text{H NMR}$  (400 MHz,  $\text{CDCl}_3$ )  $\delta$  7.16 (m, 2H), 6.97 (m, 2H), 6.45 (s, 1H), 5.73 (d,  $J = 0.9$  Hz, 1H), 4.13 (dd,  $J = 8.9, 6.2$  Hz, 1H), 3.58 (s, 3H), 3.57-3.45 (m, 2H), 2.62 (s, 3H), 2.56 (s, 3H), 2.45 (s, 3H), 2.08 (s, 3H), 0.26 (s, 9H), 0.23 (s, 9H).  $^{13}\text{C NMR}$  (101 MHz,  $\text{CDCl}_3$ )  $\delta$  166.5, 158.6, 157.2, 144.8, 142.7, 142.4, 141.3, 138.2, 133.4, 132.6, 129.1, 128.6, 125.7, 52.3, 48.9, 32.6, 15.6, 15.5, 13.7 (bs), 0.28, 0.22.  $^{19}\text{F NMR}$  (376 MHz,  $\text{CDCl}_3$ )  $\delta$  -146.3 (dq,  $J = 65.3, 32.2$  Hz,

1F), -147.7 (dq,  $J = 65.3, 32.2$  Hz, 1F). **HRMS (ESI+)**: Exact mass calculated for  $C_{31}H_{43}BClF_2N_2O_2Si_2$   $[M+H]^+$ : 615.2607, found: 615.2613.

# NMR spectra

## 3a

oc1519mm10  
mm-8943-4 full

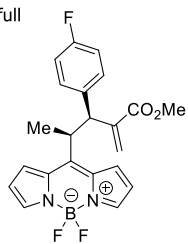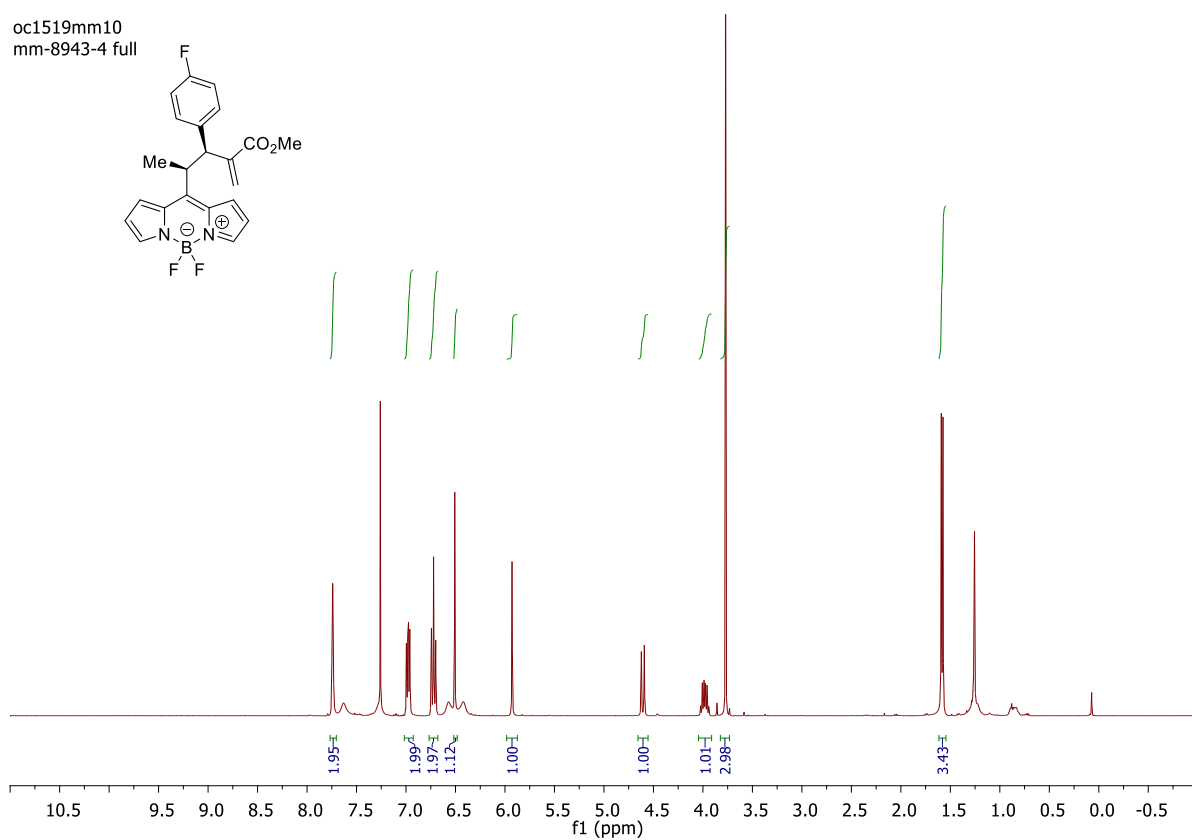

oc1519mm10  
mm-8943-4 full

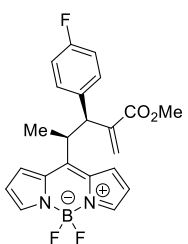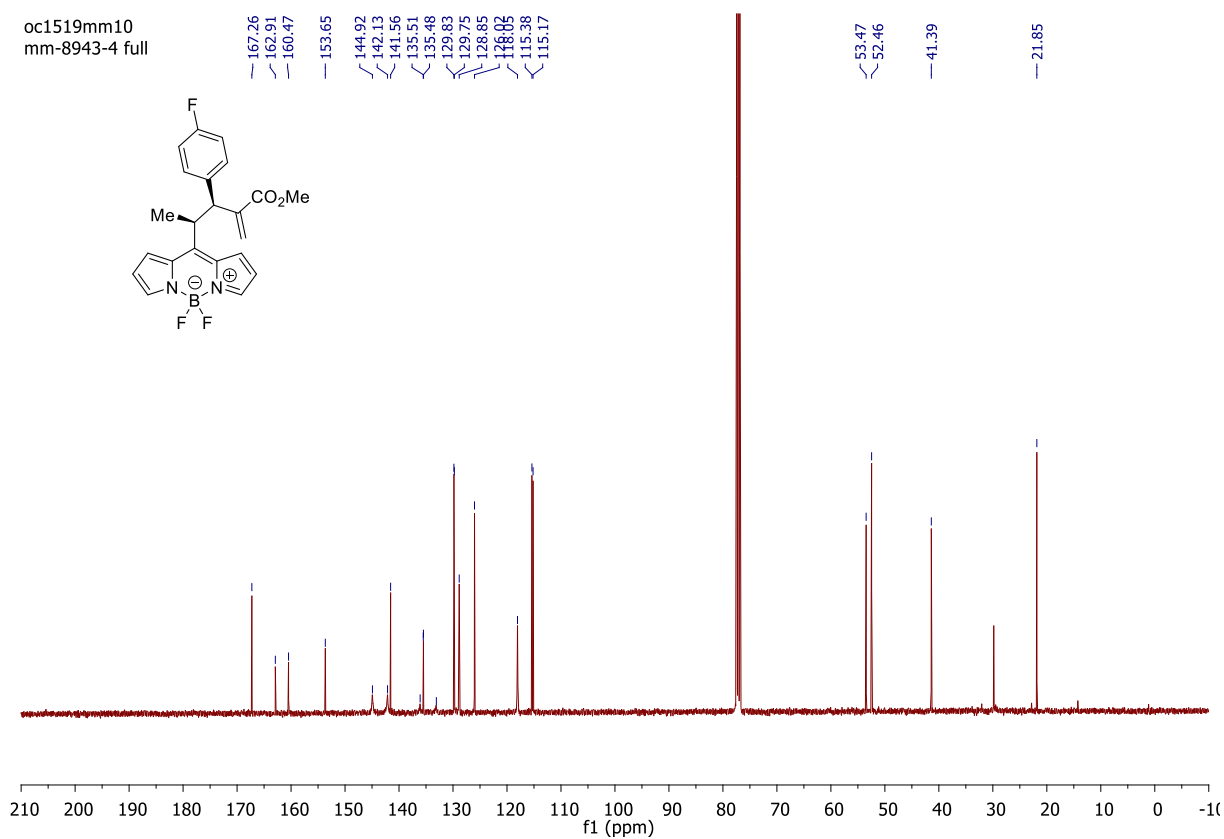

oc1519mm10  
mm-8943-4 full

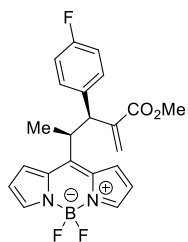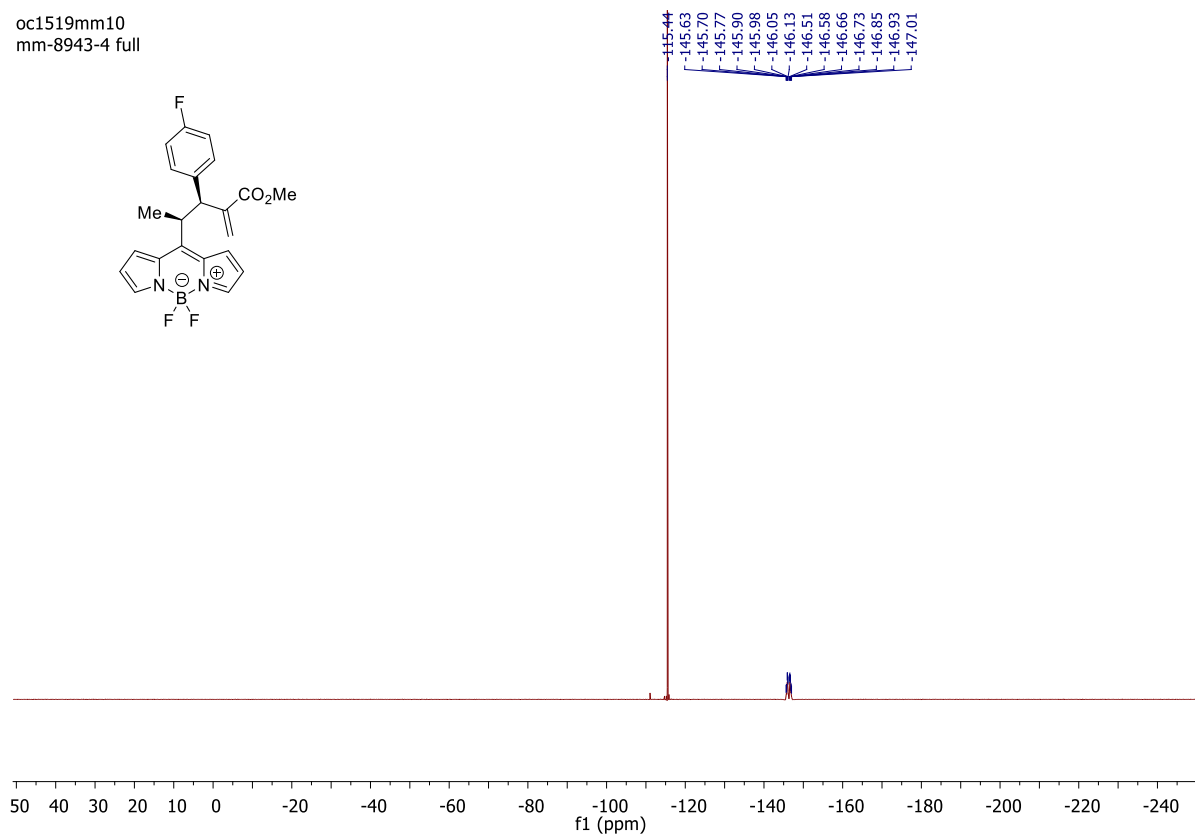

### 3b

nv0119mm18  
mm-8943-38 full

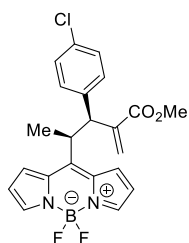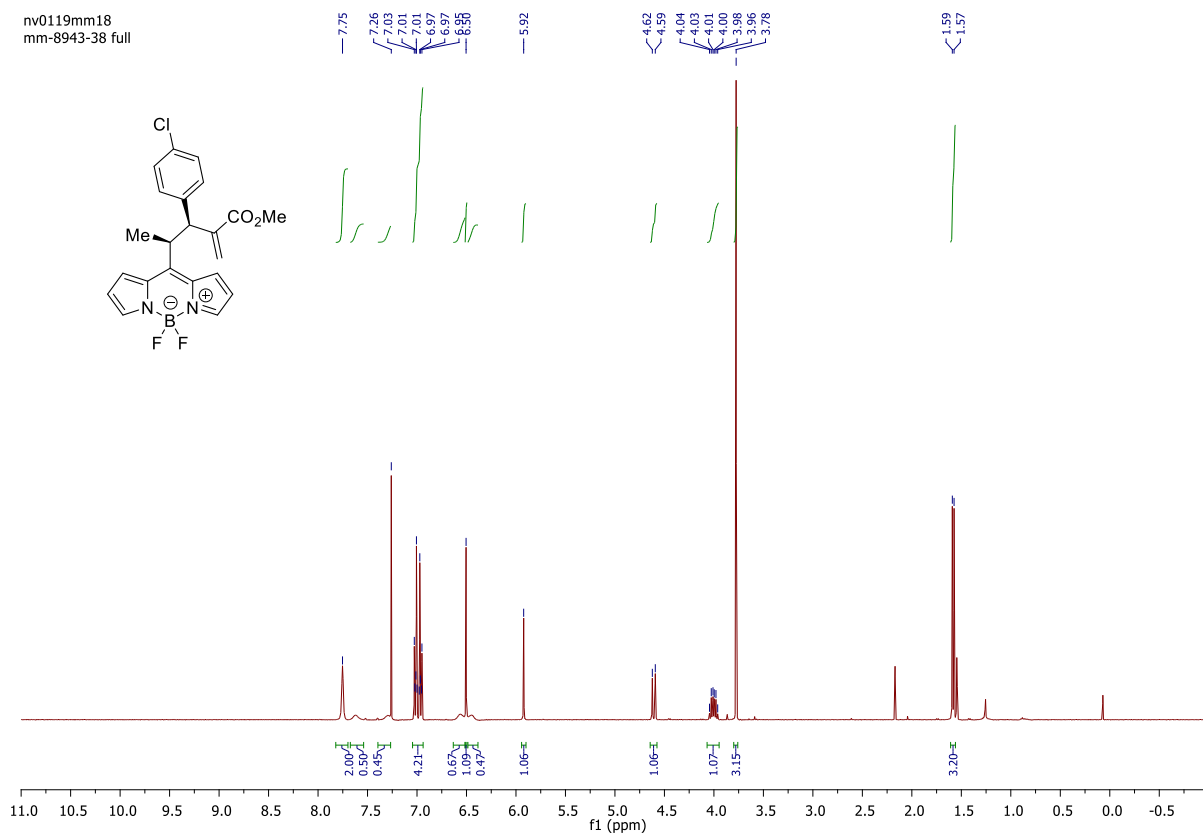

nv0119mm18  
mm-8943-38 full

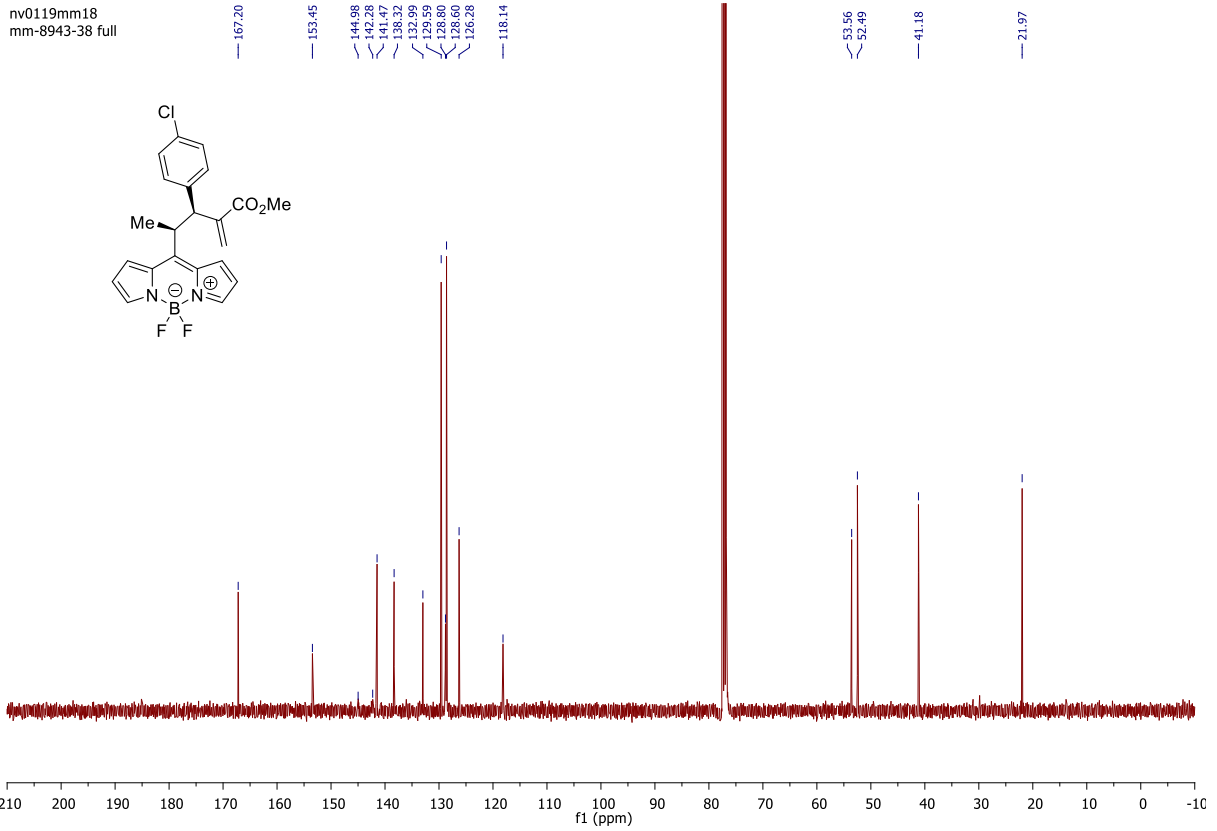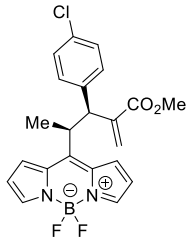

nv0119mm18  
mm-8943-38 full

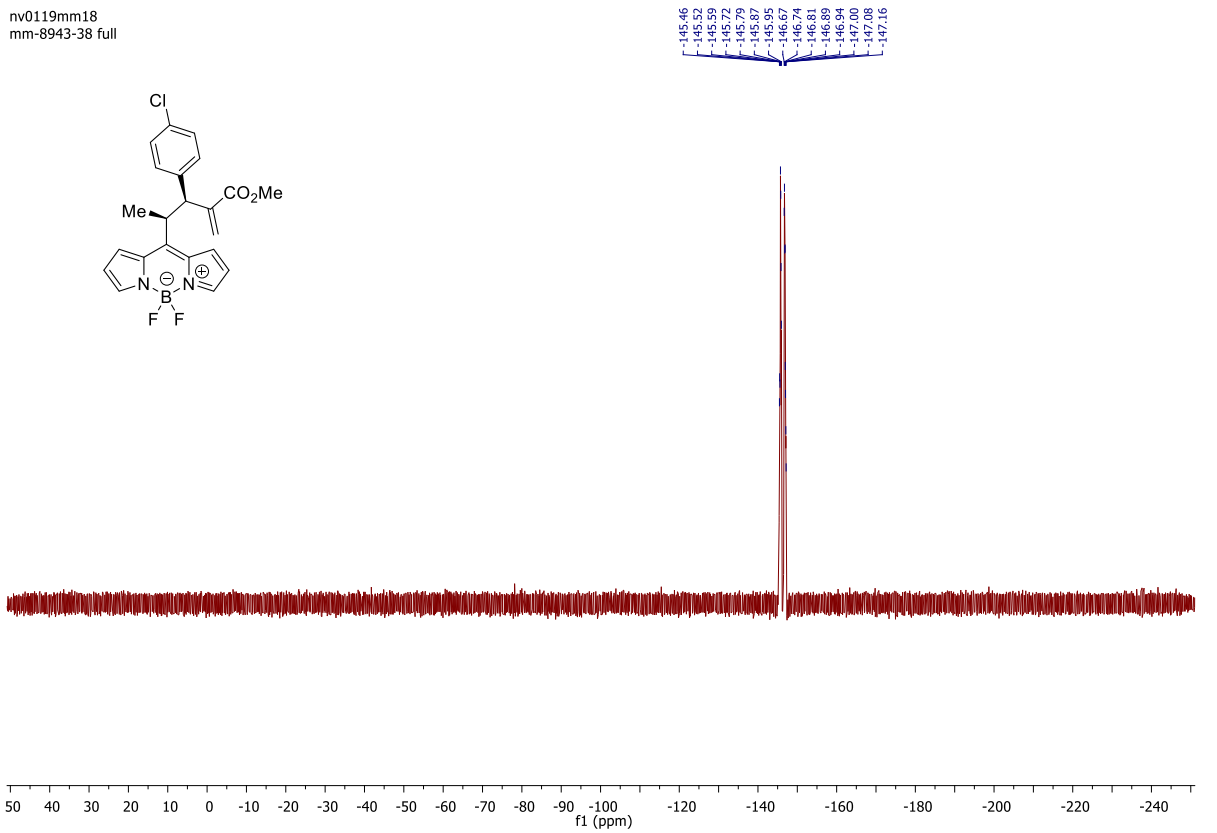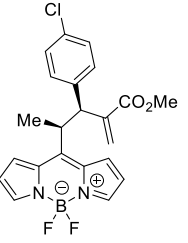

3c

nv0119mm17  
mm-8943-37 full

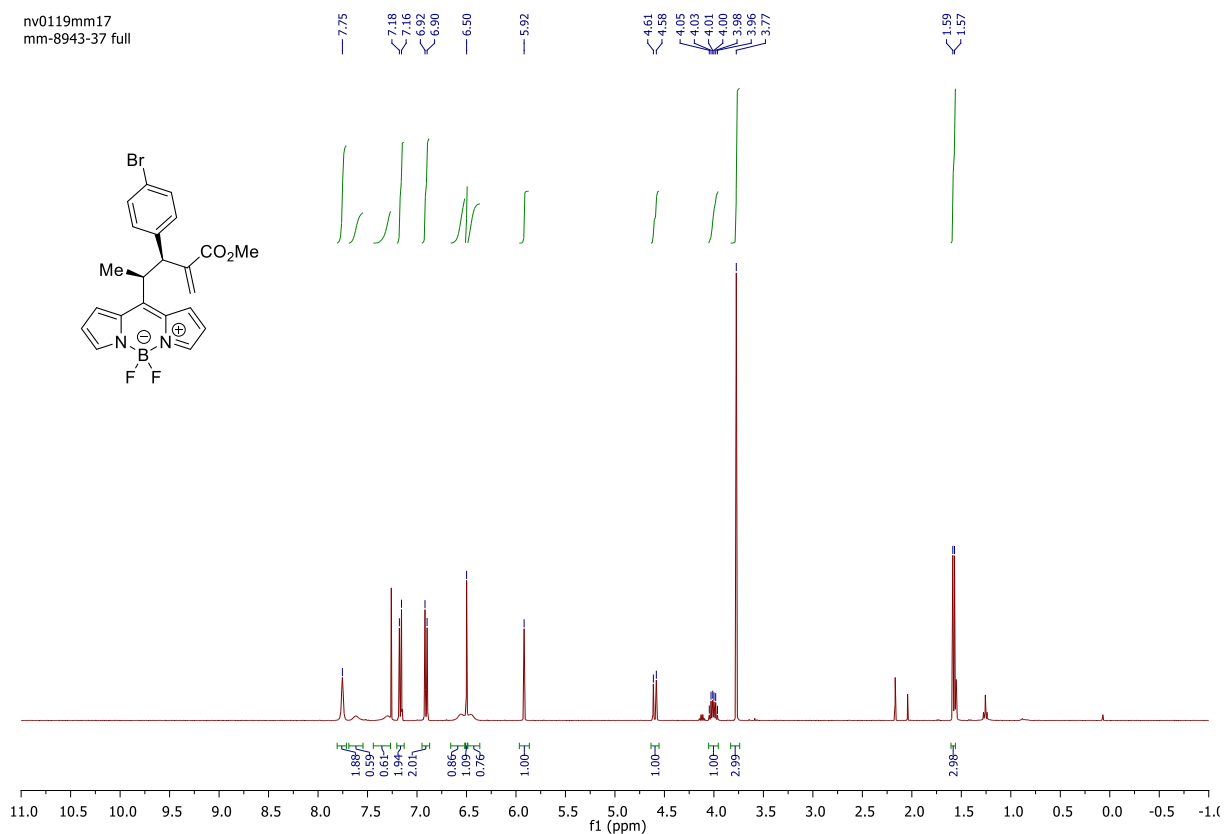

nv0119mm17  
mm-8943-37 full

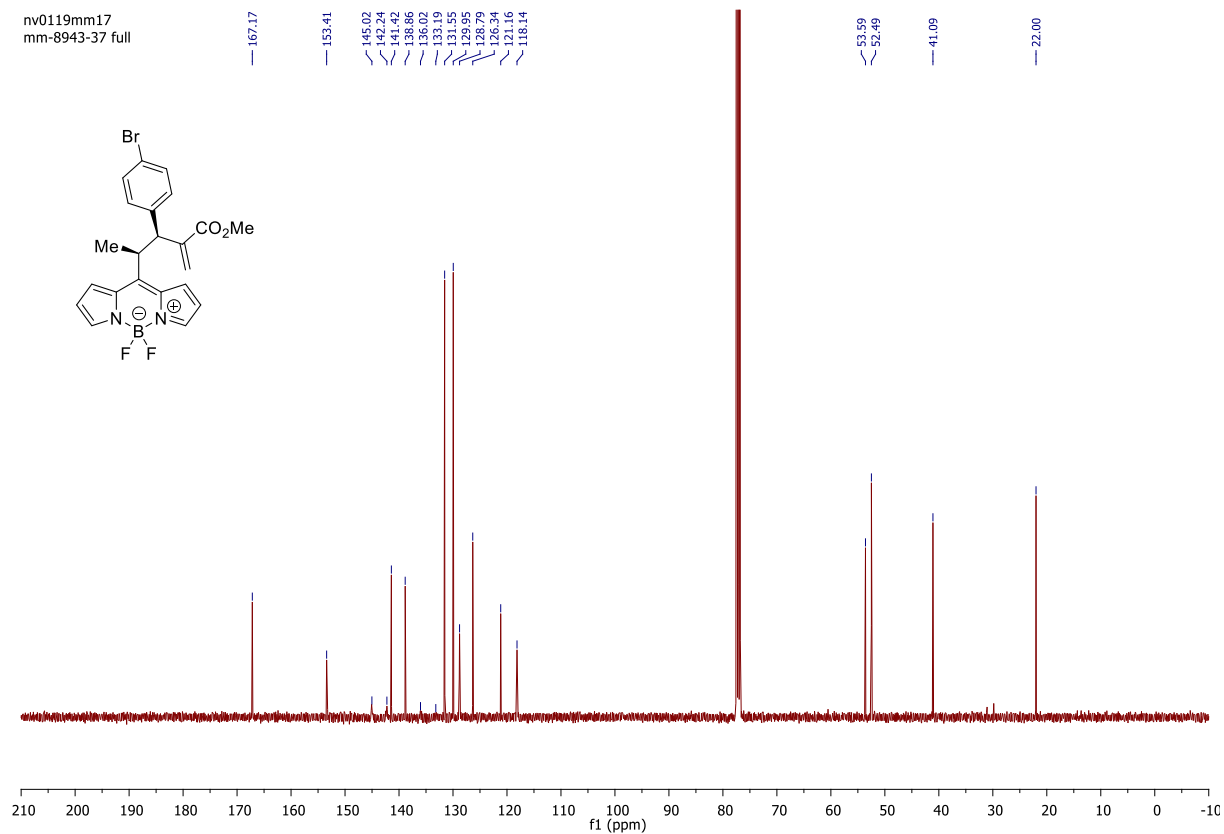



nv0119mm17  
mm-8943-37 full

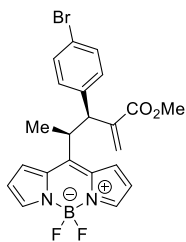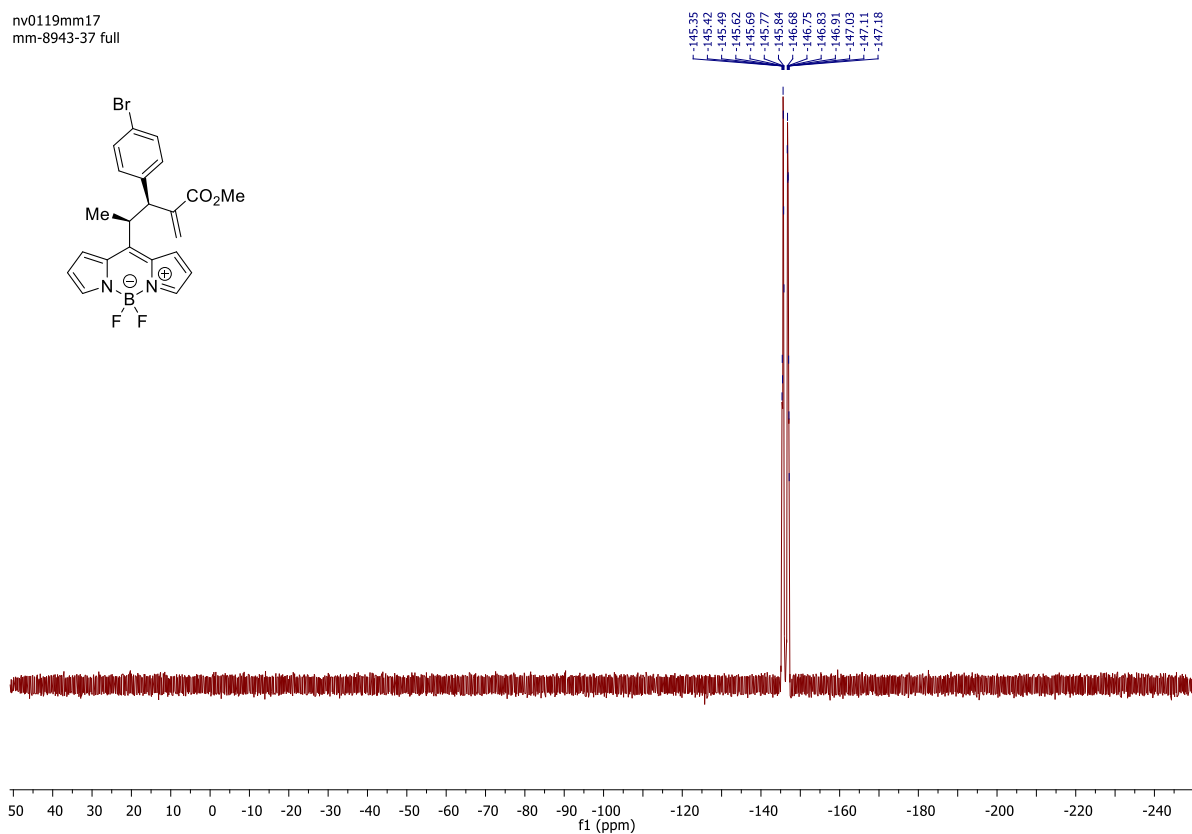

### 3d

nv0119mm19  
mm-8943-36 full

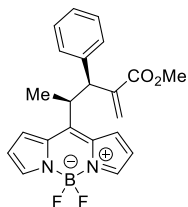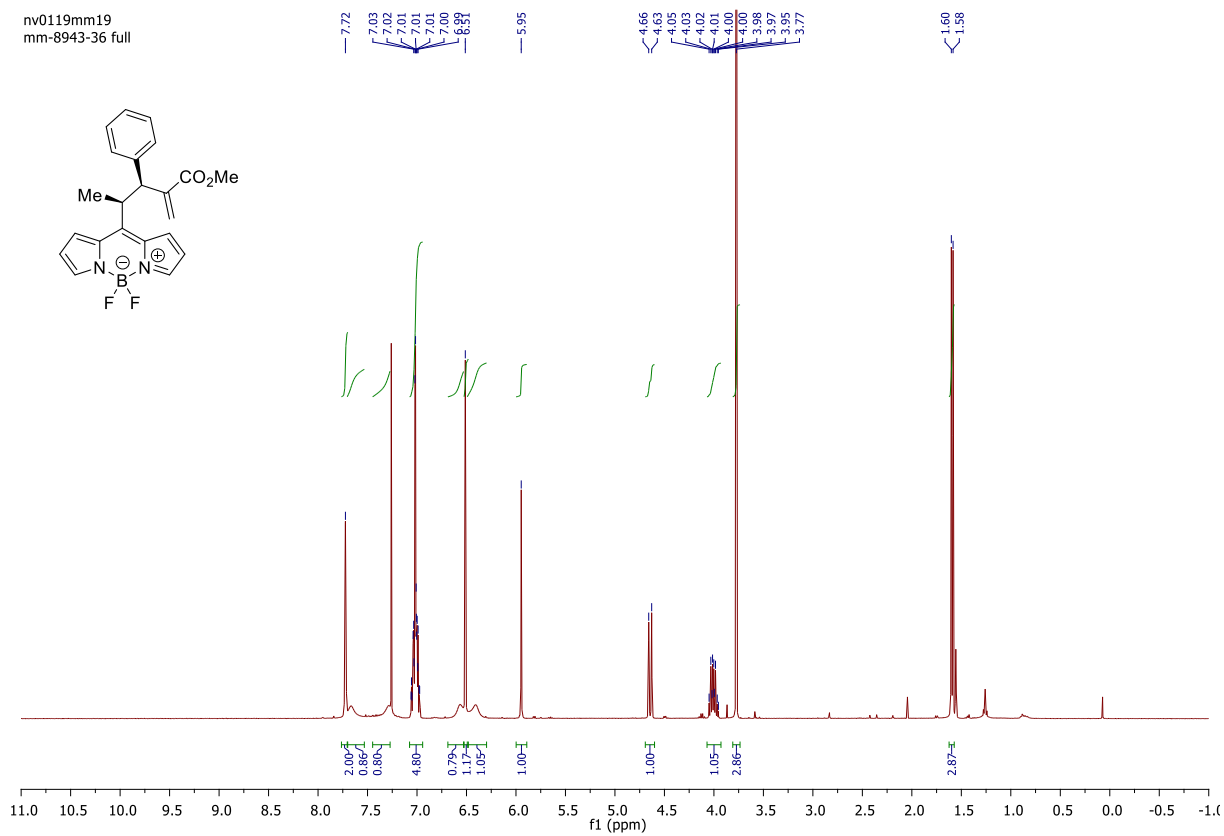

nv0119mm19  
mm-8943-36 full

- 167.45
- 153.99
- 144.62
- 142.01
- 141.73
- 139.70
- 136.14
- 135.86
- 128.94
- 128.38
- 128.26
- 127.16
- 125.98
- 117.92

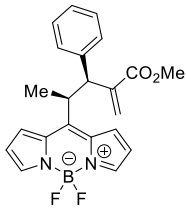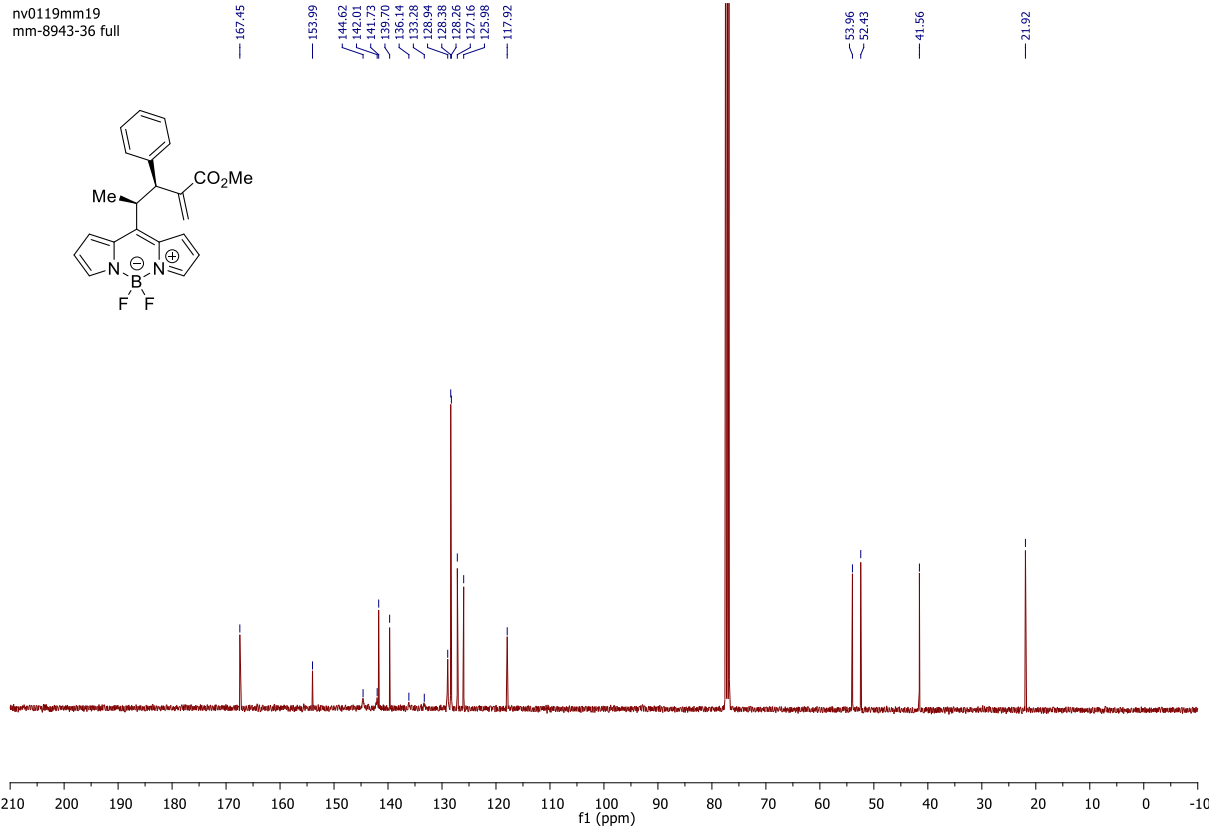

nv0119mm19  
mm-8943-36 full

- 145.53
- 145.52
- 145.58
- 145.81
- 145.88
- 145.95
- 146.03
- 146.73
- 146.80
- 146.87
- 147.07
- 147.14

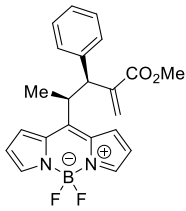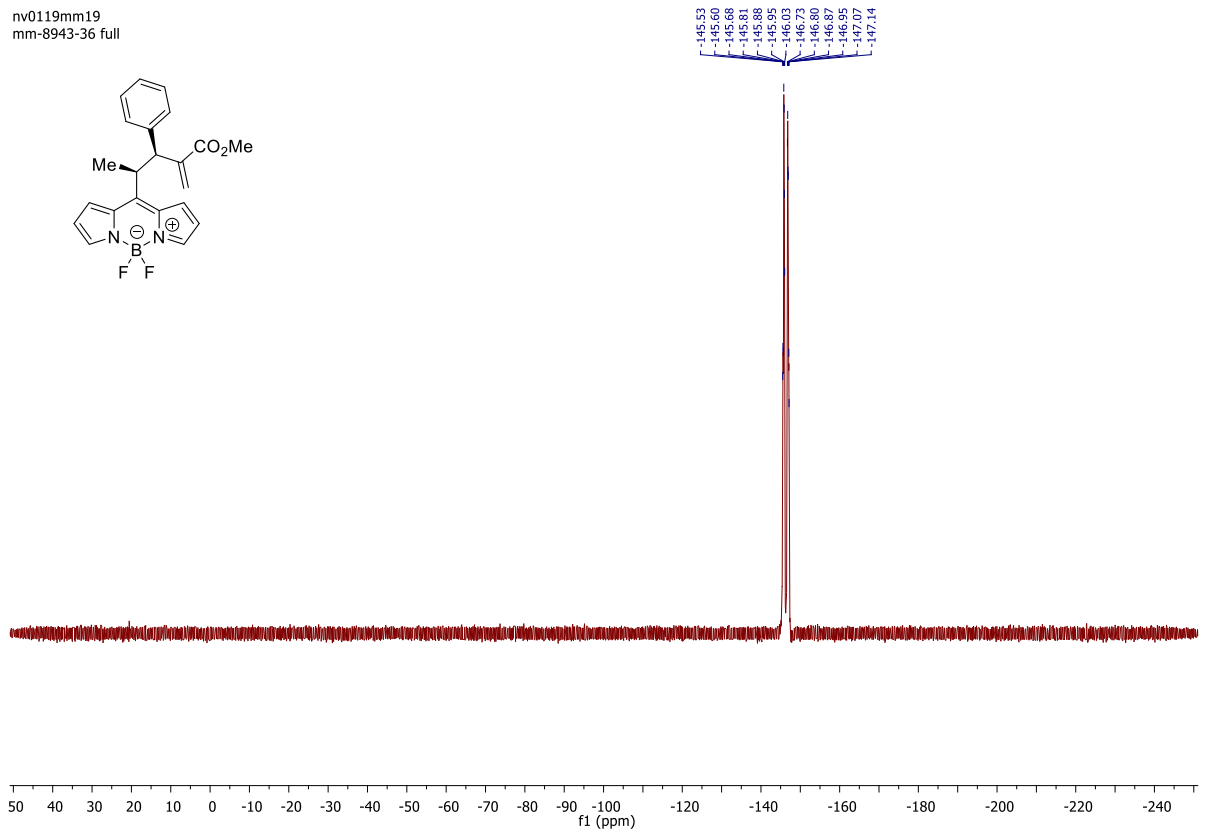

3e

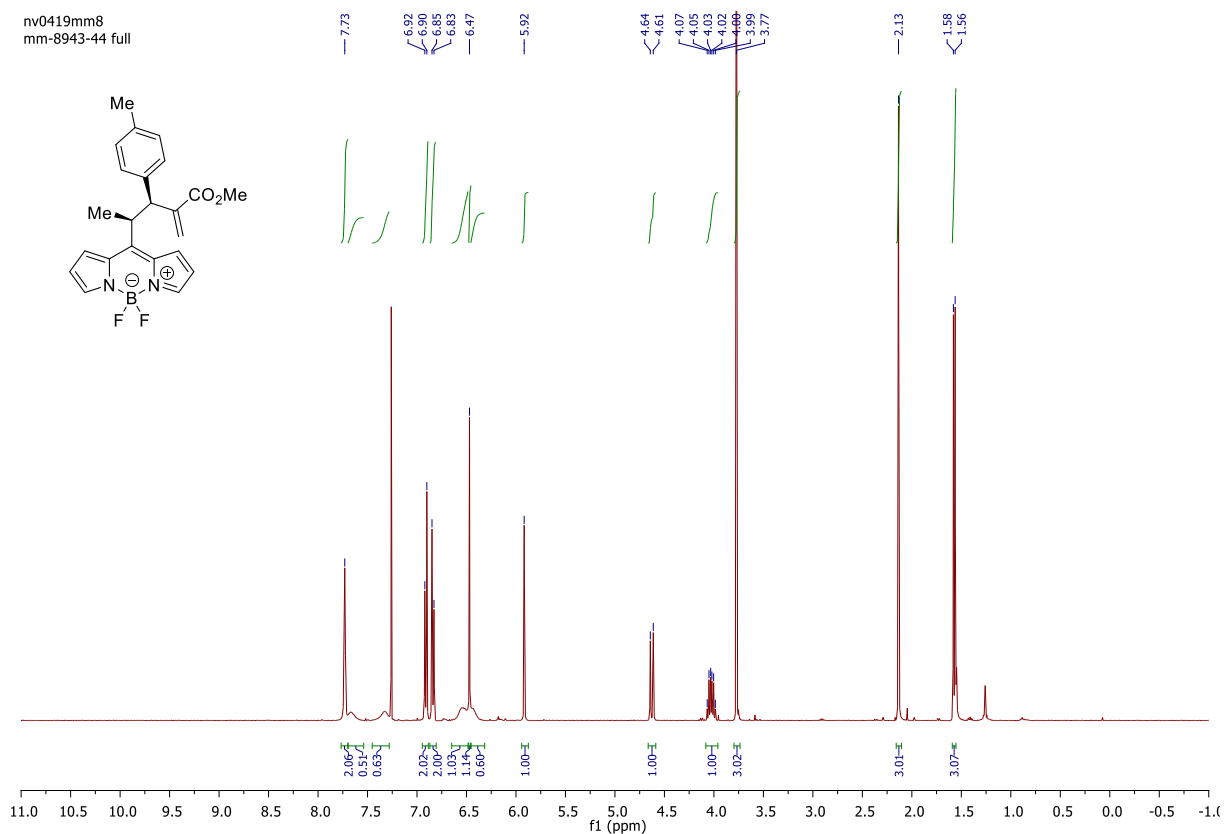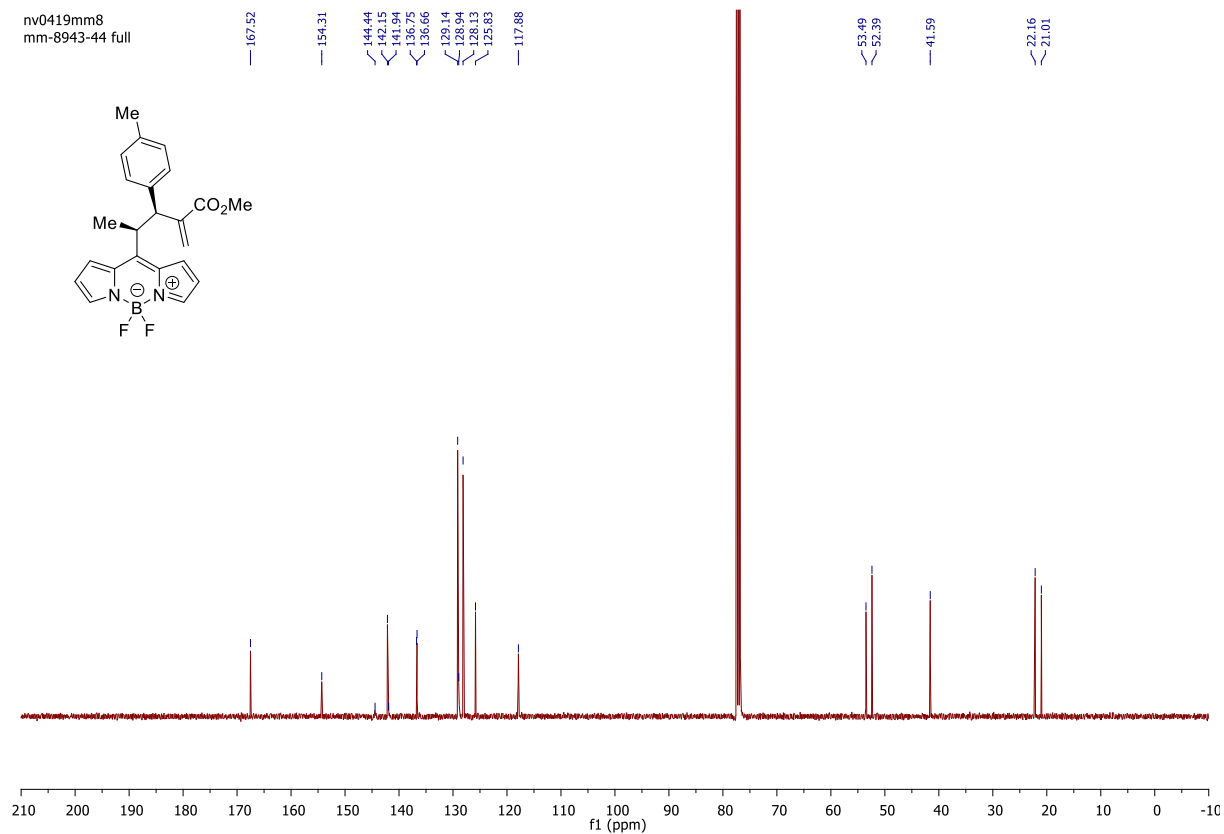

nv0419mm8  
mm-8943-44 full

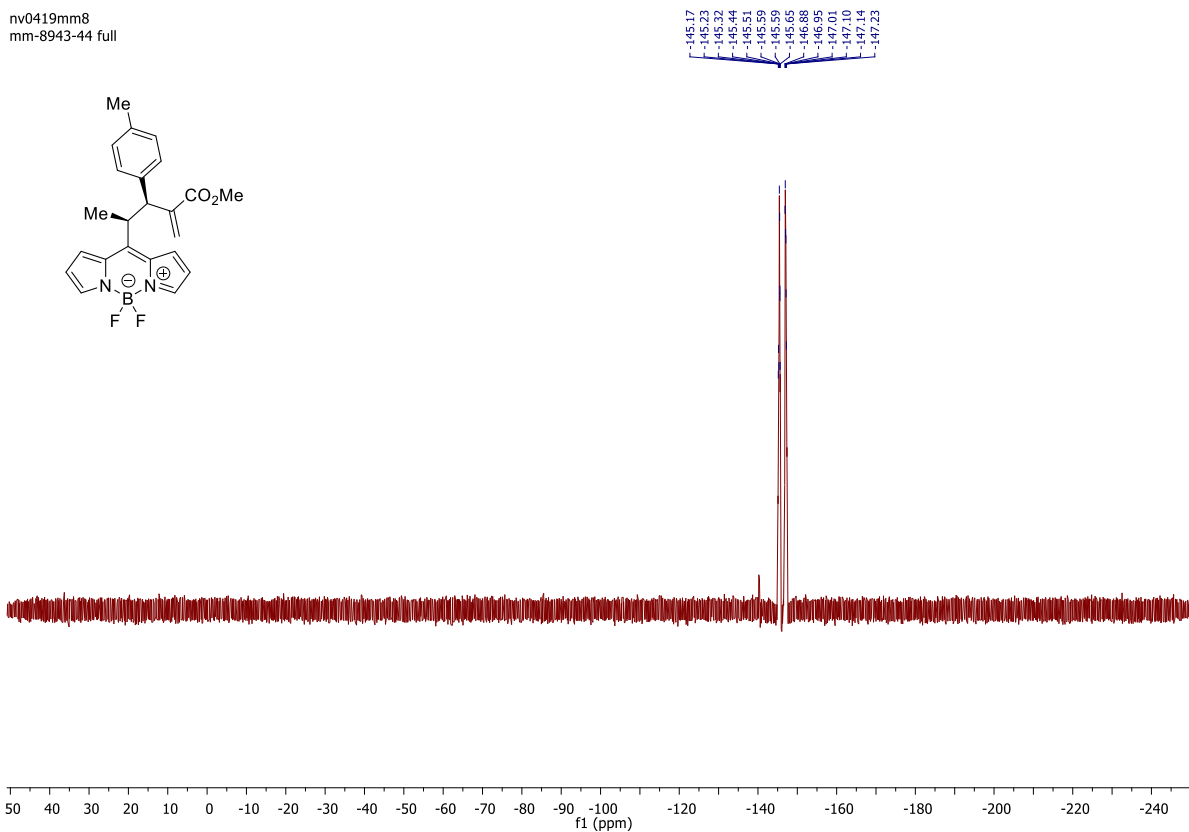

### 3f

dc1219mm5  
mm-8943-79 full

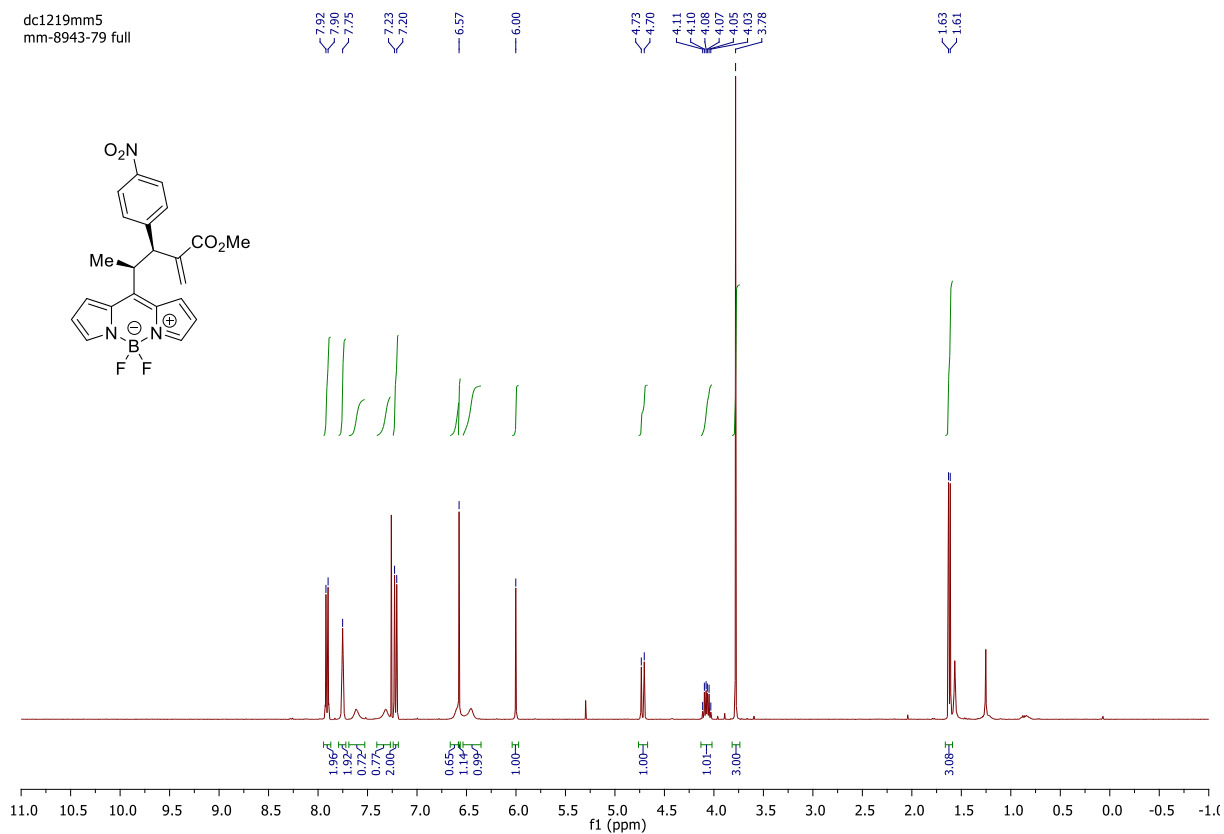

dc1219mm5  
mm-8943-79 full

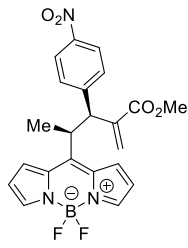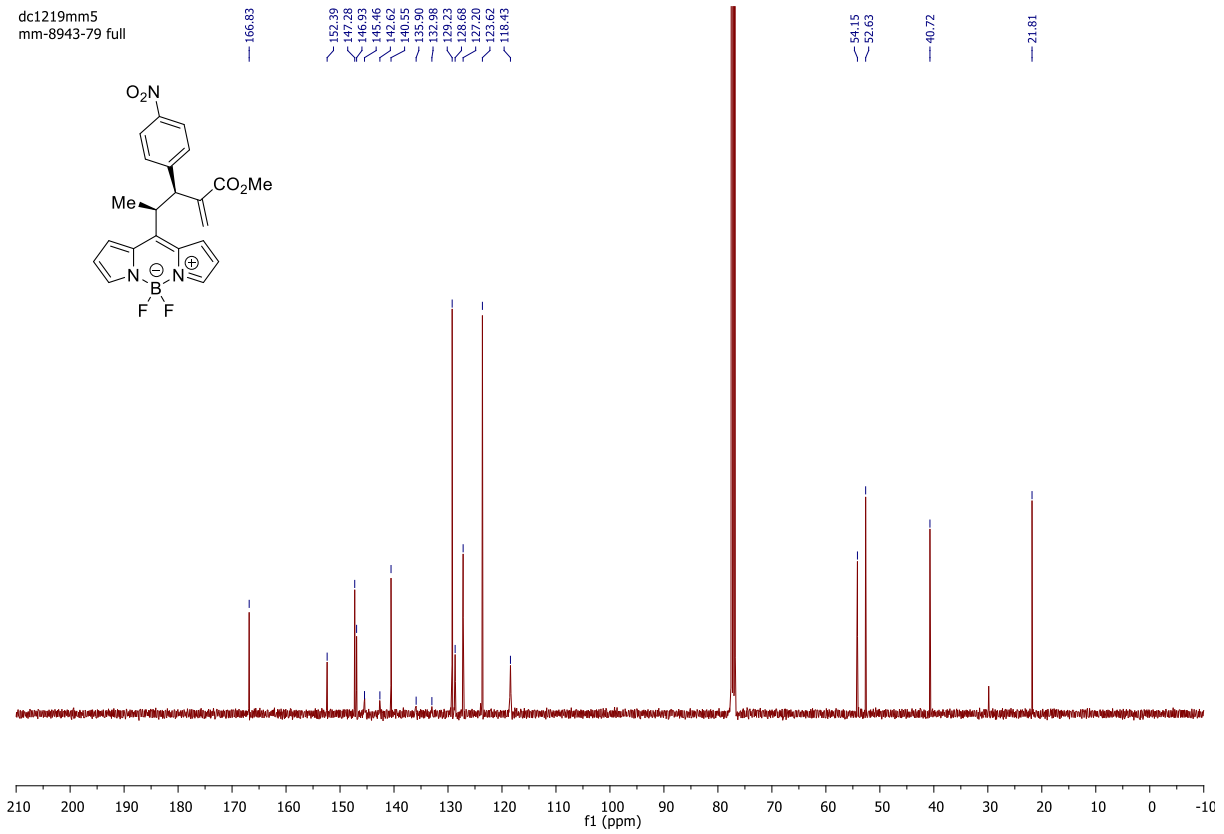

dc1219mm5  
mm-8943-79 full

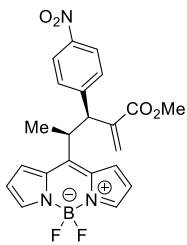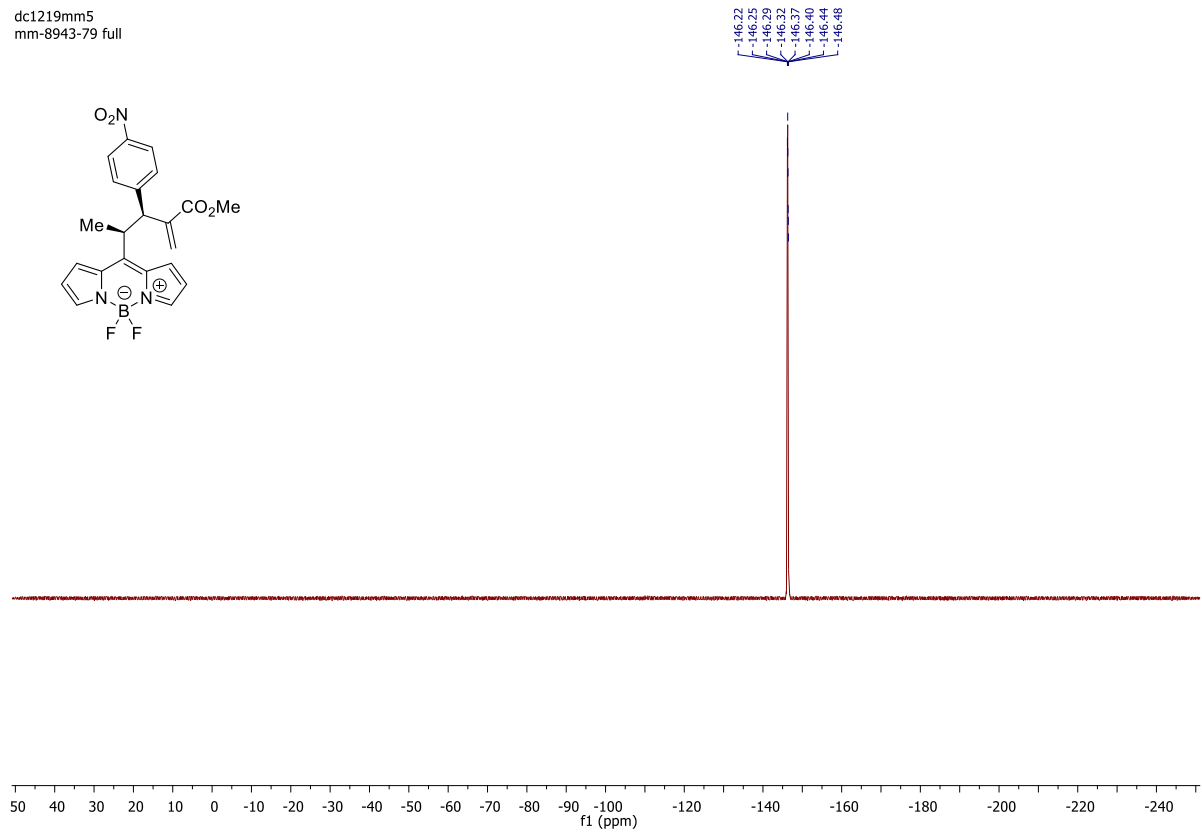

3g

dc0419mm2  
mm-8943-73 fc full

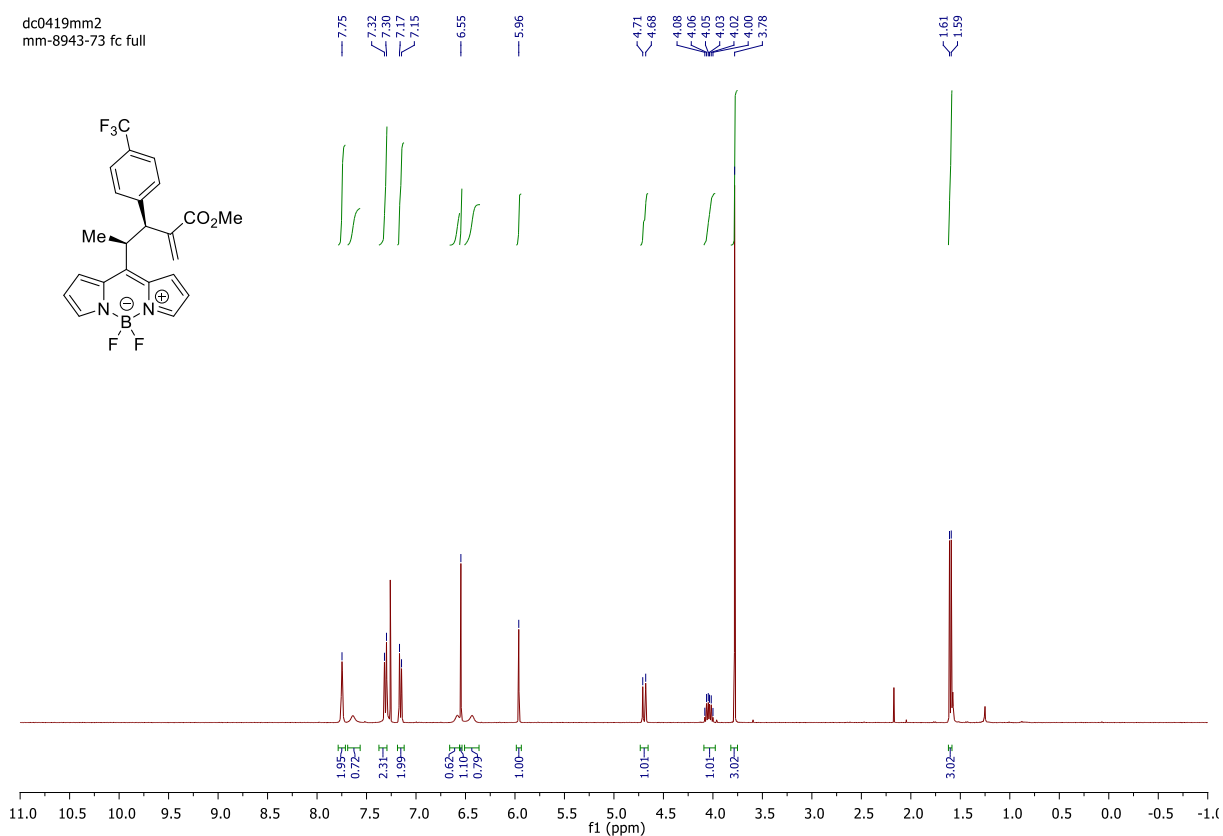

dc0419mm2  
mm-8943-73 fc full

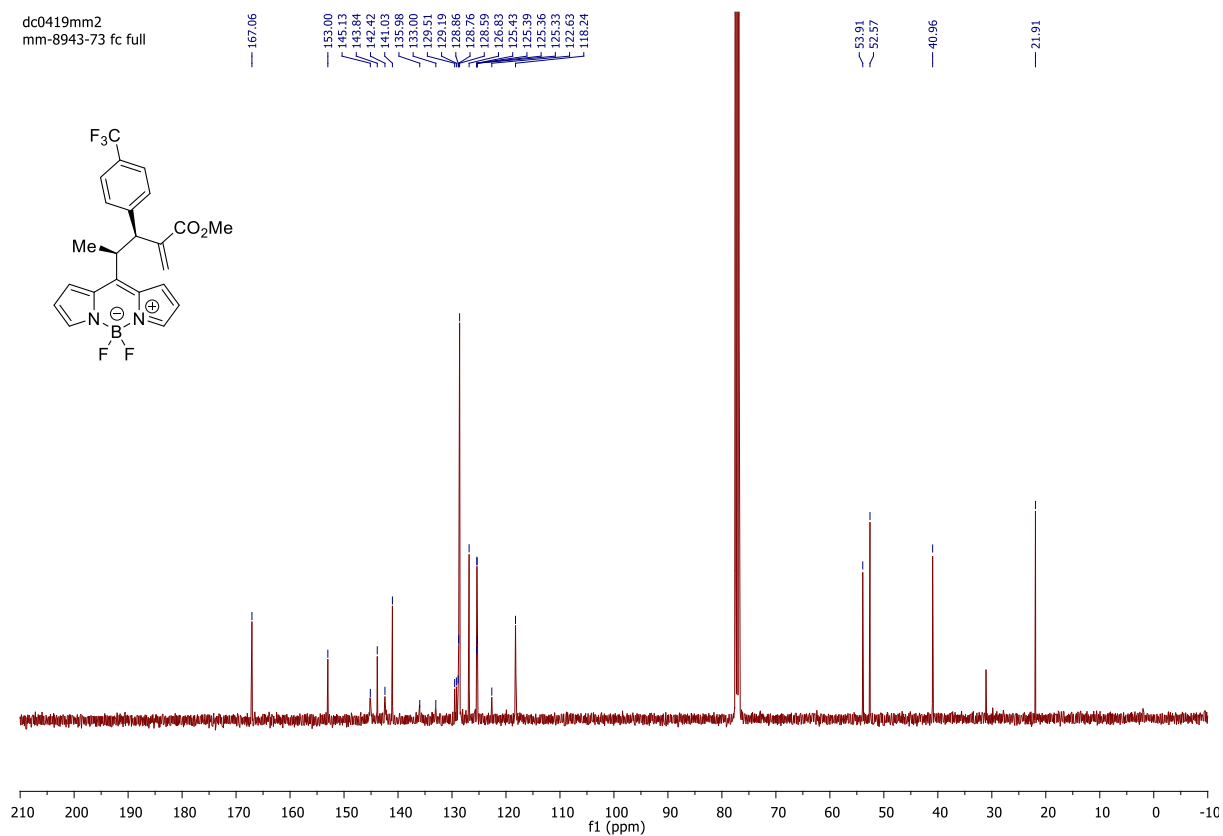

dc0419mm2  
mm-8943-73 fc full

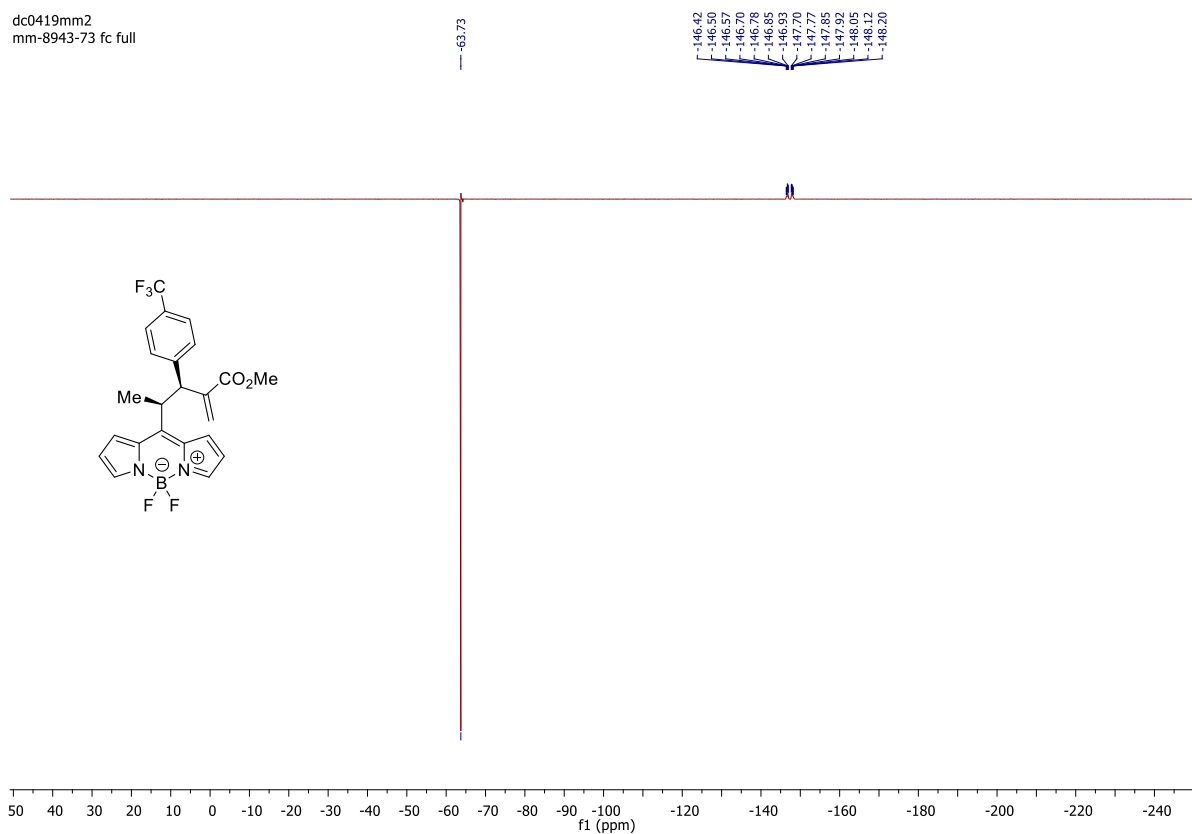

### 3h

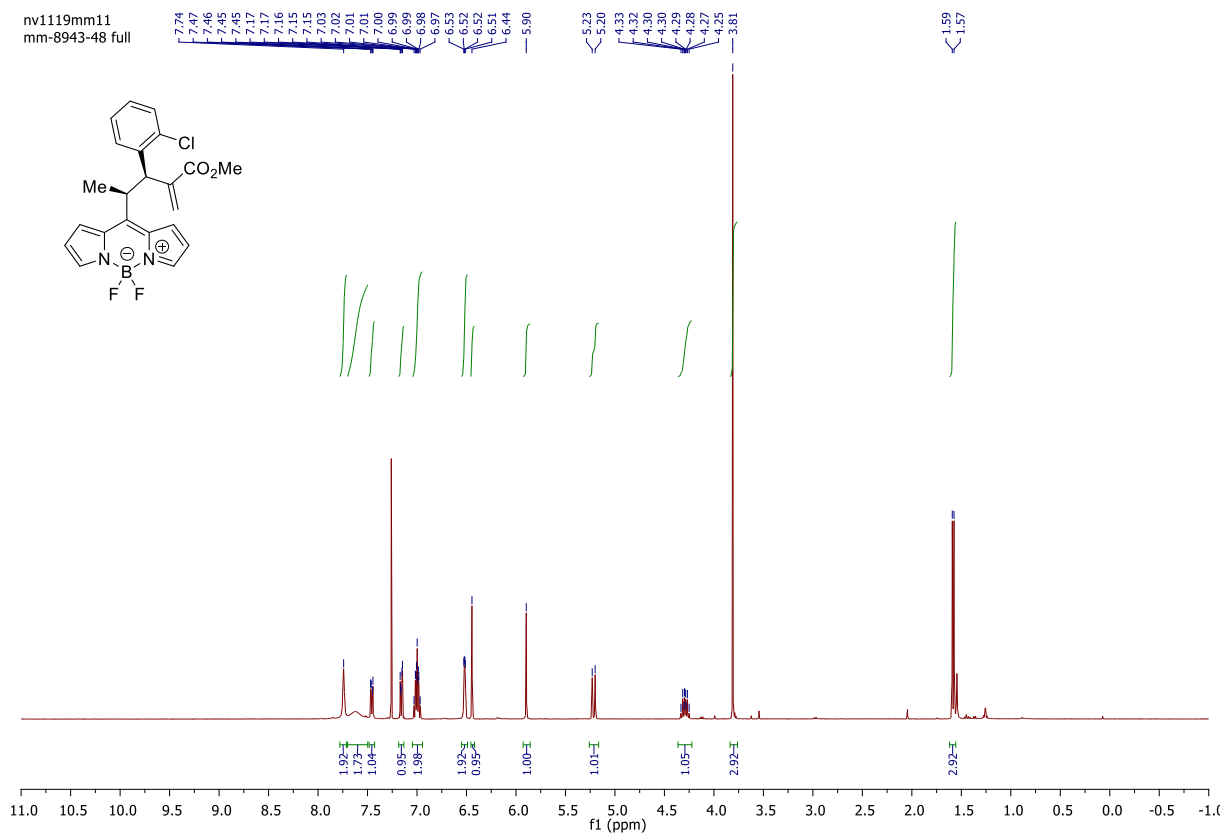

nv1119mm11  
mm-8943-48 full

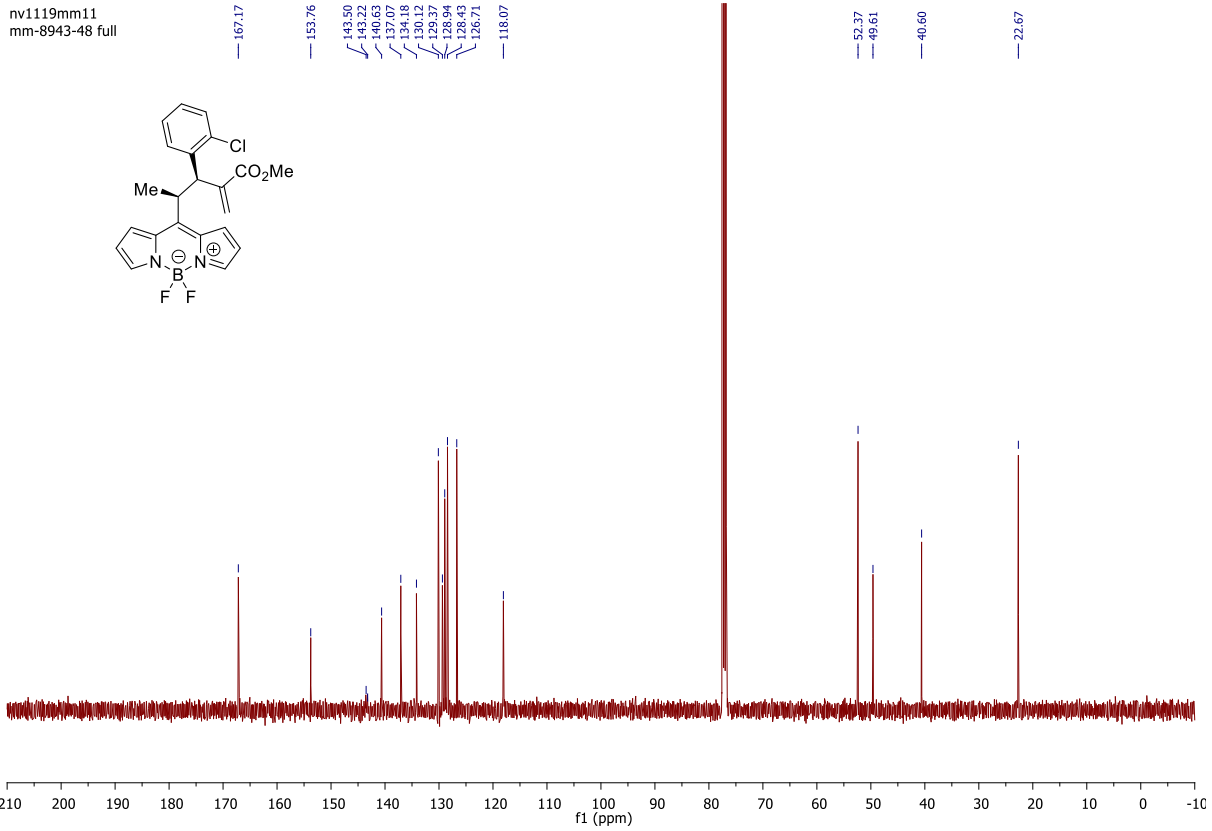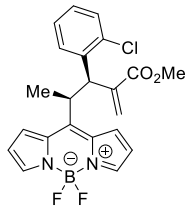

nv1119mm11  
mm-8943-48 full

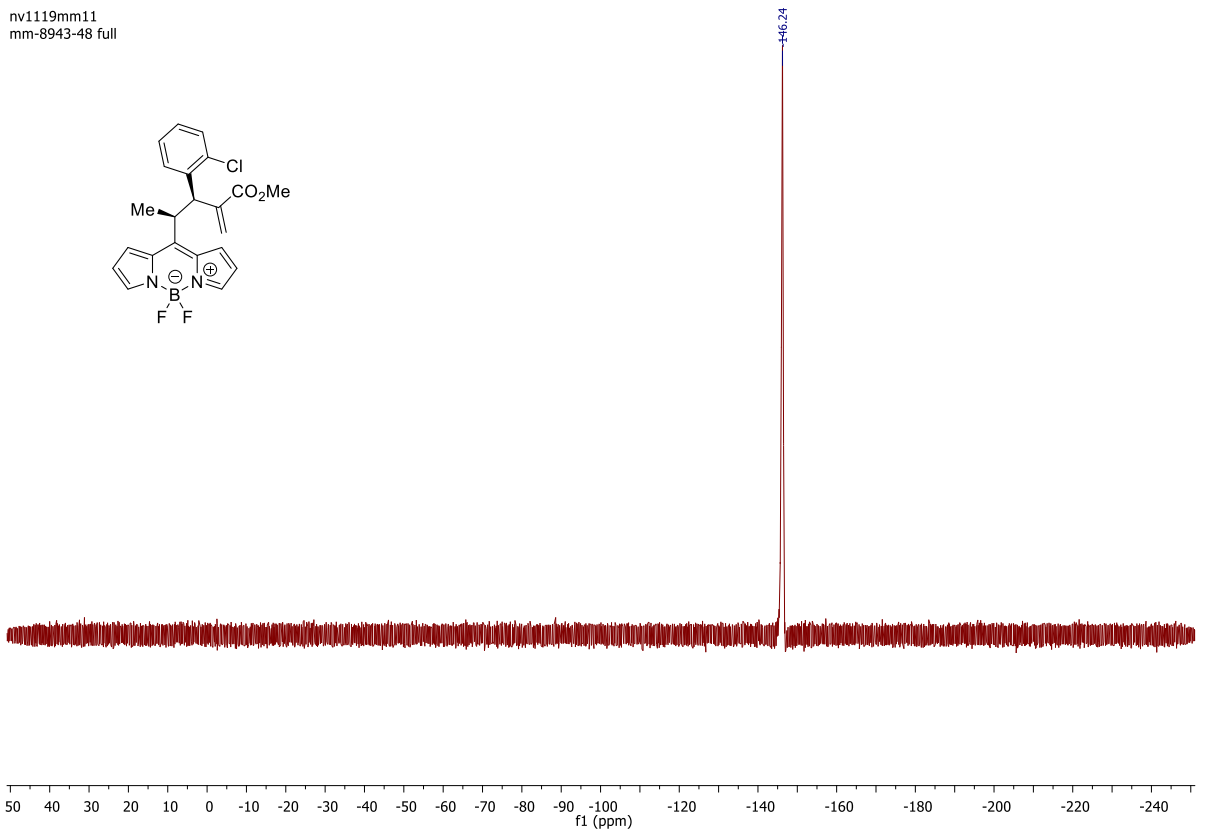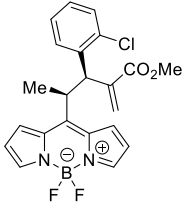



3i

nv0619mm3  
mm-8943-49 full

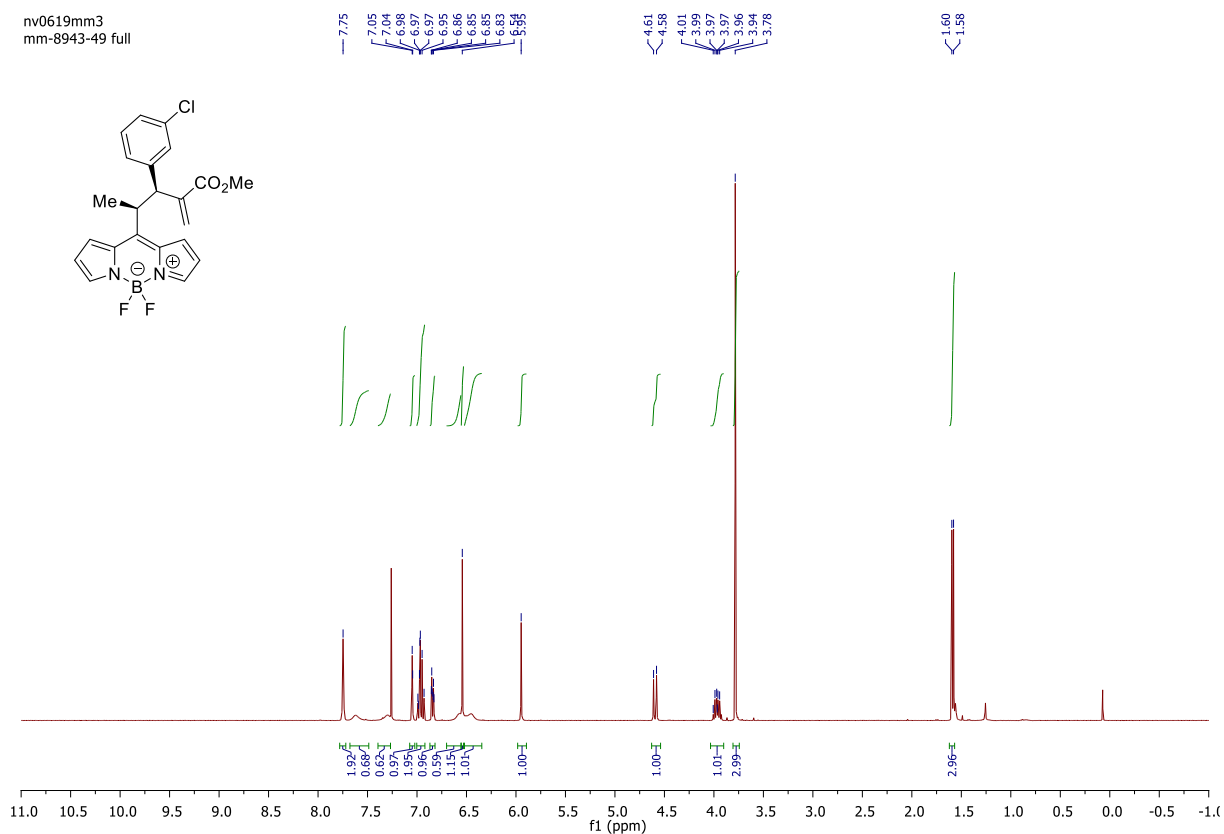

nv0619mm3  
mm-8943-49 full

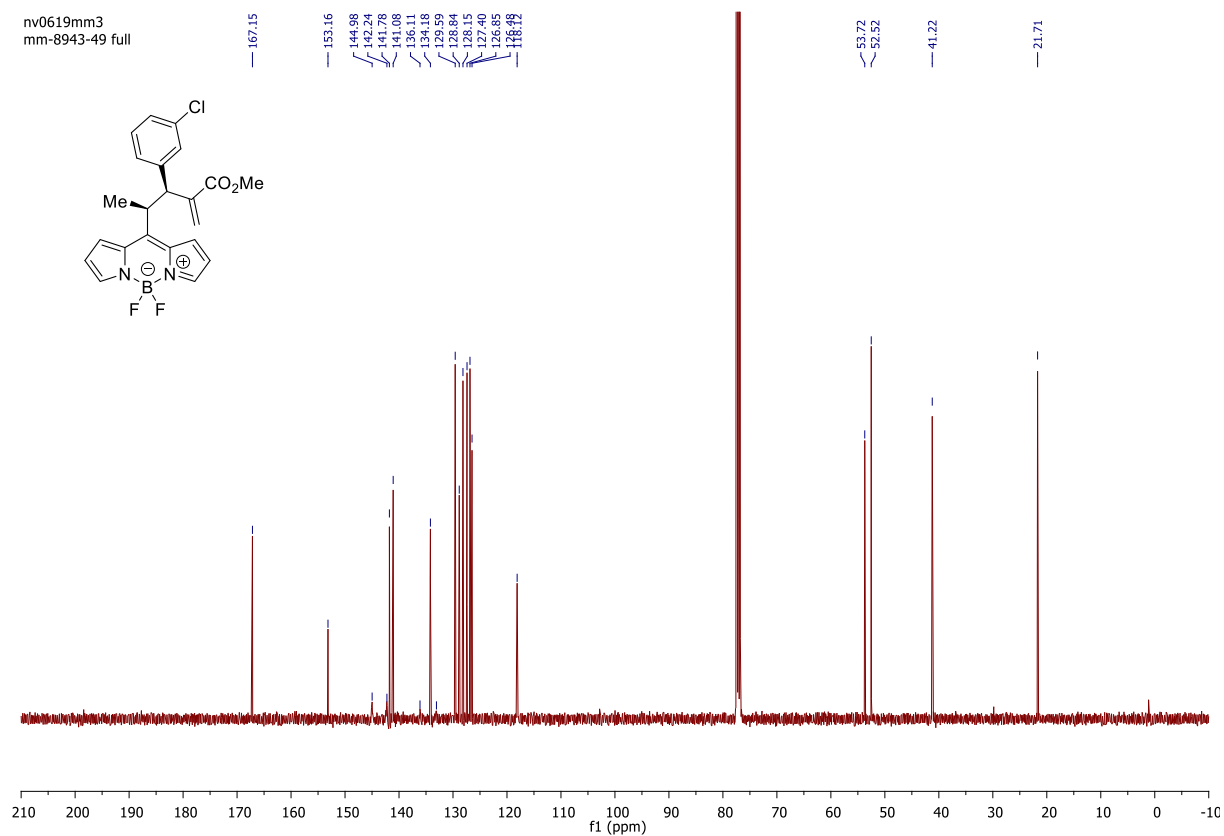

nv0619mm3  
mm-8943-49 full

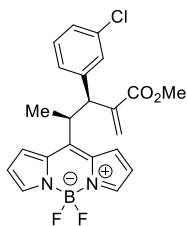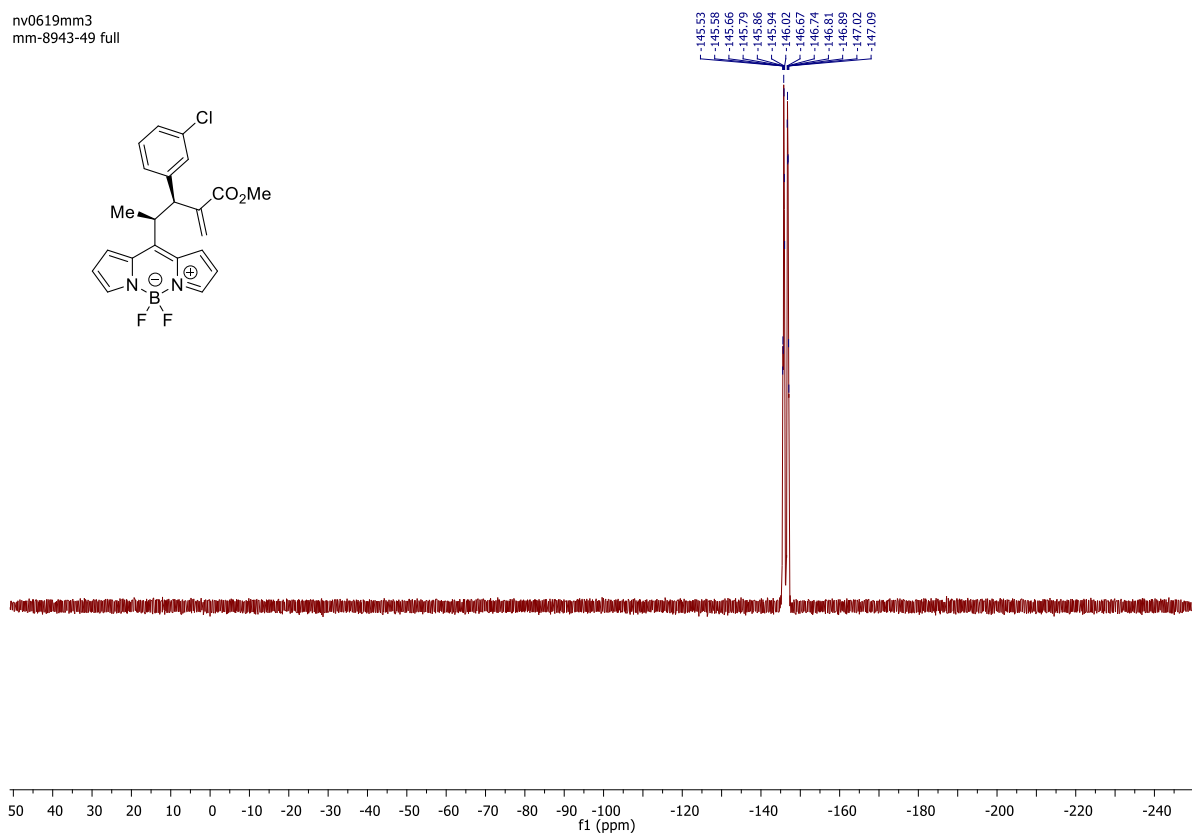

### 3j

dc0219mm4  
mm-8943-70 full

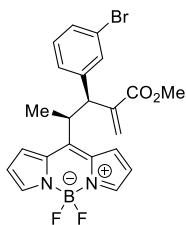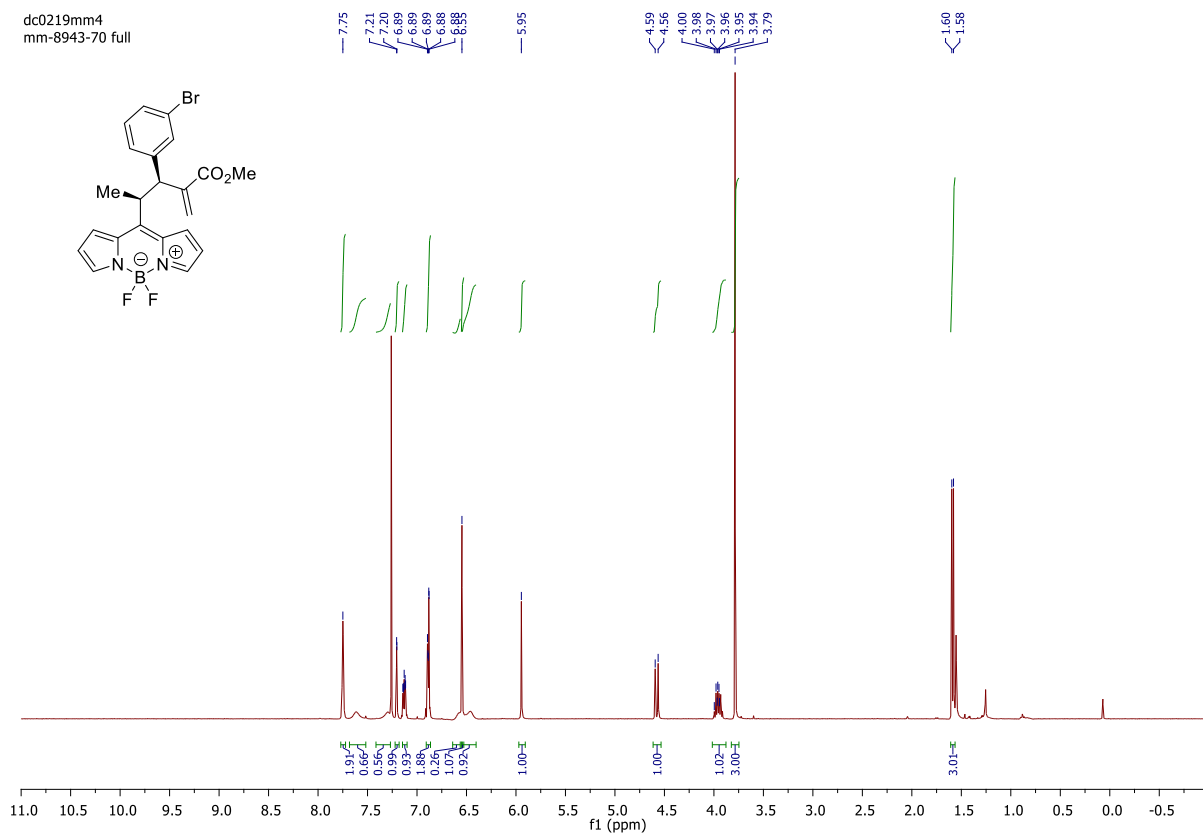

dc0219mm4  
mm-8943-70 full

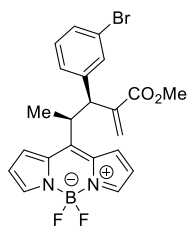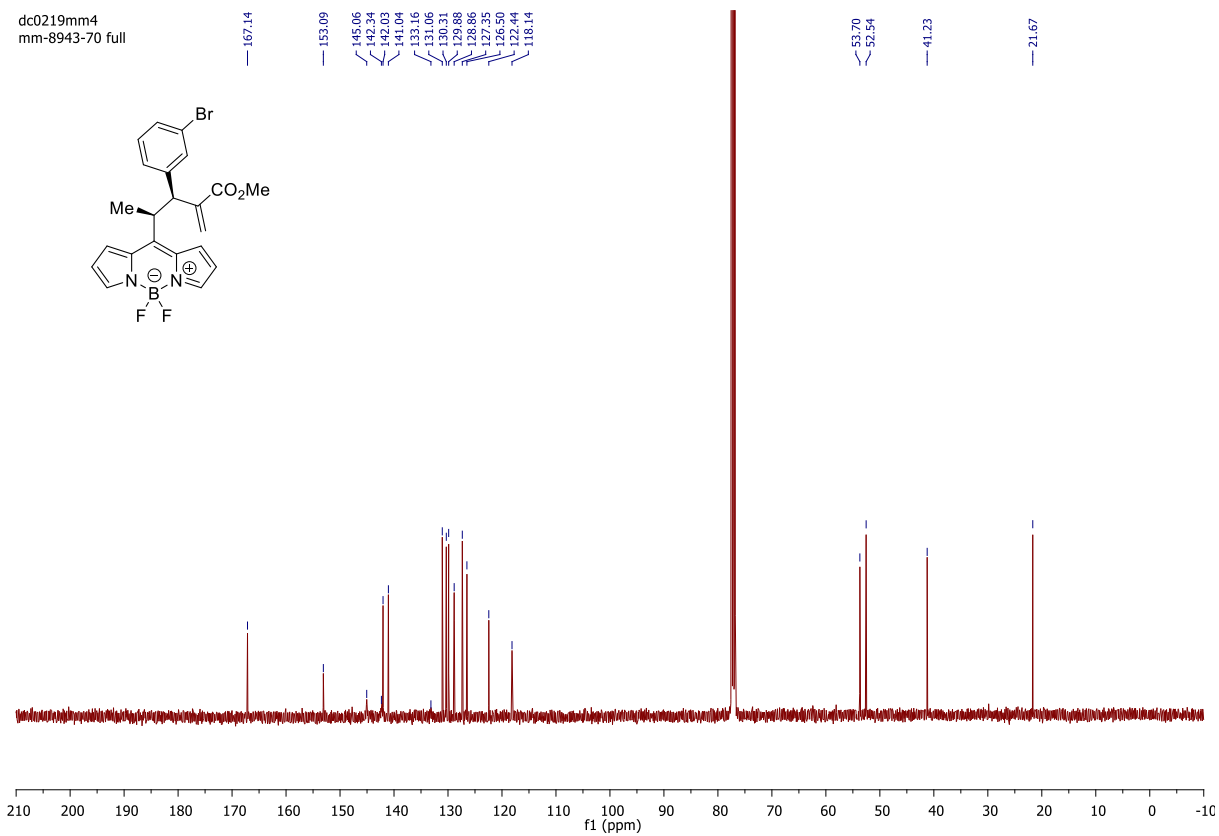

dc0219mm4  
mm-8943-70 full

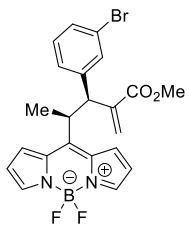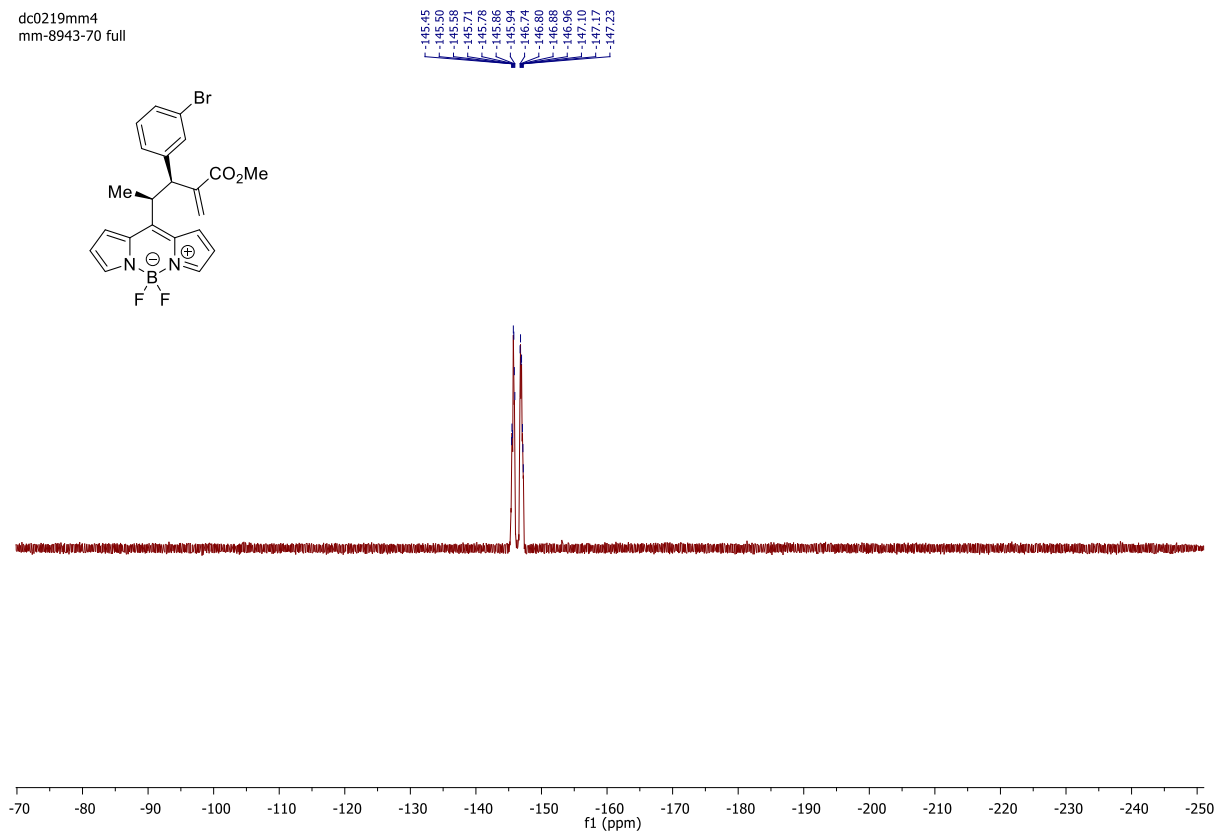

3k

dc1619mm8  
mm-9020-1 full

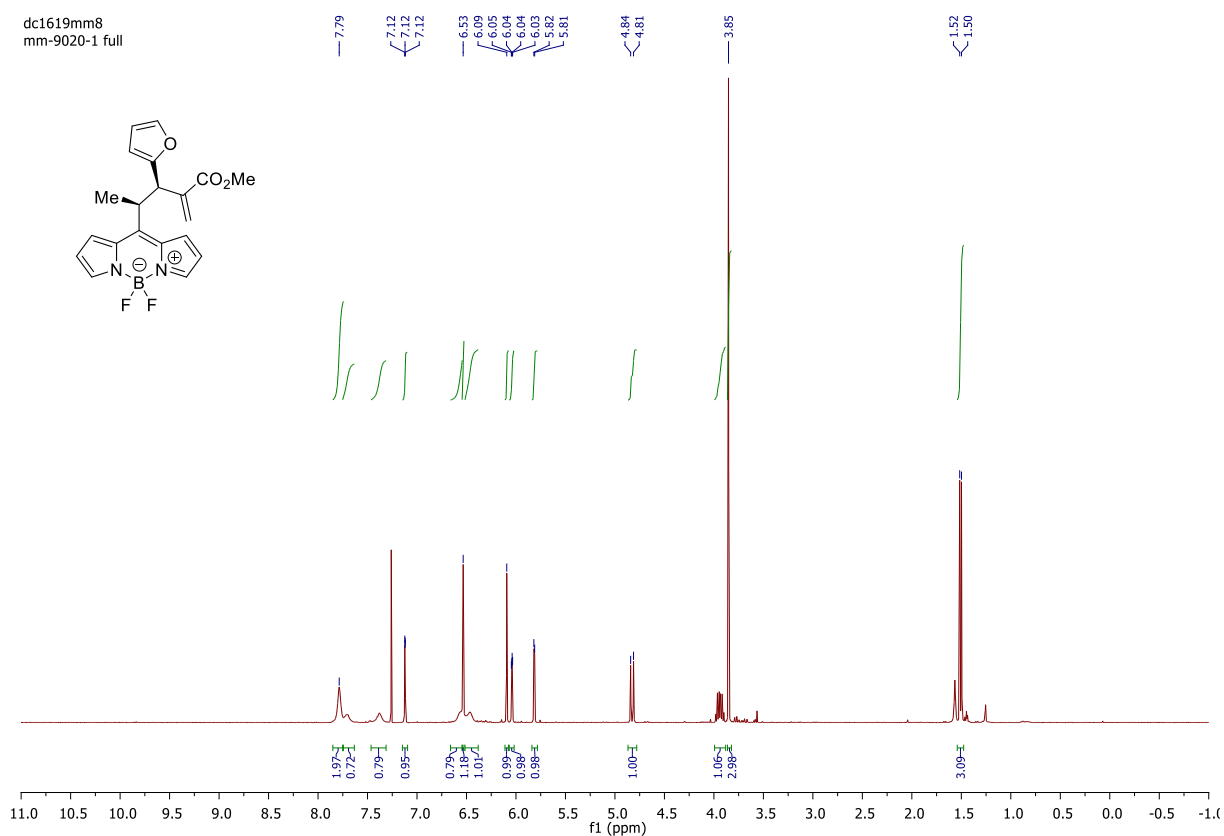

dc1619mm8  
mm-9020-1 full

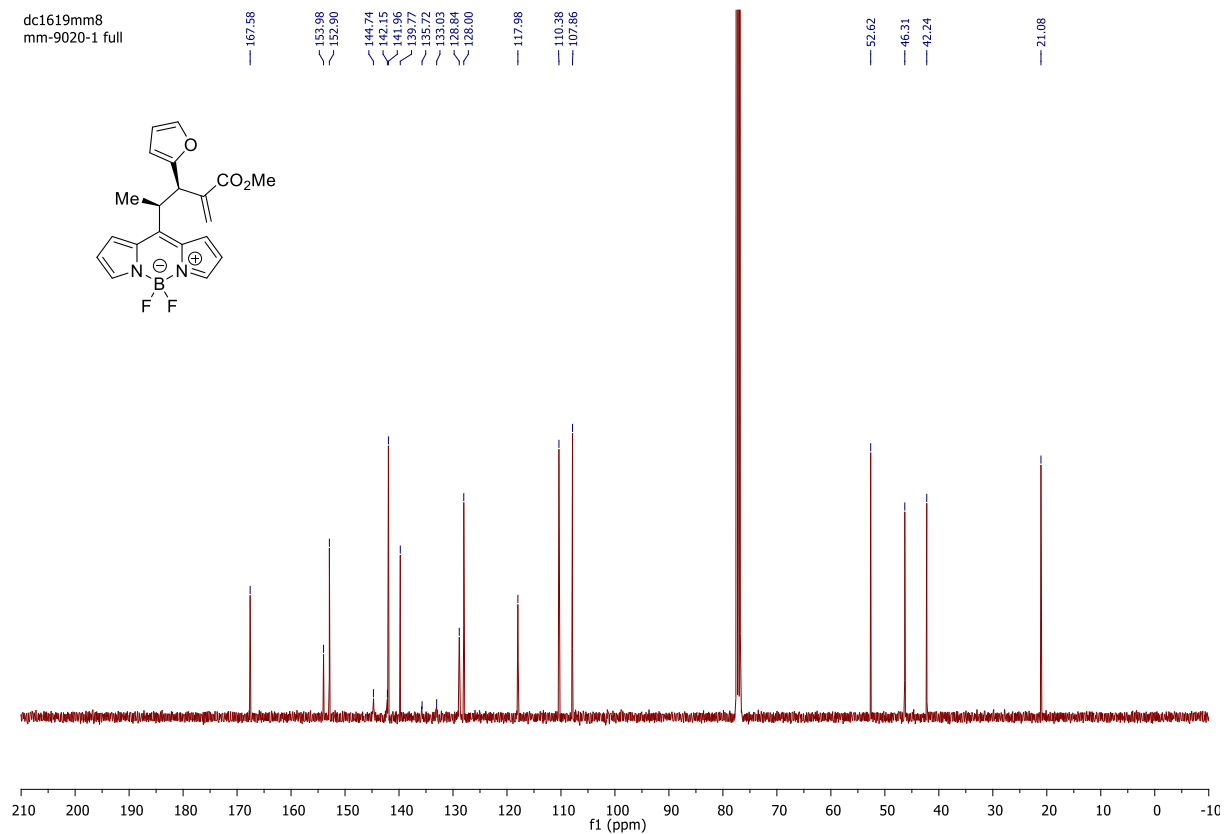

dc1619mm8  
mm-9020-1 full

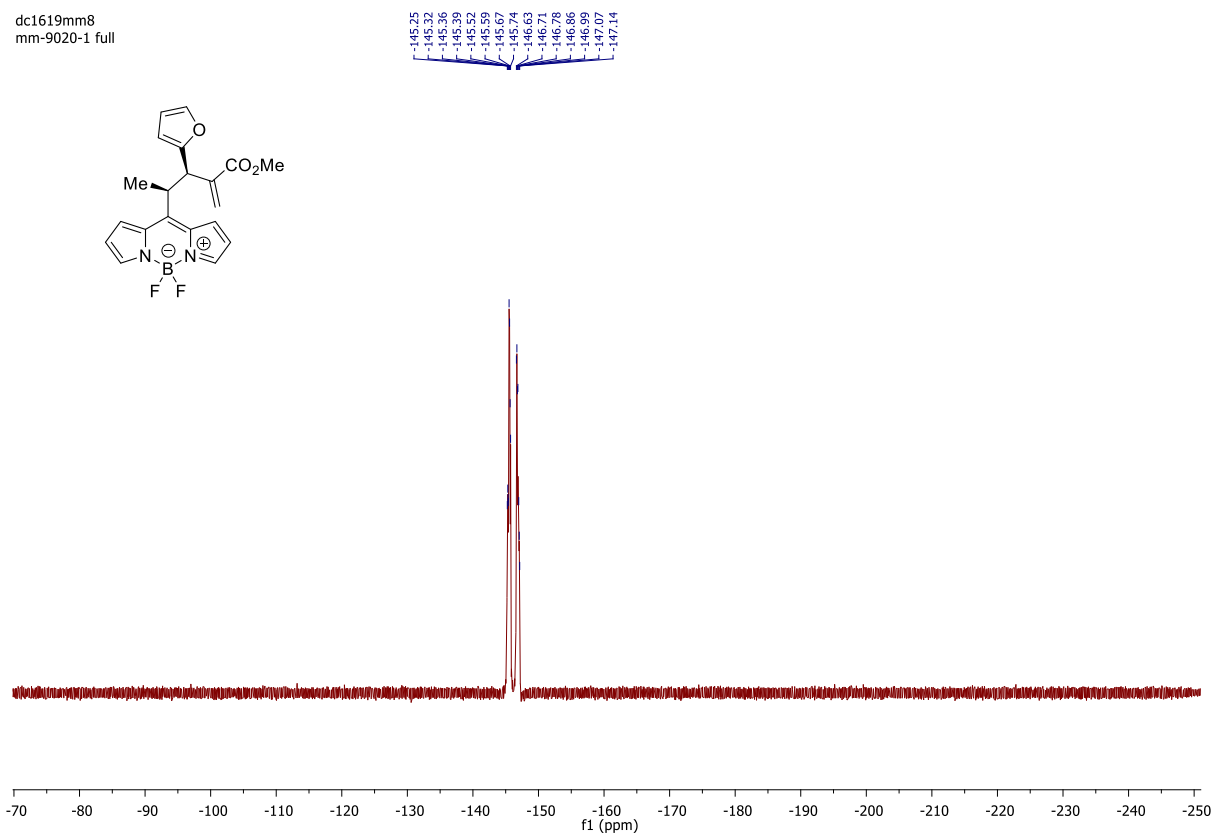

31

fe2420mm1  
mm-9020-43 full

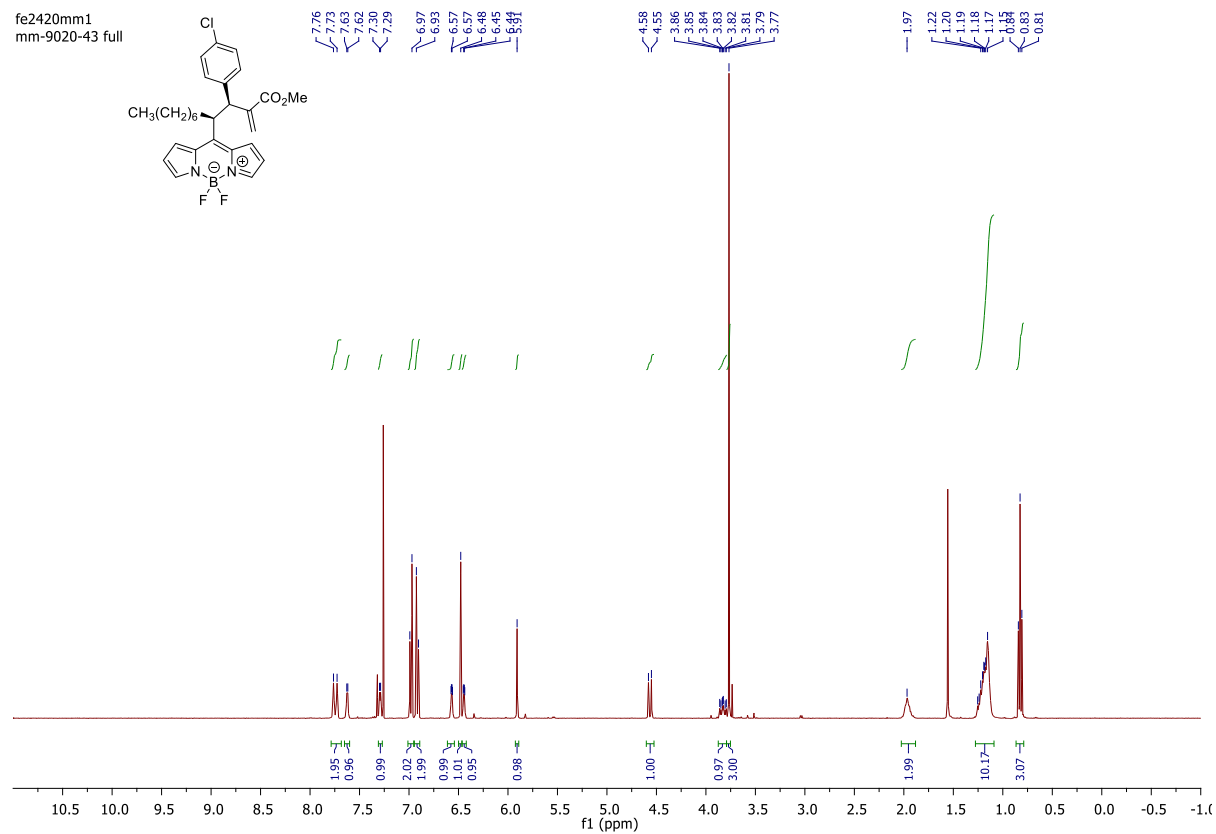

fe2420mm1  
mm-9020-43 full

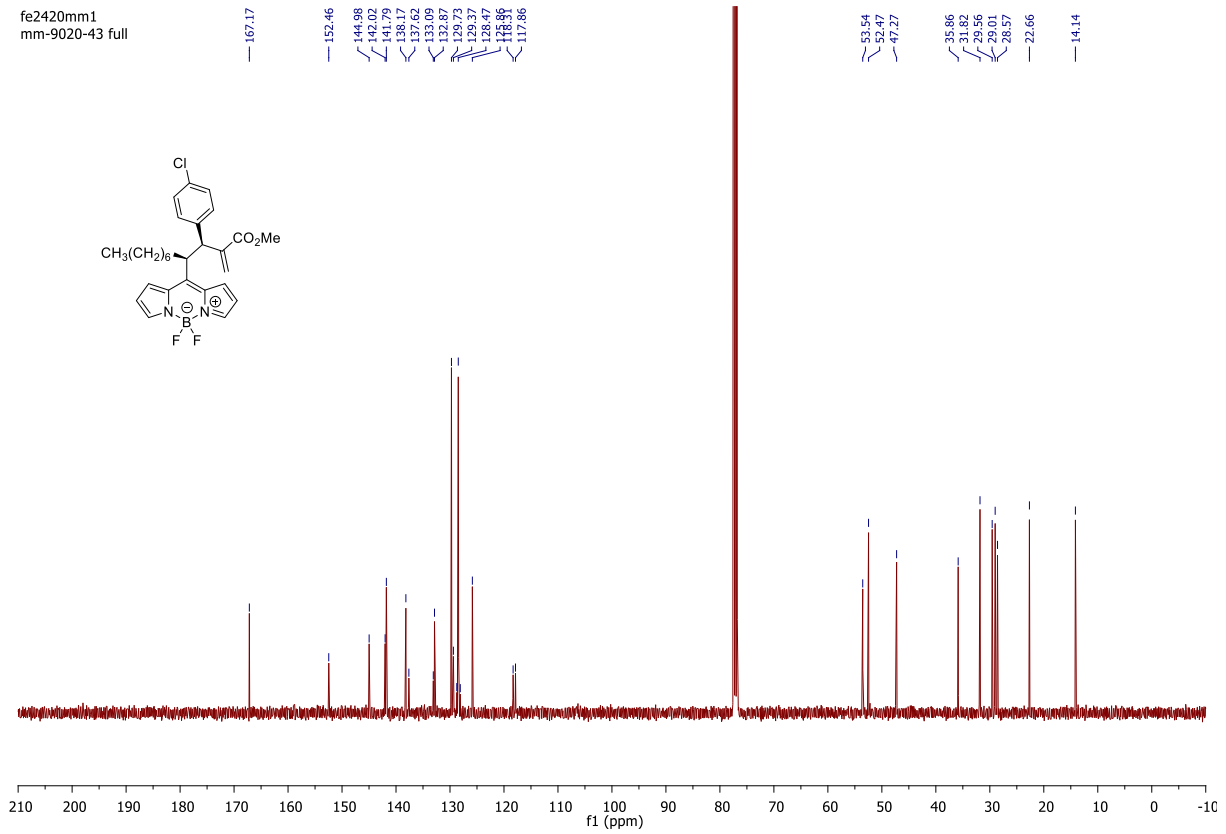

fe2420mm1  
mm-9020-43 full

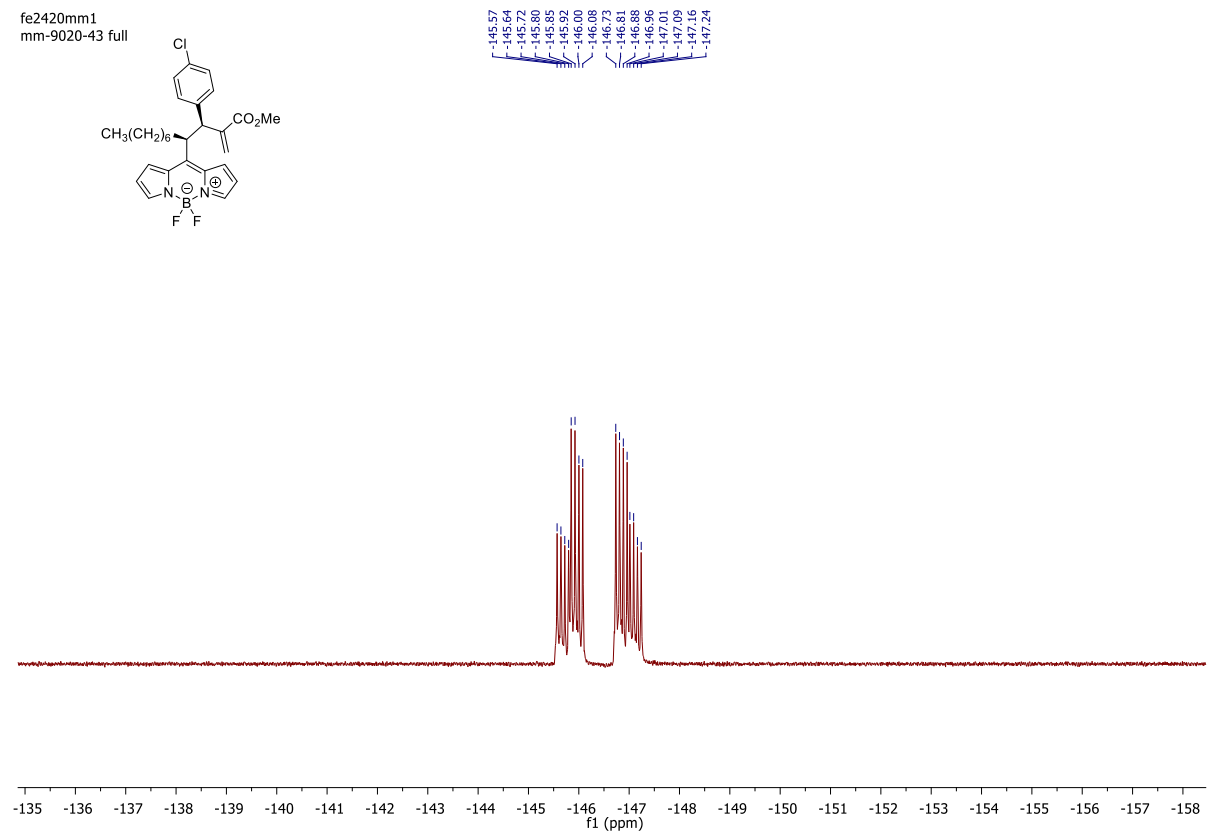

### 3m

dc1019mm4  
mm-8943-88 fc

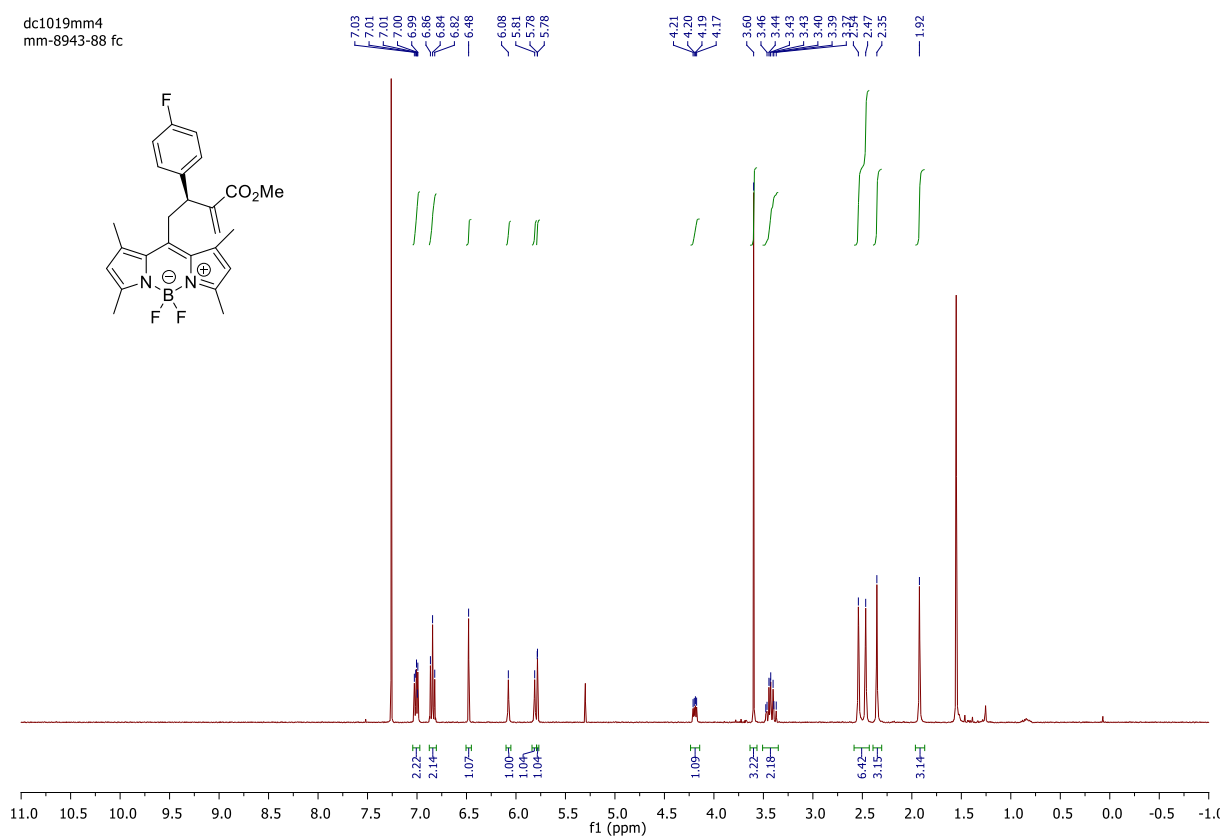

dc0319mm7  
mm-8943-80 fc full

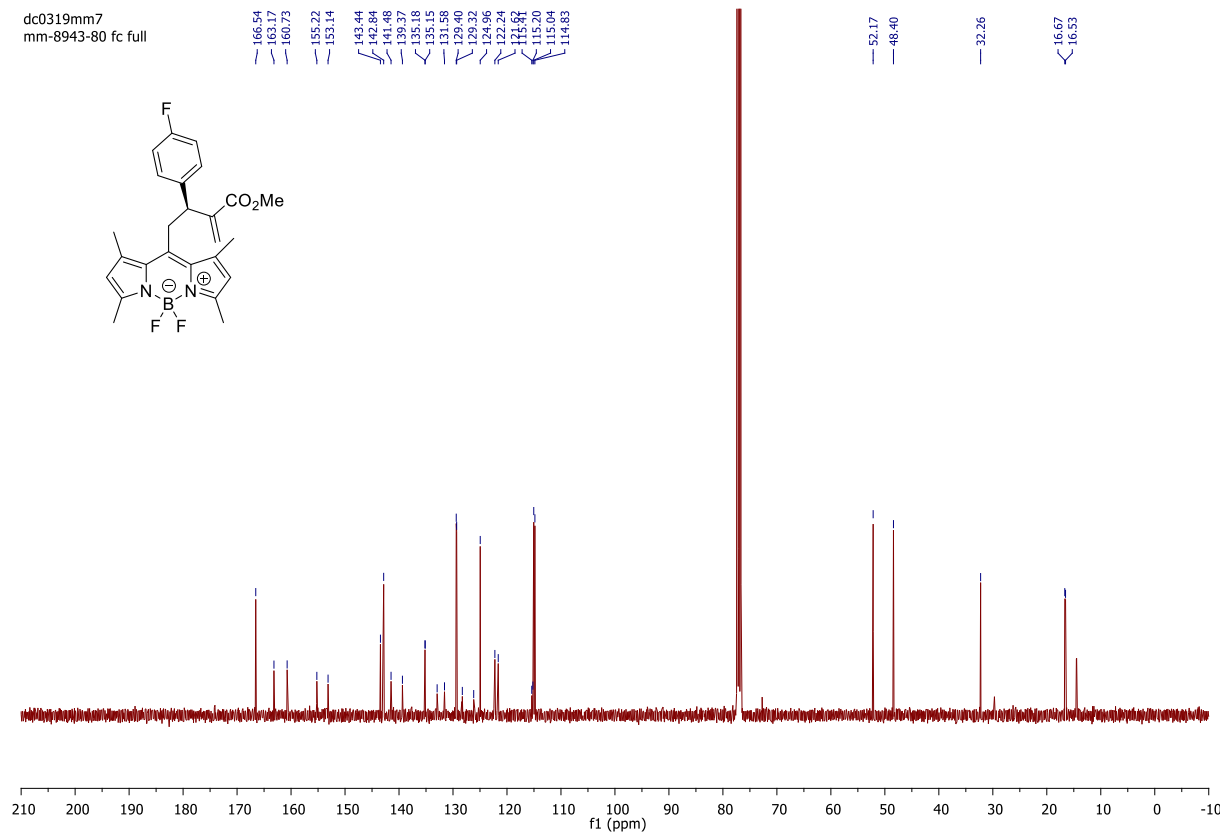

dc0319mm17  
mm-8943-30 fc full

145.83  
145.92  
146.01  
146.12  
146.21  
146.30  
146.39  
147.24  
147.32  
147.41  
147.49  
147.53  
147.61  
147.70

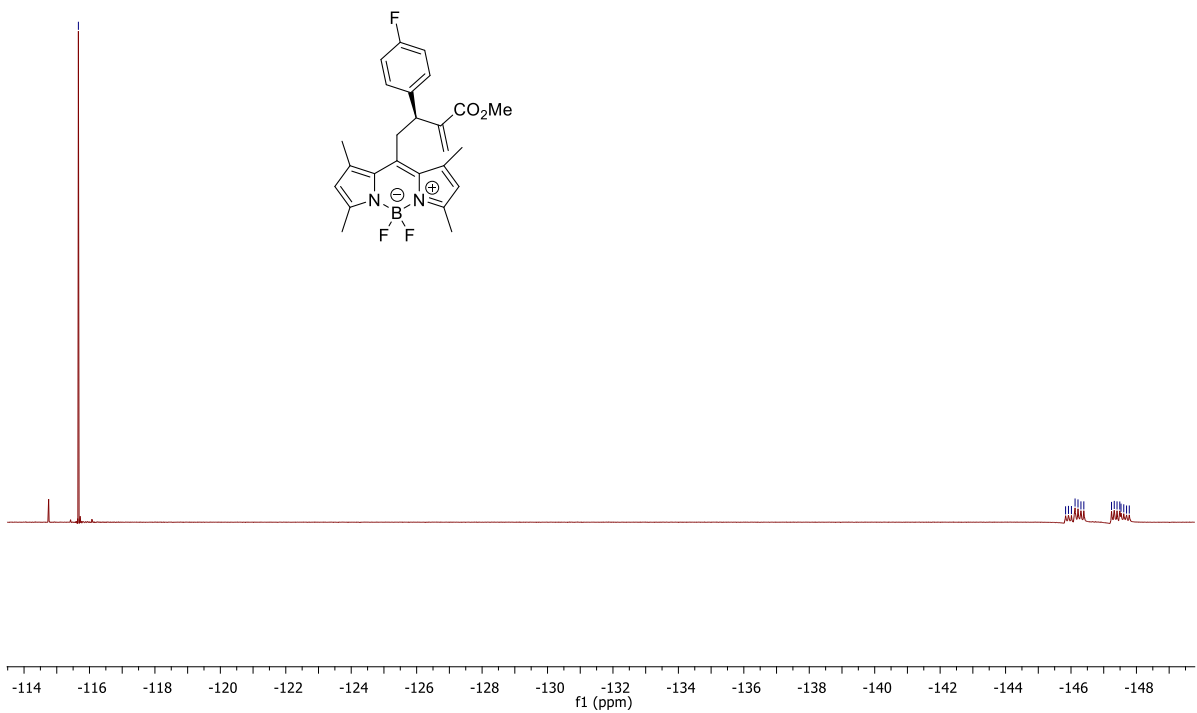

### 3n

ja1419mm1  
mm-9020-4 fc full

7.14  
7.12  
7.00  
6.98  
6.47  
6.07  
5.83  
5.77  
5.77  
4.20  
4.19  
4.18  
4.16  
3.59  
3.47  
3.45  
3.43  
3.43  
3.40  
3.39  
3.37  
3.27  
2.35  
1.93

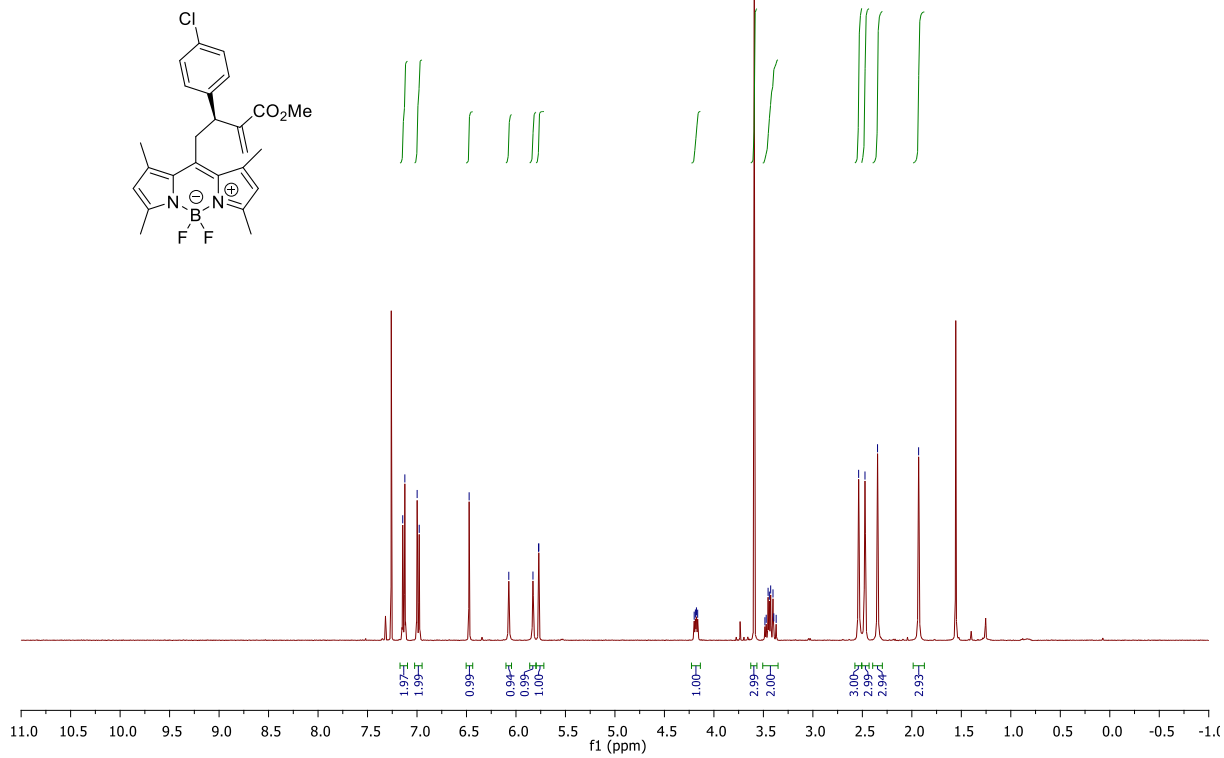



ja1419mm1  
mm-9020-4 fc full

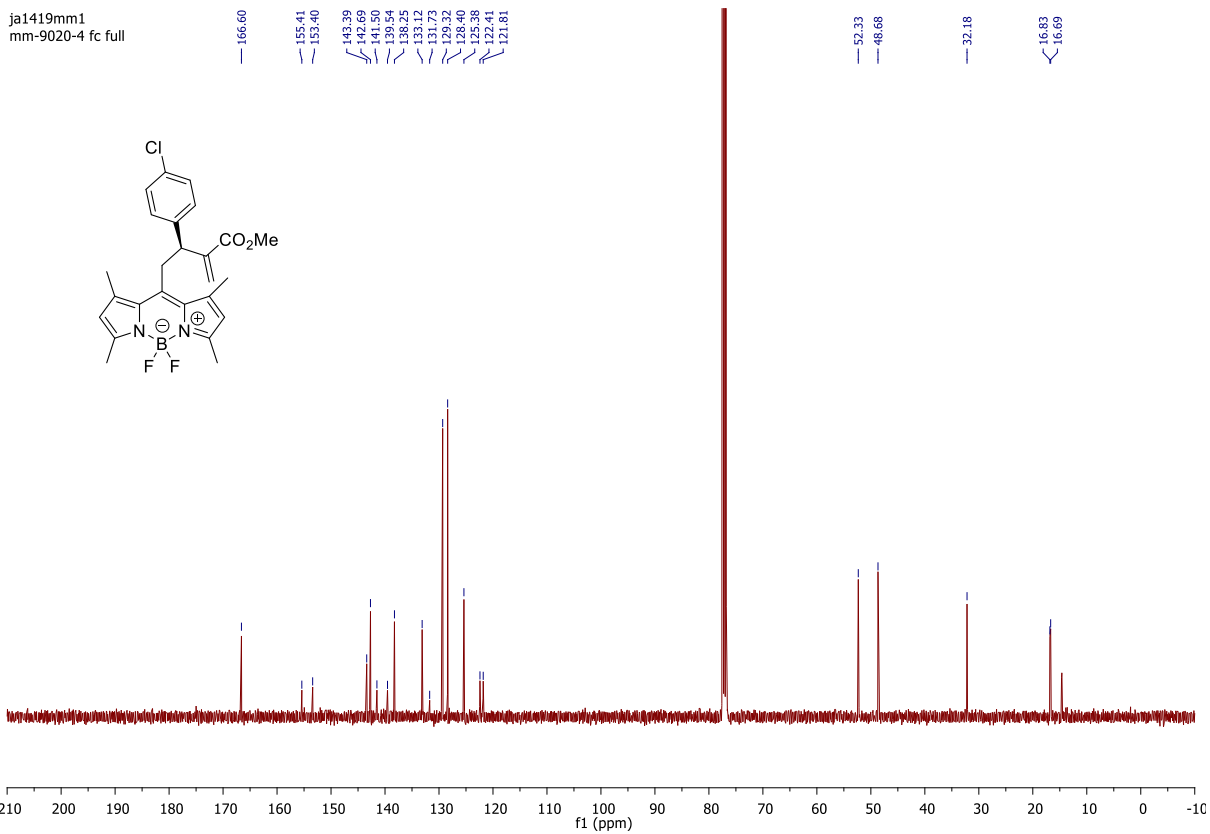

ja1419mm1  
mm-9020-4 fc full

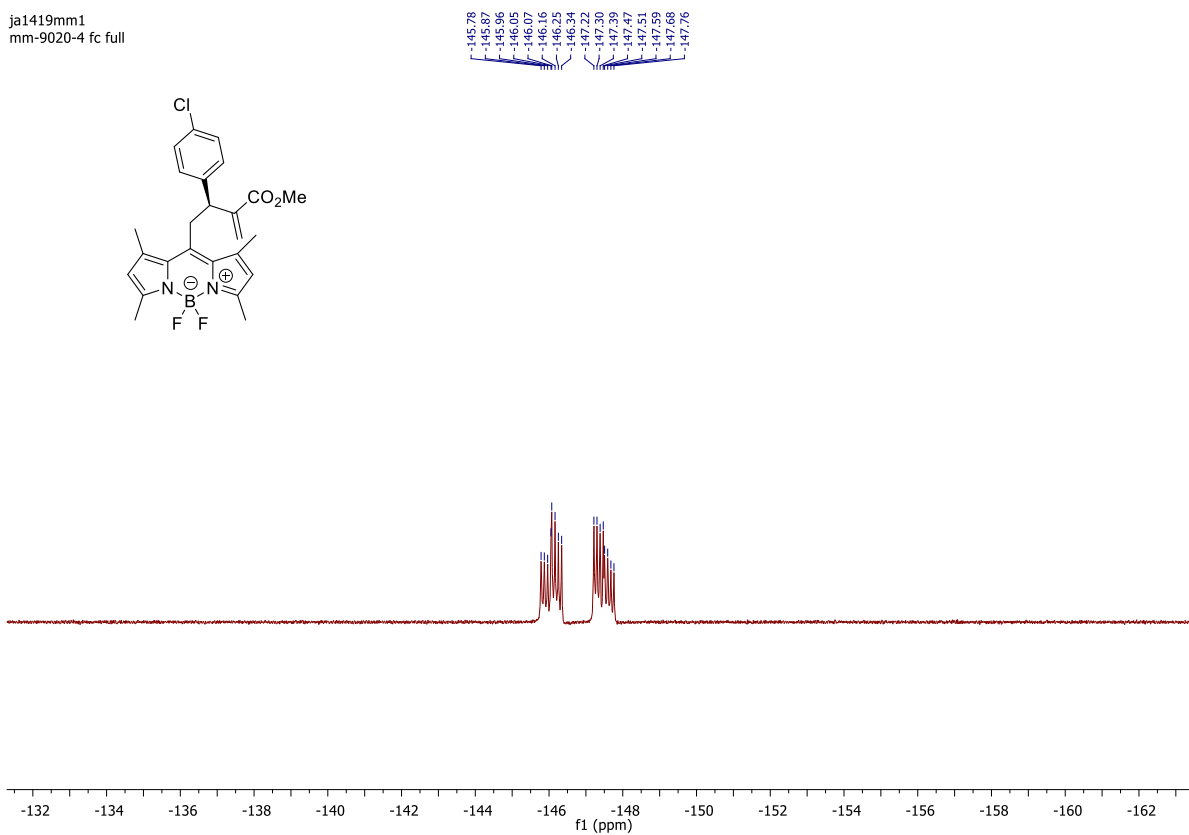

30

fe1720mm12  
mm-9020-31 fc full

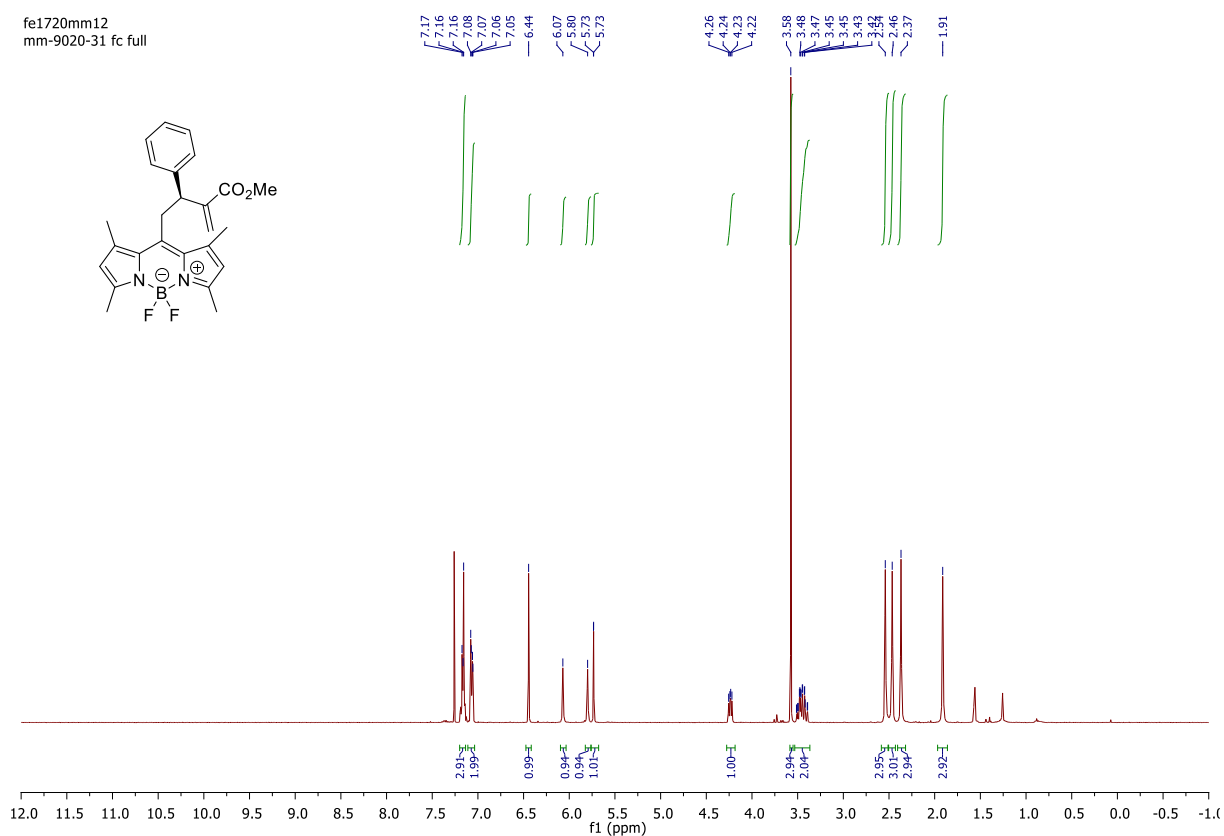

fe1720mm12  
mm-9020-31 fc full

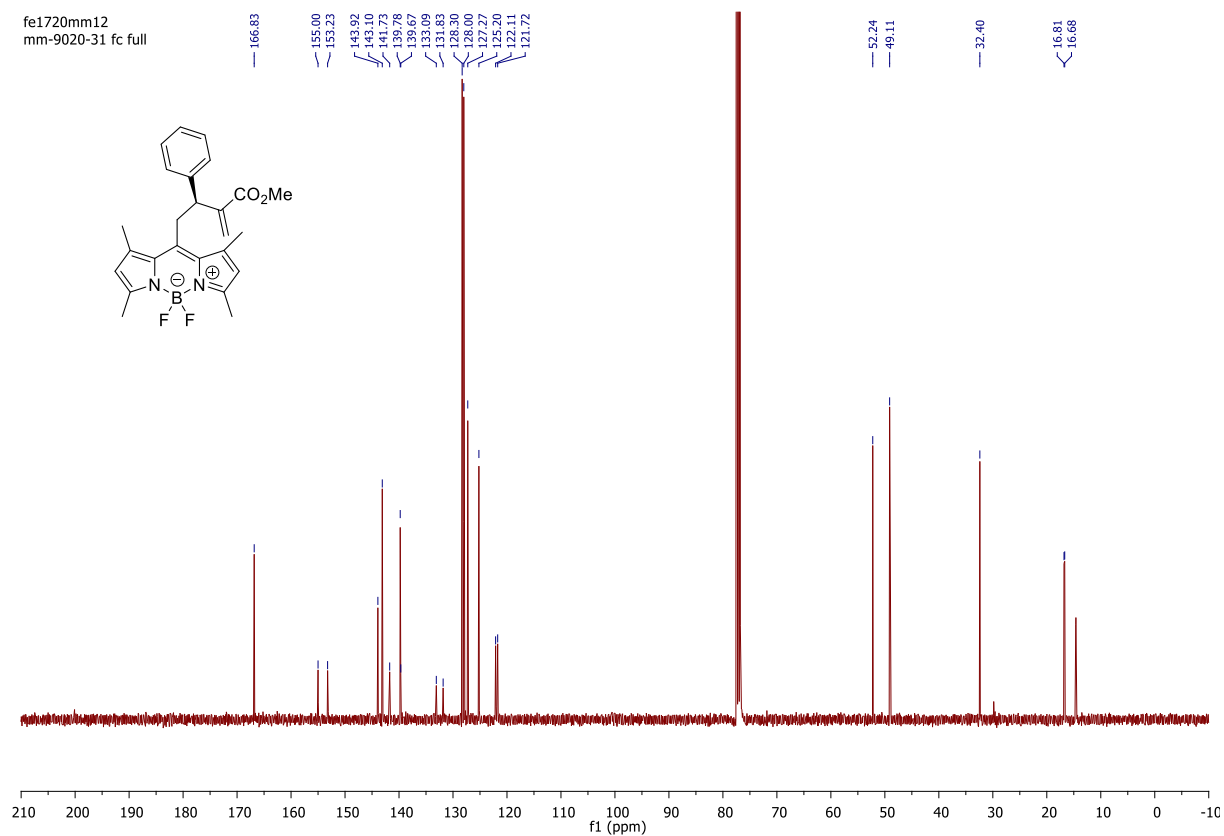

fe1720mm12  
mm-9020-31 fc full

-145.96  
-146.05  
-146.14  
-146.23  
-146.32  
-146.34  
-146.43  
-146.52  
-146.96  
-147.05  
-147.13  
-147.22  
-147.25  
-147.34  
-147.42  
-147.51

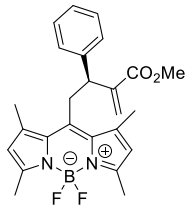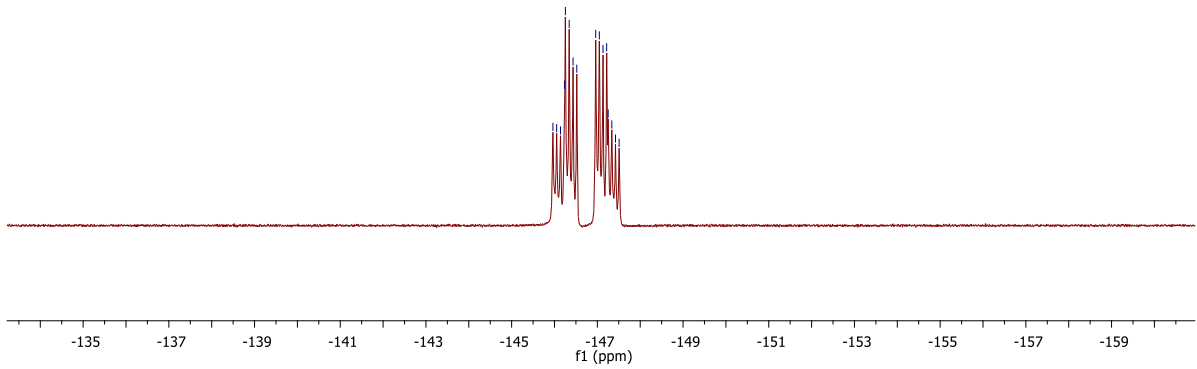

### 3p

ja2320mm5  
mm-9020-8 fc

8.02  
8.00  
7.22  
7.20  
6.59  
6.10  
5.90  
5.90  
5.76  
4.29  
4.27  
4.26  
4.25  
3.61  
3.53  
3.52  
3.50  
3.48  
3.47  
3.44  
3.43  
3.43  
2.51  
2.45  
2.35  
1.91

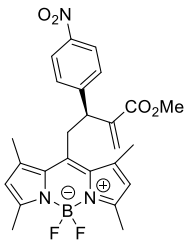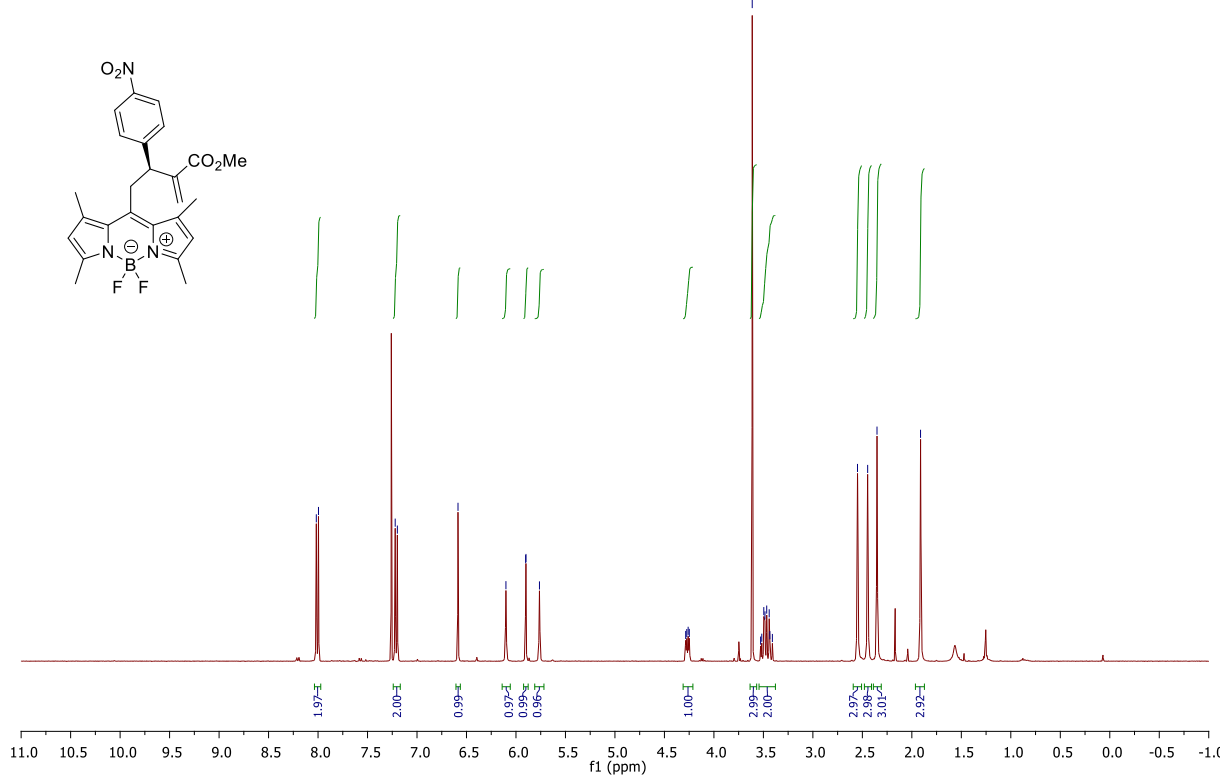

ja2320mm5  
mm-9020-8 fc

166.22  
155.81  
153.85  
147.22  
142.50  
141.75  
140.94  
139.85  
138.85  
131.69  
128.83  
127.46  
126.18  
123.40  
122.60  
122.00

52.46  
49.29  
31.79  
16.93  
16.54  
14.67

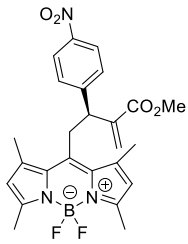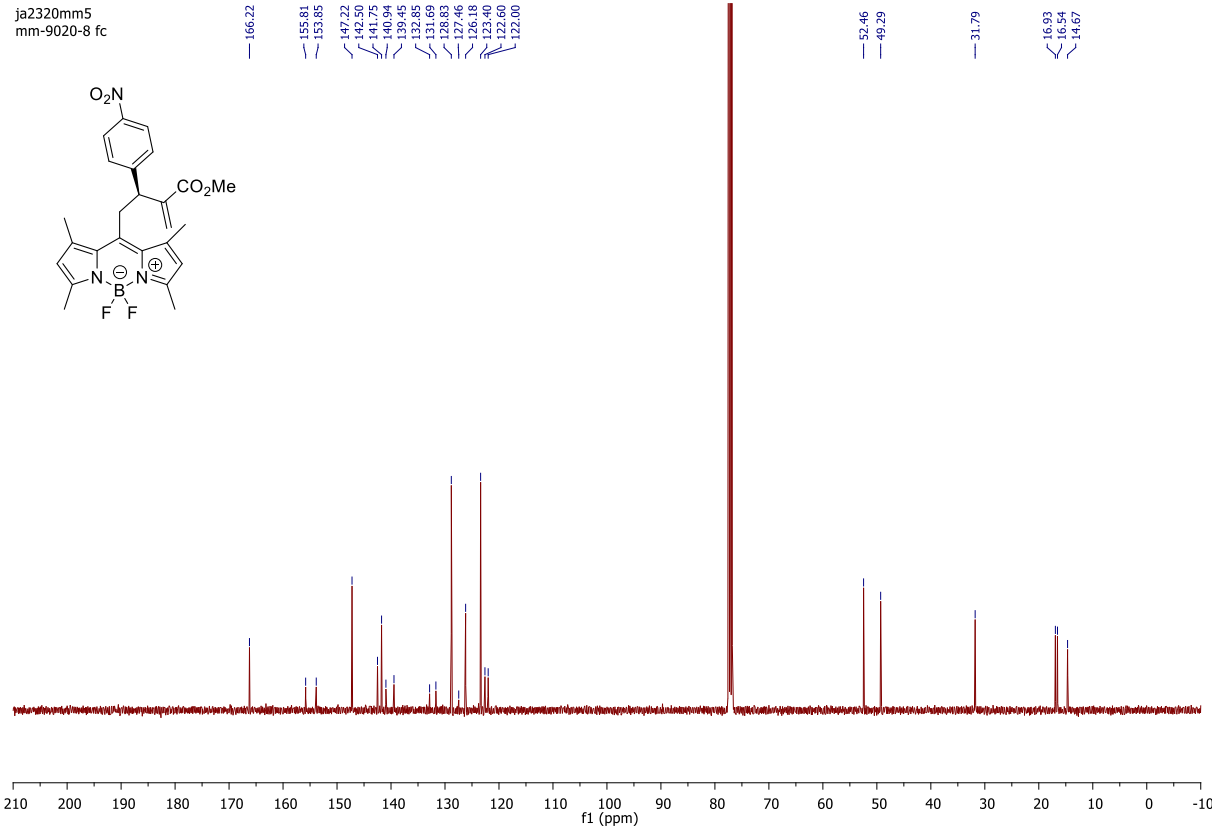

ja2320mm5  
mm-9020-8 fc

145.49  
145.58  
145.67  
145.76  
145.85  
145.87  
146.05  
147.56  
147.65  
147.73  
147.81  
147.85  
147.92  
148.02  
148.10

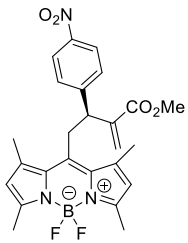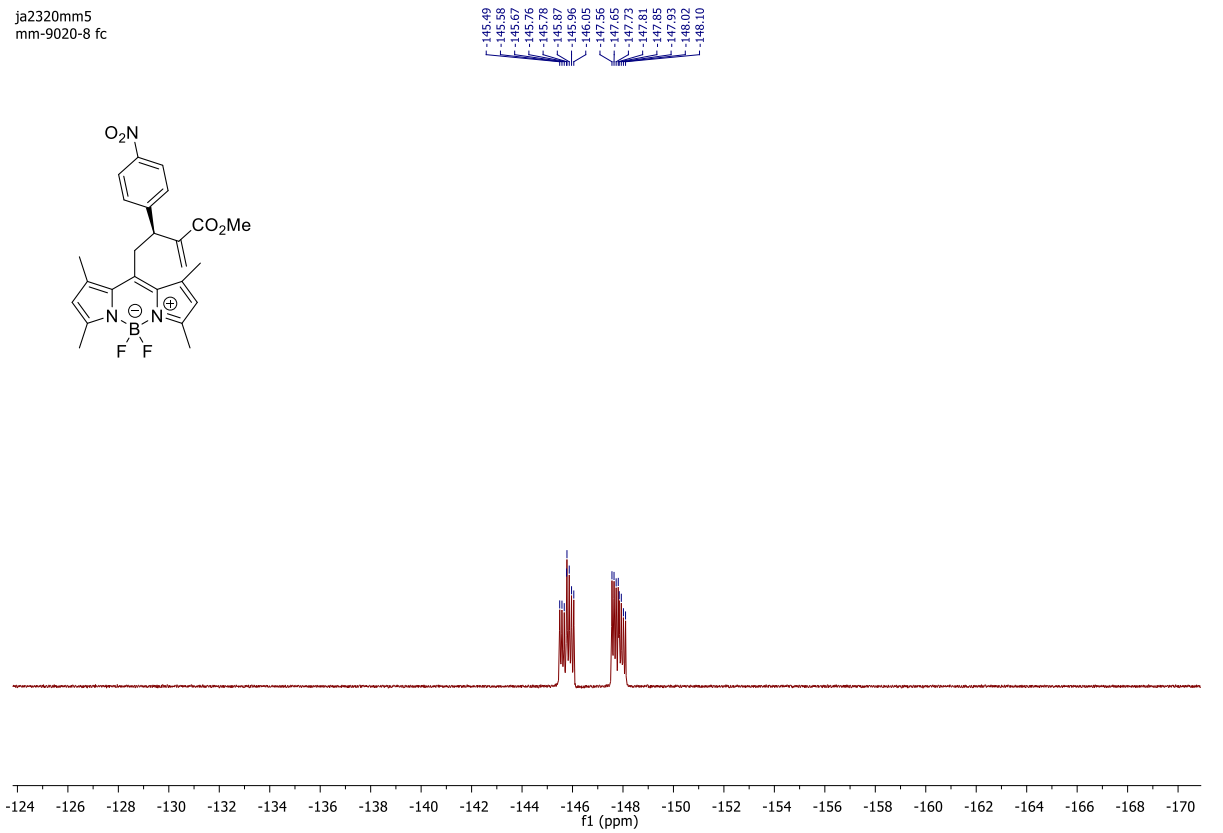

3q

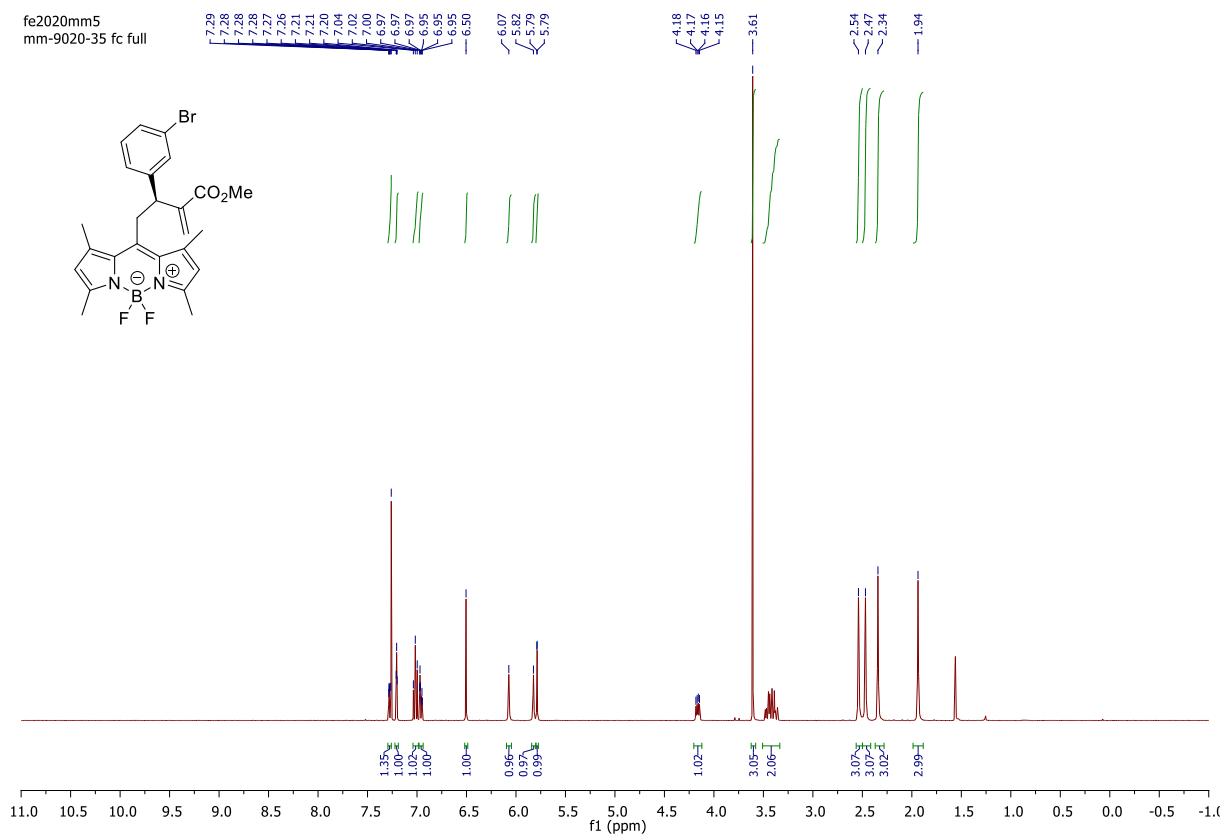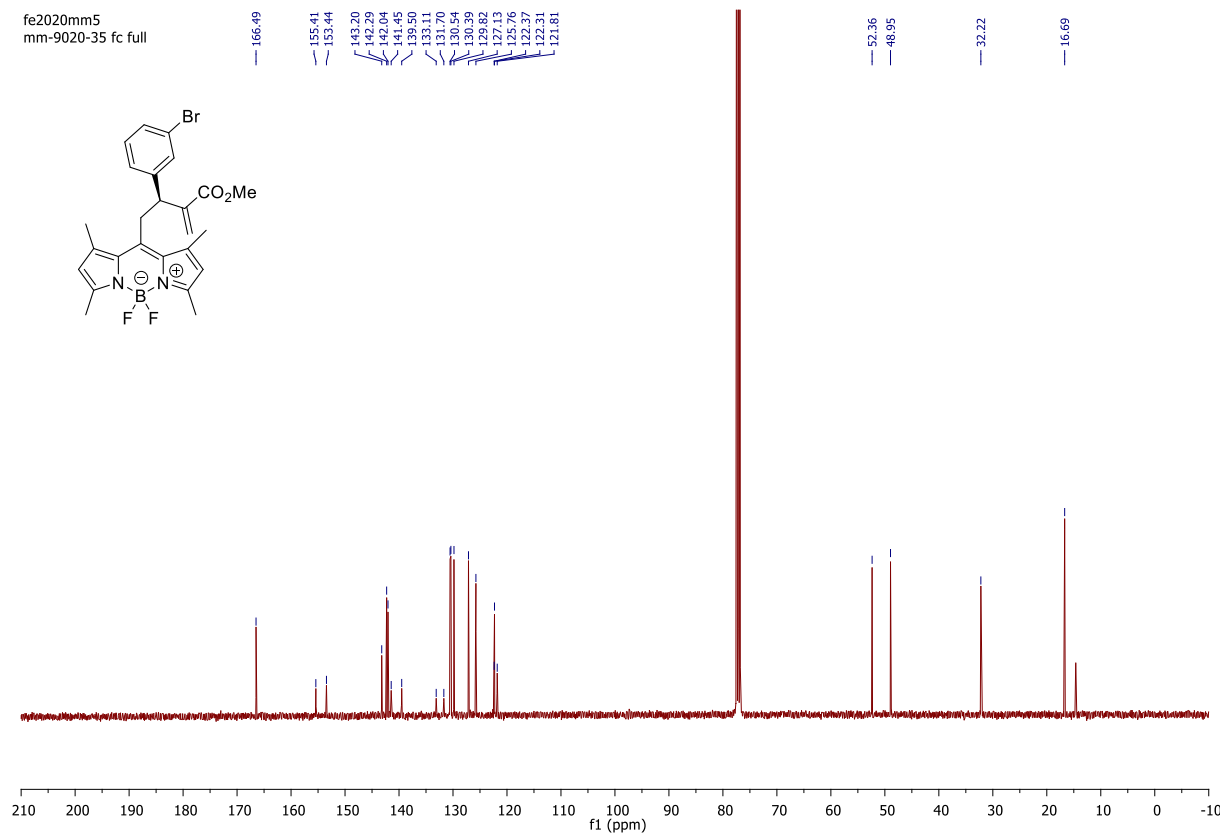

fe2020mm5  
mm-9020-35 fc full

-145.82  
-145.91  
-146.00  
-146.09  
-146.11  
-146.20  
-146.38  
-147.11  
-147.20  
-147.28  
-147.37  
-147.40  
-147.49  
-147.57  
-147.66

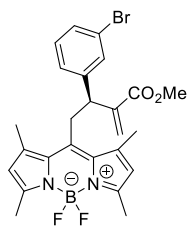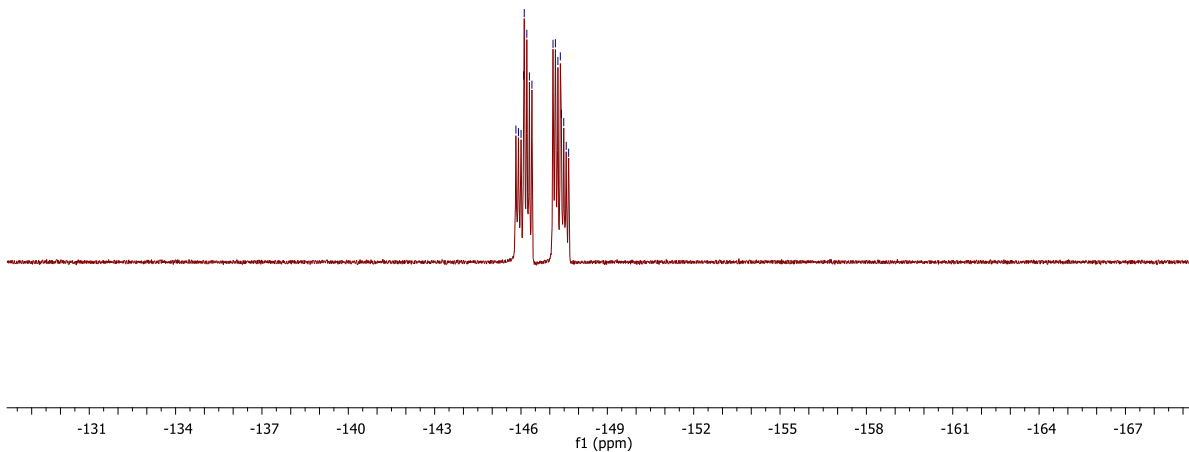

### 3r

fe2120mm7  
mm-9020-40 fc full

7.14  
7.12  
6.95  
6.93  
6.48  
5.77  
4.09  
4.08  
4.07  
3.59  
2.63  
2.41  
2.40  
2.02

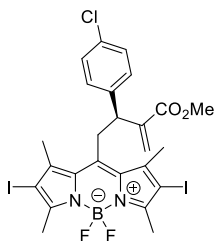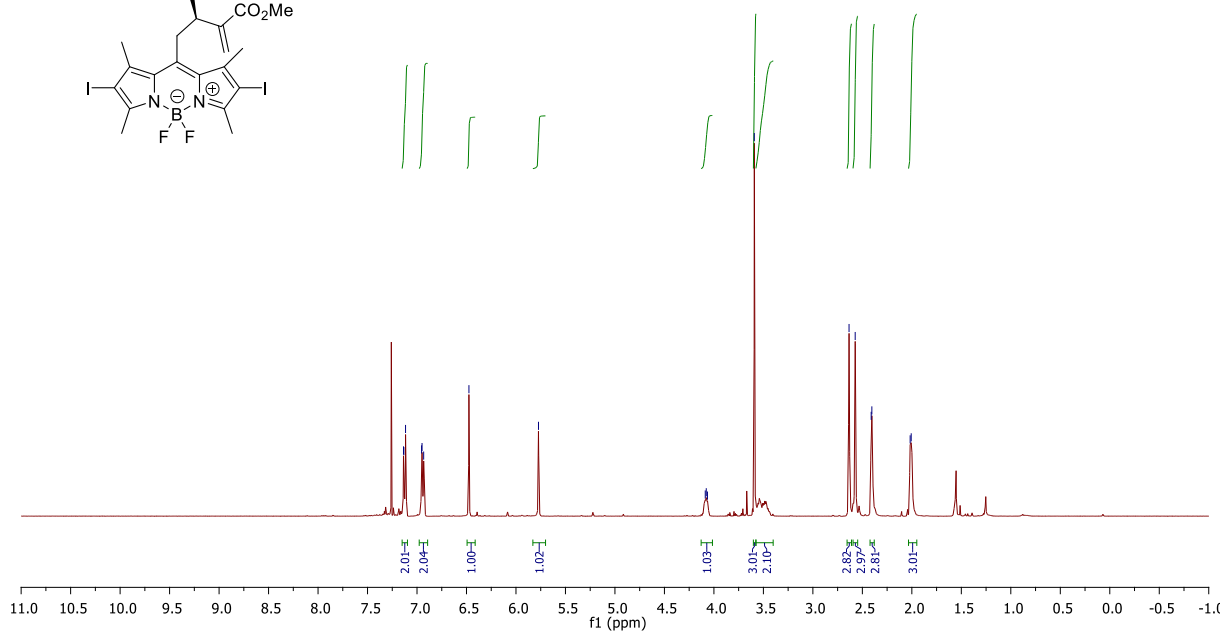

fe2120mm7  
mm-9020-40 fc full

166.41  
156.57  
154.95  
143.40  
143.27  
142.12  
137.80  
133.80  
133.44  
133.08  
131.74  
129.10  
128.63  
128.43  
125.64

52.37  
48.99  
33.09  
19.65  
19.28  
16.28

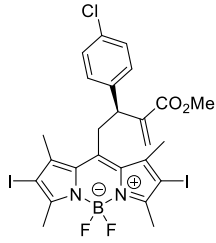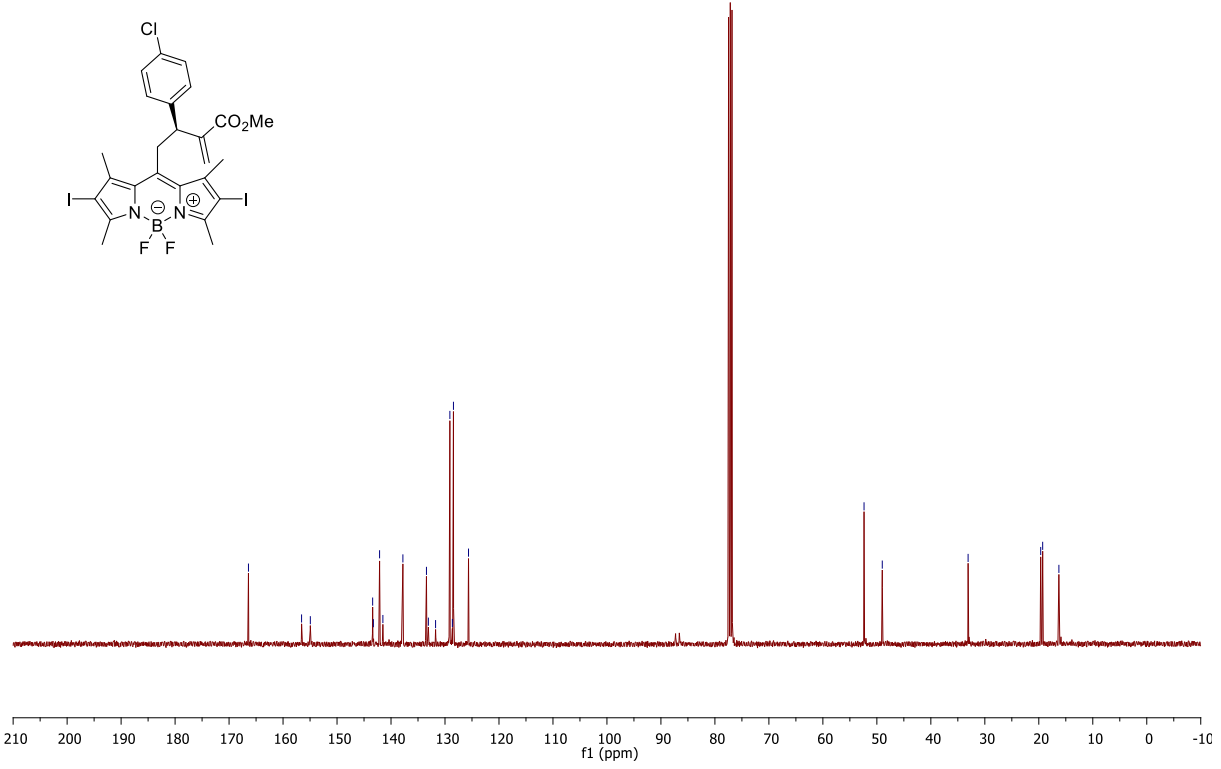

fe2120mm7  
mm-9020-40 fc full

145.34  
145.39  
145.51  
145.62  
145.70  
145.76  
145.79  
145.85  
145.88  
146.07  
146.17  
146.35  
146.43  
146.47  
146.50

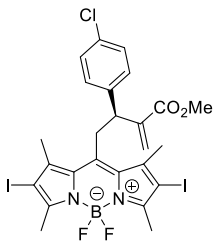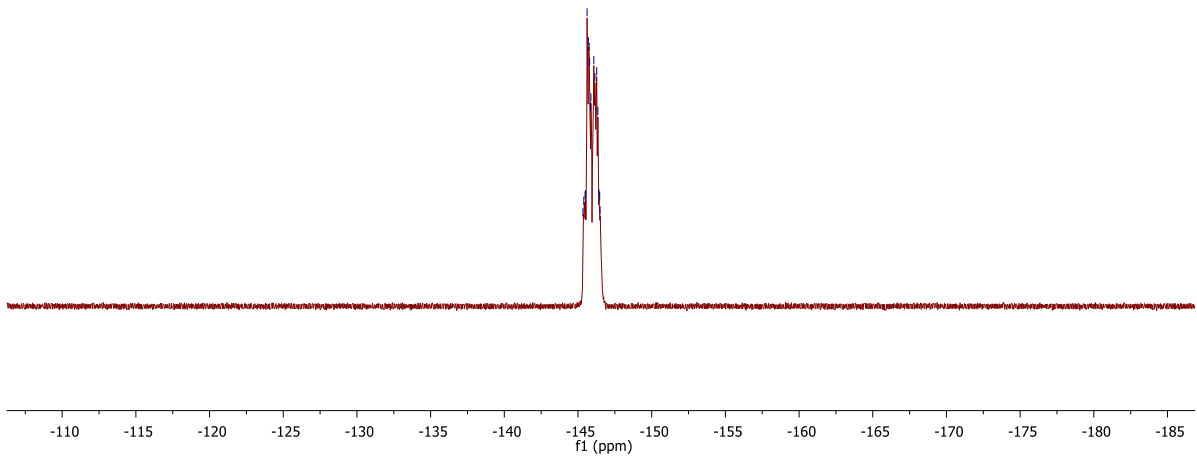

3s

ma0320mm6  
mm-9020-46 f1 full

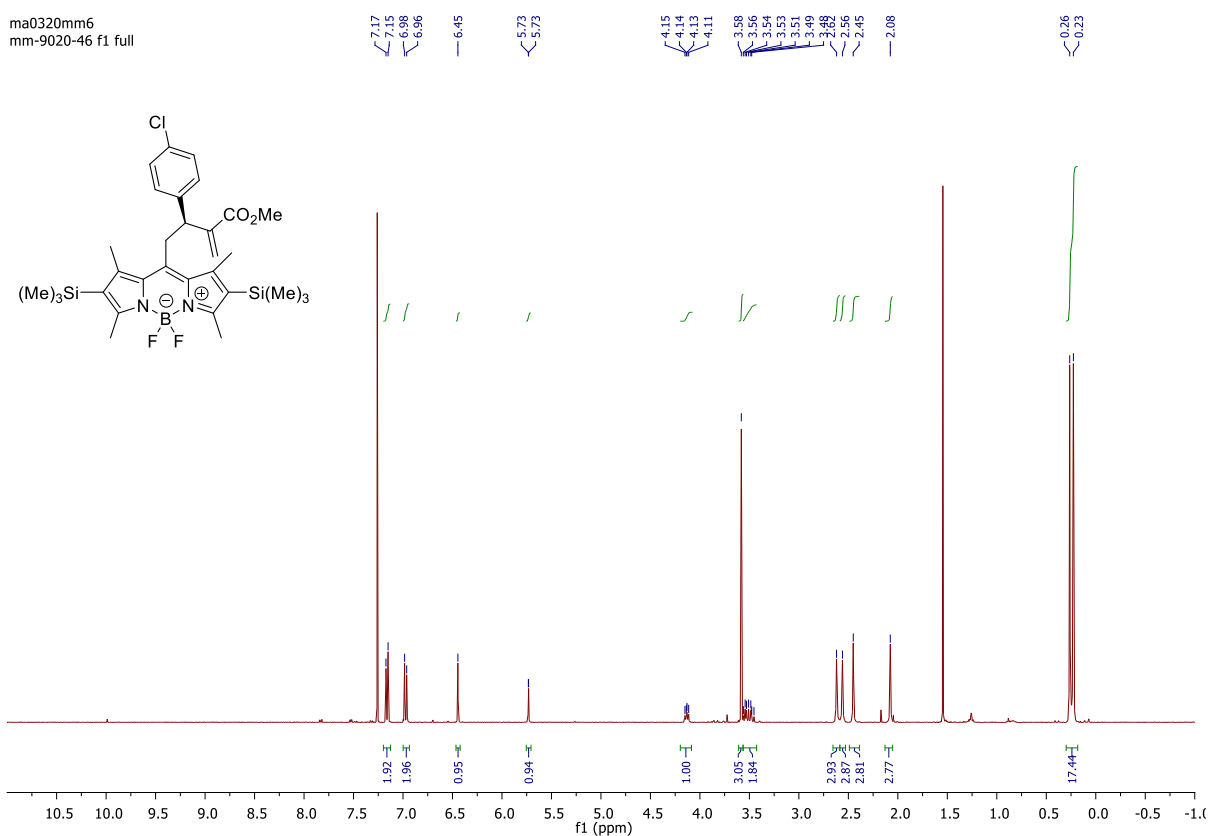

ma0320mm6  
mm-9020-46 f1 full

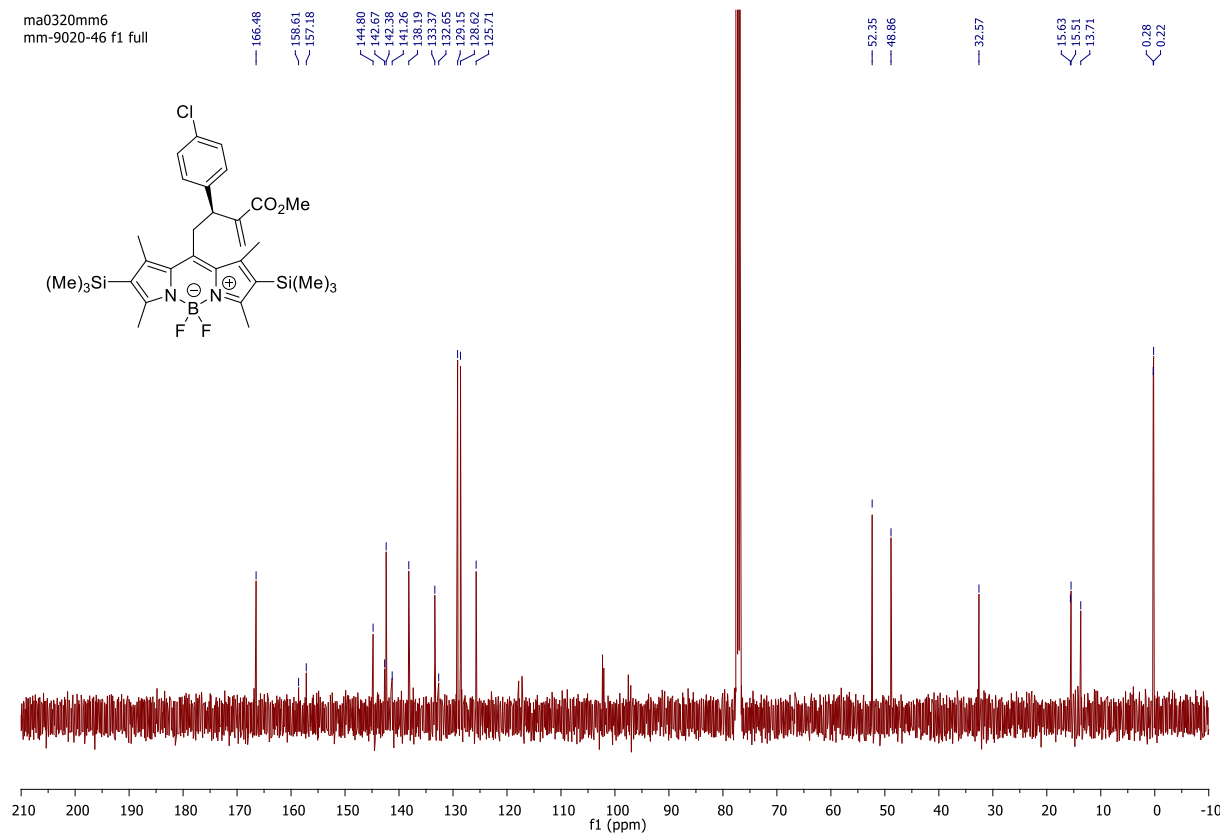



ma0320mm6  
mm-9020-46 f1 full

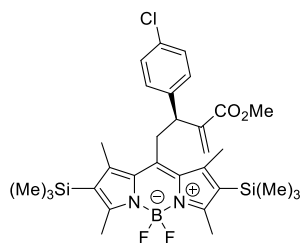

-146.00  
-146.08  
-146.16  
-146.26  
-146.28  
-146.37  
-146.46  
-146.54  
-147.33  
-147.41  
-147.49  
-147.57  
-147.61  
-147.69  
-147.77  
-147.86

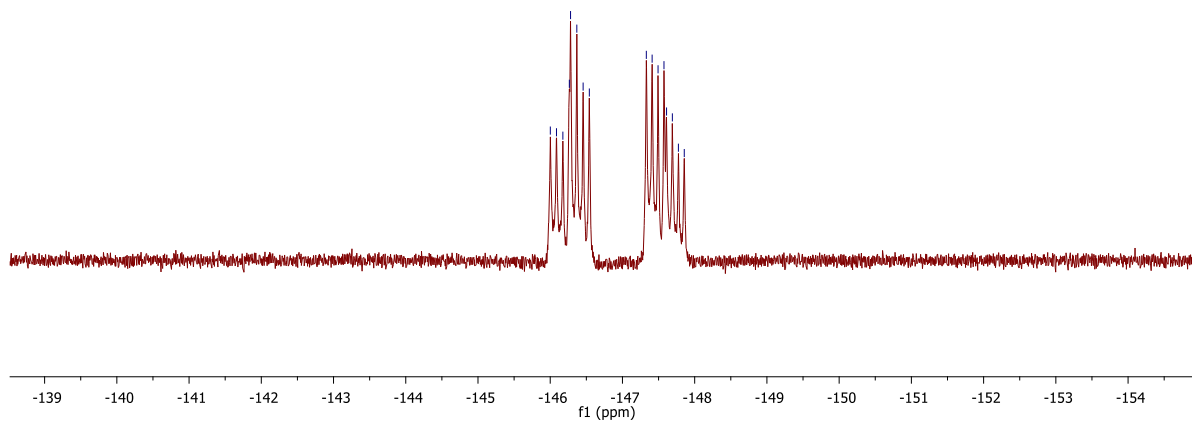

## HPLC traces

### 3a racemic

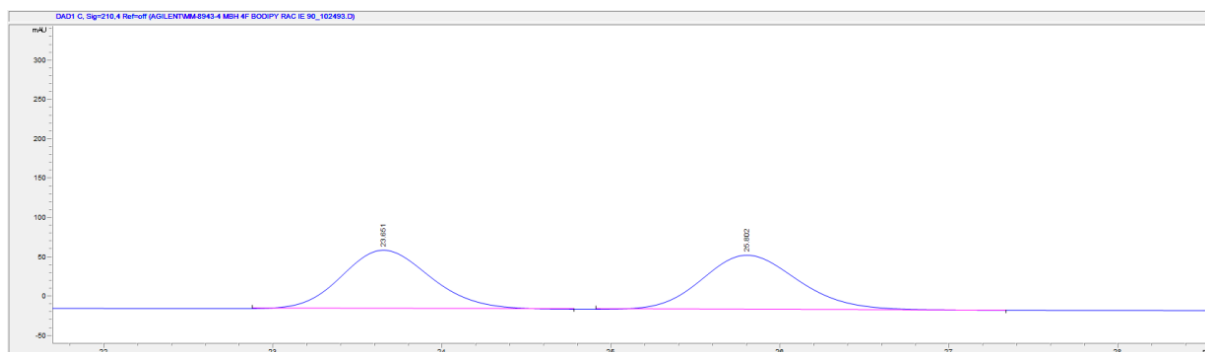

| Peak # | RetTime [min] | Type | Width [min] | Area [mAU*s] | Height [mAU] | Area %  |
|--------|---------------|------|-------------|--------------|--------------|---------|
| 1      | 23.651        | BB   | 0.5614      | 2728.31079   | 74.46984     | 49.8298 |
| 2      | 25.802        | BB   | 0.5976      | 2746.94971   | 69.12315     | 50.1702 |

### 3a quinine

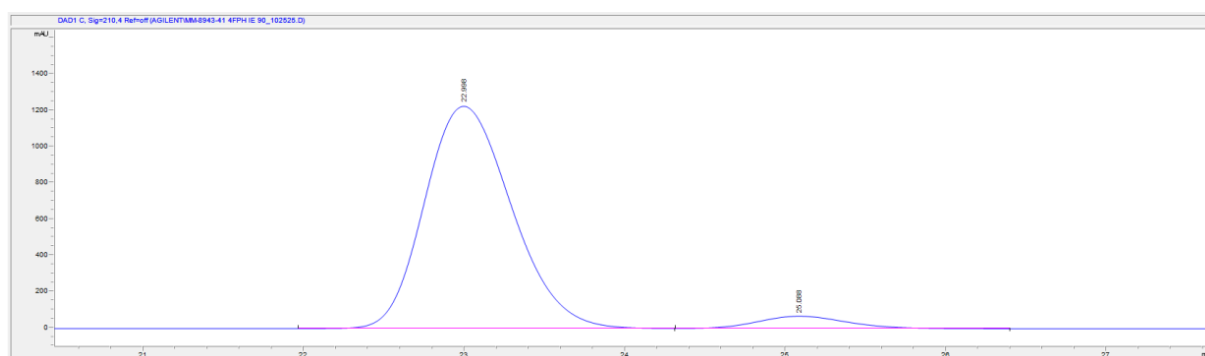

| Peak # | RetTime [min] | Type | Width [min] | Area [mAU*s] | Height [mAU] | Area %  |
|--------|---------------|------|-------------|--------------|--------------|---------|
| 1      | 22.998        | BB   | 0.5913      | 4.62685e4    | 1228.77905   | 94.6683 |
| 2      | 25.088        | BB   | 0.5849      | 2605.83350   | 68.02283     | 5.3317  |

### 3a cinchonine

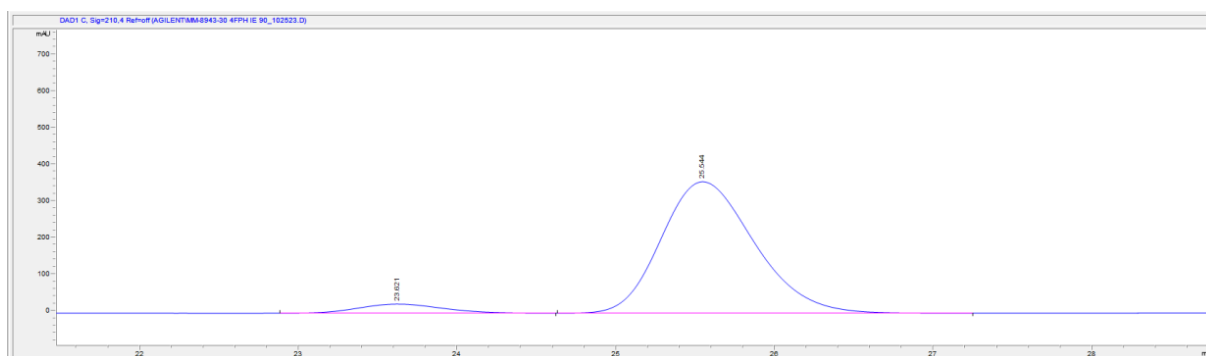

| Peak # | RetTime [min] | Type | Width [min] | Area [mAU*s] | Height [mAU] | Area %  |
|--------|---------------|------|-------------|--------------|--------------|---------|
| 1      | 23.621        | BB   | 0.5682      | 925.71619    | 24.98757     | 5.9353  |
| 2      | 25.544        | BB   | 0.6346      | 1.46711e4    | 359.13065    | 94.0647 |

### 3b racemic

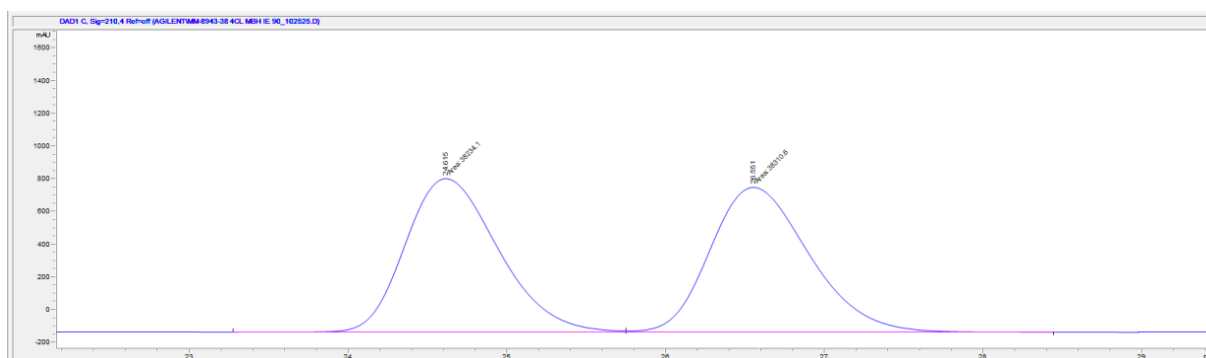

| Peak # | RetTime [min] | Type | Width [min] | Area [mAU*s] | Height [mAU] | Area %  |
|--------|---------------|------|-------------|--------------|--------------|---------|
| 1      | 24.615        | MM   | 0.6789      | 3.82341e4    | 938.56268    | 49.9500 |
| 2      | 26.551        | MM   | 0.7213      | 3.83106e4    | 885.18628    | 50.0500 |

### 3b quinine

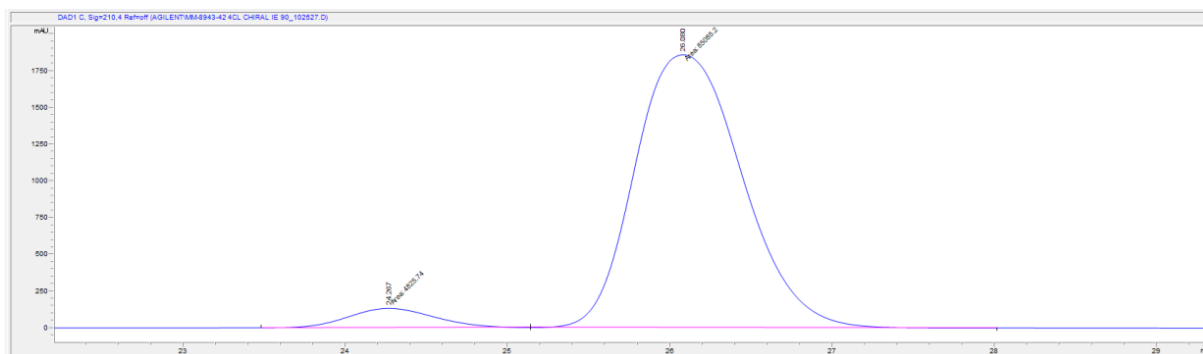

| Peak # | RetTime [min] | Type | Width [min] | Area [mAU*s] | Height [mAU] | Area %  |
|--------|---------------|------|-------------|--------------|--------------|---------|
| 1      | 24.267        | MM   | 0.6157      | 4825.74414   | 130.62802    | 5.3672  |
| 2      | 26.080        | MM   | 0.7645      | 8.50852e4    | 1854.95557   | 94.6328 |

### 3b cinchonine

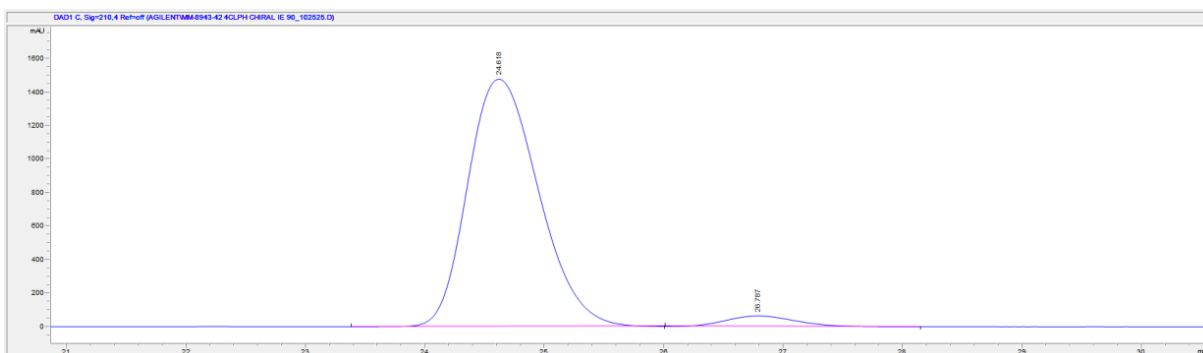

| Peak # | RetTime [min] | Type | Width [min] | Area [mAU*s] | Height [mAU] | Area %  |
|--------|---------------|------|-------------|--------------|--------------|---------|
| 1      | 24.618        | BB   | 0.6526      | 6.09378e4    | 1479.16125   | 95.8822 |
| 2      | 26.787        | BB   | 0.6312      | 2617.05151   | 63.98225     | 4.1178  |

### 3c racemic

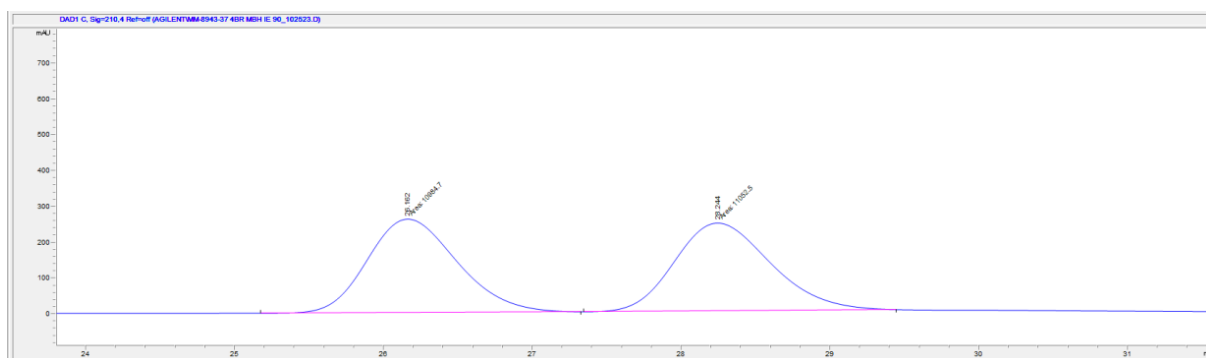

| Peak # | RetTime [min] | Type | Width [min] | Area [mAU*s] | Height [mAU] | Area %  |
|--------|---------------|------|-------------|--------------|--------------|---------|
| 1      | 26.162        | MM   | 0.7013      | 1.09847e4    | 261.06619    | 49.8461 |
| 2      | 28.244        | MM   | 0.7504      | 1.10525e4    | 245.47301    | 50.1539 |

### 3c quinine

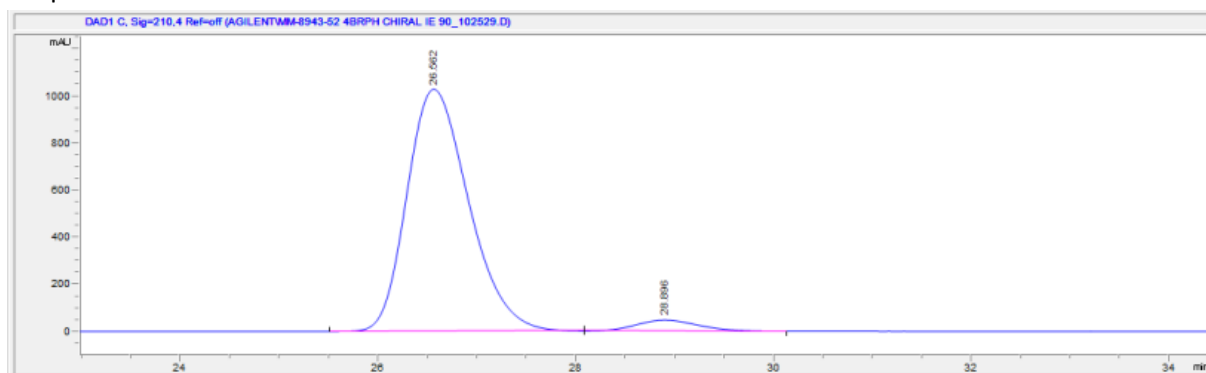

| Peak # | RetTime [min] | Type | Width [min] | Area [mAU*s] | Height [mAU] | Area %  |
|--------|---------------|------|-------------|--------------|--------------|---------|
| 1      | 26.562        | BB   | 0.6737      | 4.43787e4    | 1023.92645   | 95.6358 |
| 2      | 28.896        | BB   | 0.6665      | 2025.15247   | 46.10466     | 4.3642  |

### 3c cinchonine

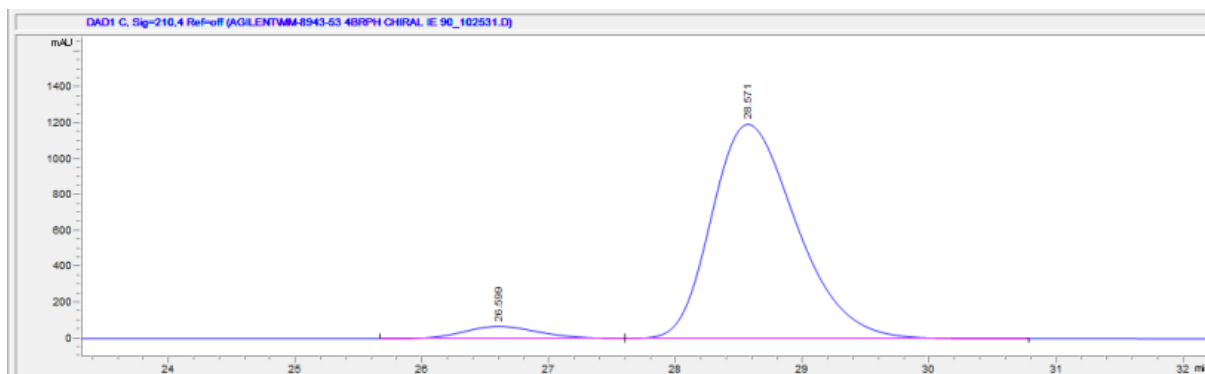

| Peak # | RetTime [min] | Type | Width [min] | Area [mAU*s] | Height [mAU] | Area %  |
|--------|---------------|------|-------------|--------------|--------------|---------|
| 1      | 26.599        | BV   | 0.6422      | 2827.30933   | 67.84736     | 4.8299  |
| 2      | 28.571        | VB   | 0.7262      | 5.57107e4    | 1194.40967   | 95.1701 |

### 3d racemic

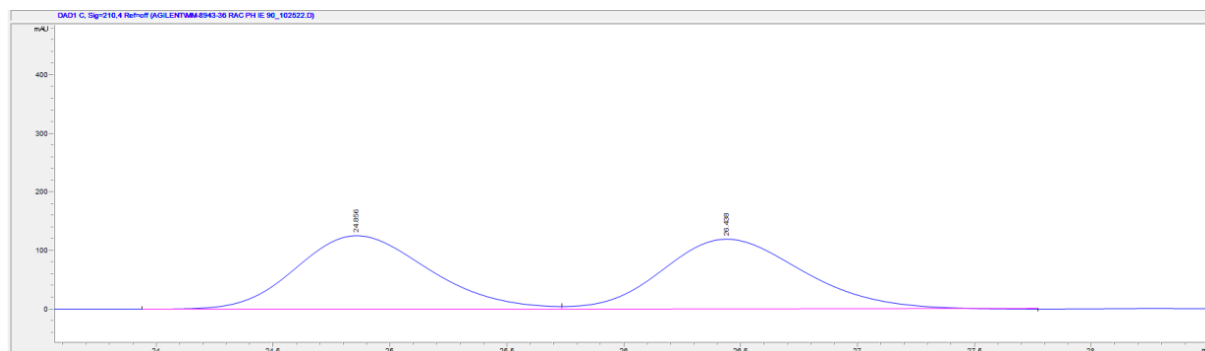

| Peak # | RetTime [min] | Type | Width [min] | Area [mAU*s] | Height [mAU] | Area %  |
|--------|---------------|------|-------------|--------------|--------------|---------|
| 1      | 24.856        | BV   | 0.6061      | 4936.85352   | 125.17850    | 49.7015 |
| 2      | 26.438        | VB   | 0.6489      | 4996.16211   | 119.21275    | 50.2985 |

### 3d quinine

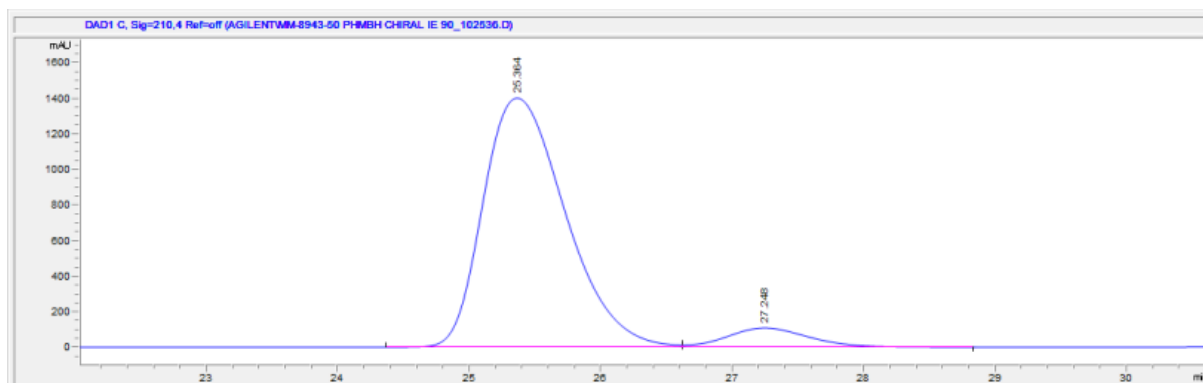

| Peak # | RetTime [min] | Type | Width [min] | Area [mAU*s] | Height [mAU] | Area %  |
|--------|---------------|------|-------------|--------------|--------------|---------|
| 1      | 25.364        | BV   | 0.6813      | 6.09879e4    | 1402.55688   | 92.9027 |
| 2      | 27.248        | VB   | 0.6645      | 4659.17188   | 107.74294    | 7.0973  |

### 3d cinchonine

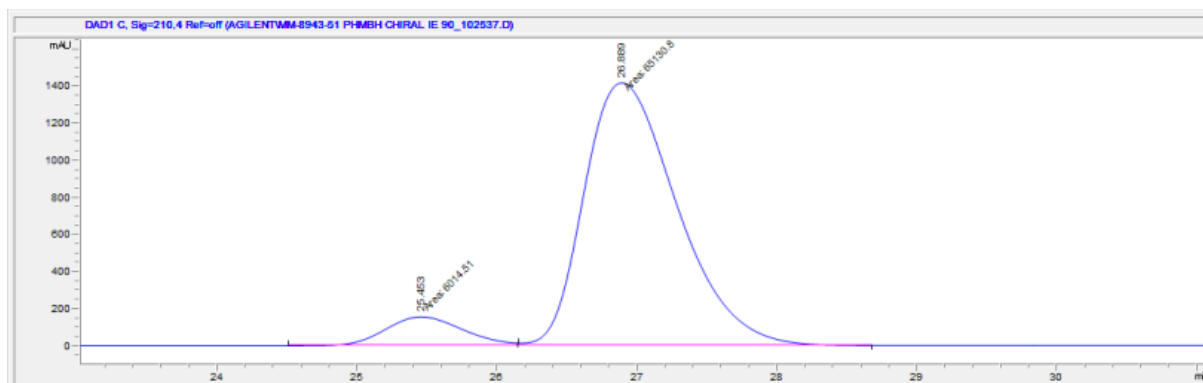

| Peak # | RetTime [min] | Type | Width [min] | Area [mAU*s] | Height [mAU] | Area %  |
|--------|---------------|------|-------------|--------------|--------------|---------|
| 1      | 25.453        | MM   | 0.6454      | 6014.50537   | 155.32388    | 8.4538  |
| 2      | 26.889        | MM   | 0.7677      | 6.51308e4    | 1414.06580   | 91.5462 |

### 3e racemic

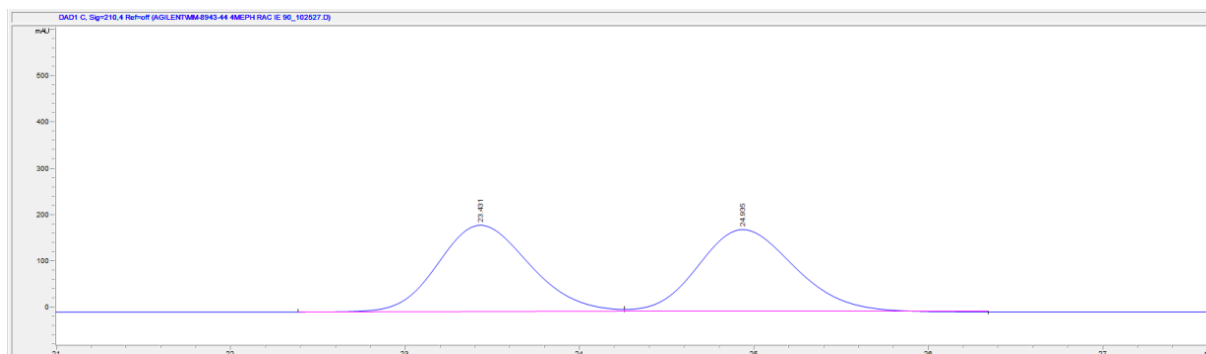

| Peak # | RetTime [min] | Type | Width [min] | Area [mAU*s] | Height [mAU] | Area %  |
|--------|---------------|------|-------------|--------------|--------------|---------|
| 1      | 23.431        | BV   | 0.5707      | 6879.28760   | 187.20409    | 49.9593 |
| 2      | 24.935        | VB   | 0.6003      | 6890.50244   | 177.75215    | 50.0407 |

### 3e quinine

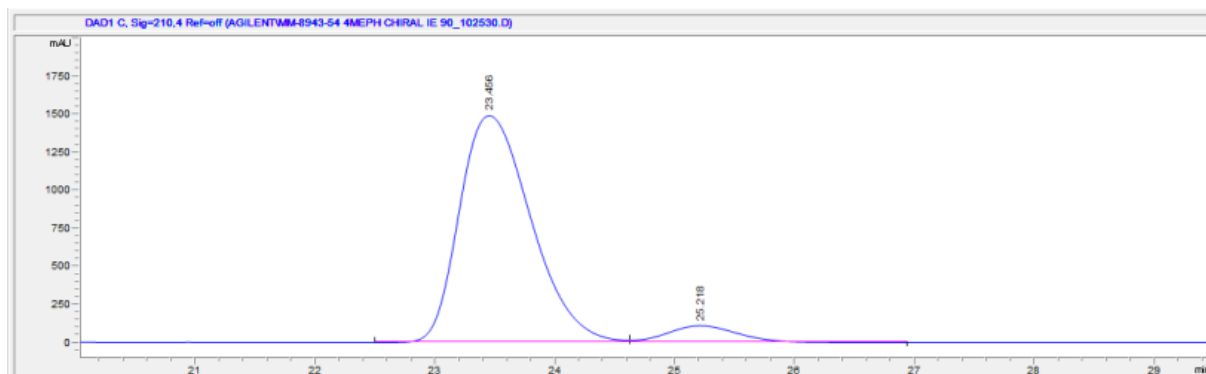

| Peak # | RetTime [min] | Type | Width [min] | Area [mAU*s] | Height [mAU] | Area %  |
|--------|---------------|------|-------------|--------------|--------------|---------|
| 1      | 23.456        | BV   | 0.6531      | 6.20796e4    | 1492.88257   | 93.1489 |
| 2      | 25.218        | VB   | 0.6369      | 4565.97168   | 110.30869    | 6.8511  |



### 3e cinchonine

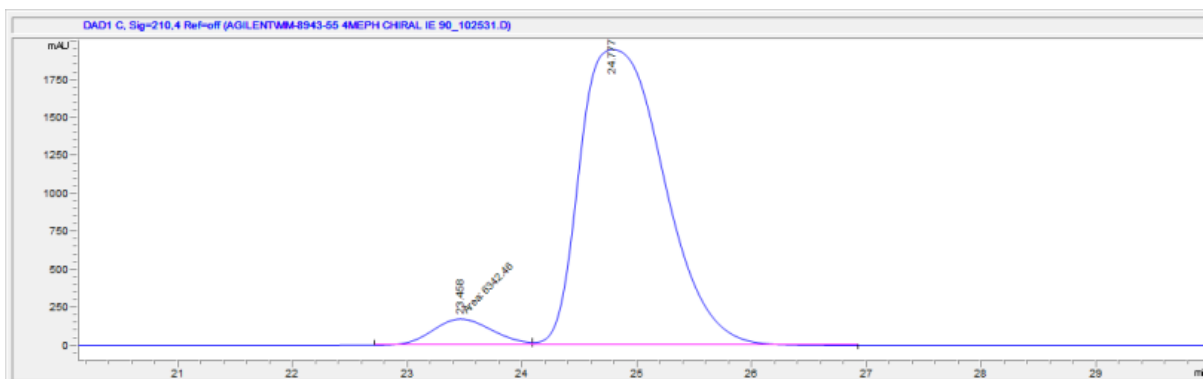

| Peak # | RetTime [min] | Type | Width [min] | Area [mAU*s] | Height [mAU] | Area %  |
|--------|---------------|------|-------------|--------------|--------------|---------|
| 1      | 23.458        | MM   | 0.6121      | 6342.46338   | 172.69540    | 6.0268  |
| 2      | 24.777        | VB   | 0.6068      | 9.88957e4    | 1946.25940   | 93.9732 |

### 3f racemic

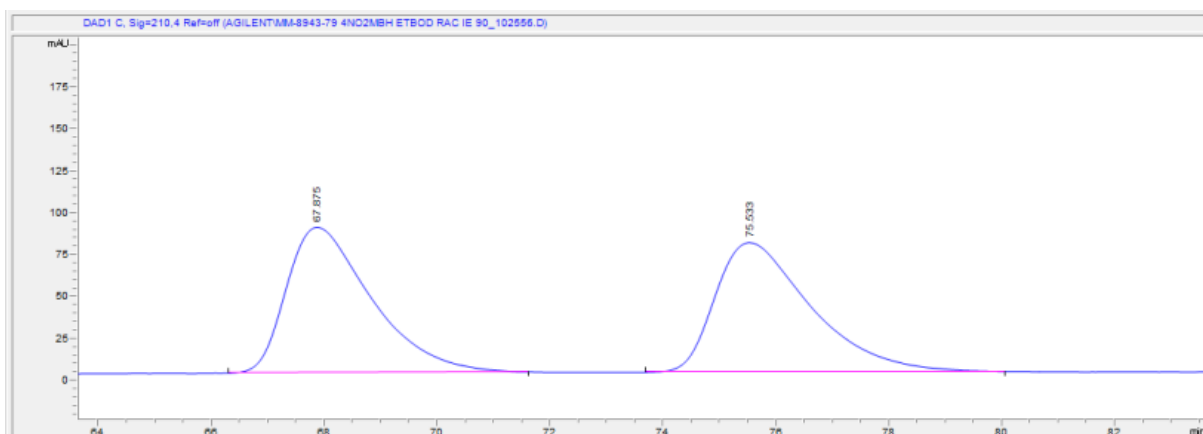

| Peak # | RetTime [min] | Type | Width [min] | Area [mAU*s] | Height [mAU] | Area %  |
|--------|---------------|------|-------------|--------------|--------------|---------|
| 1      | 67.875        | BB   | 1.2968      | 9088.78711   | 86.99923     | 49.8857 |
| 2      | 75.533        | BB   | 1.3911      | 9130.45410   | 77.46476     | 50.1143 |

### 3f quinine

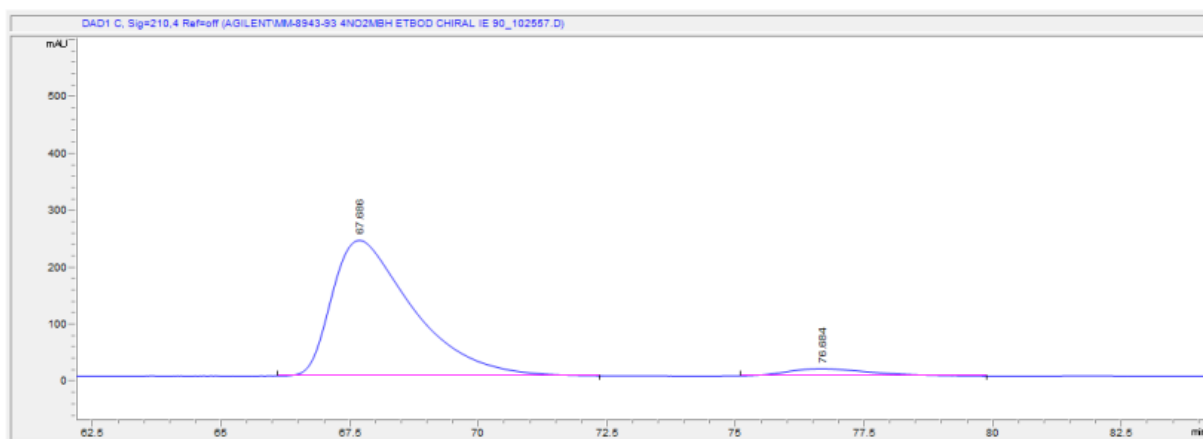

| Peak # | RetTime [min] | Type | Width [min] | Area [mAU*s] | Height [mAU] | Area %  |
|--------|---------------|------|-------------|--------------|--------------|---------|
| 1      | 67.686        | BB   | 1.5331      | 2.60653e4    | 238.85634    | 94.8079 |
| 2      | 76.684        | BB   | 1.3208      | 1427.43689   | 12.72439     | 5.1921  |

### 3f cinchonine

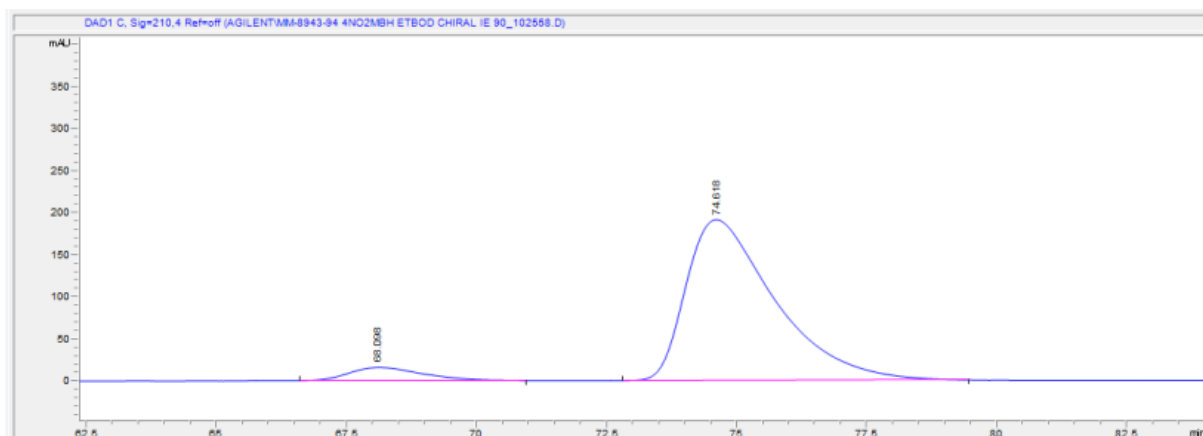

| Peak # | RetTime [min] | Type | Width [min] | Area [mAU*s] | Height [mAU] | Area %  |
|--------|---------------|------|-------------|--------------|--------------|---------|
| 1      | 68.098        | BB   | 1.1679      | 1525.76160   | 15.42610     | 6.3191  |
| 2      | 74.618        | BB   | 1.6397      | 2.26196e4    | 190.44102    | 93.6809 |

### 3g racemic

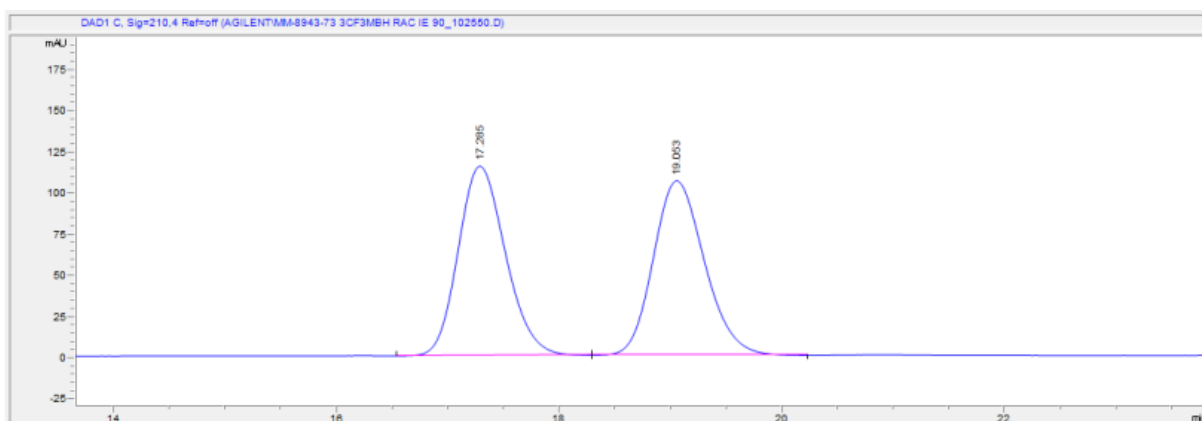

| Peak # | RetTime [min] | Type | Width [min] | Area [mAU*s] | Height [mAU] | Area %  |
|--------|---------------|------|-------------|--------------|--------------|---------|
| 1      | 17.285        | BB   | 0.4560      | 3395.69165   | 115.17260    | 50.0560 |
| 2      | 19.053        | BB   | 0.4969      | 3388.08838   | 106.01086    | 49.9440 |

### 3g cinchonine

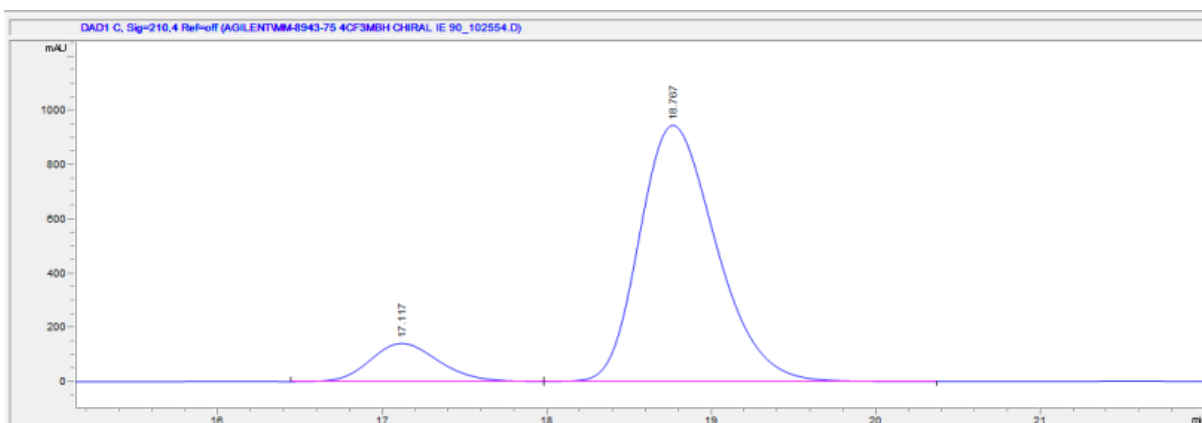

| Peak # | RetTime [min] | Type | Width [min] | Area [mAU*s] | Height [mAU] | Area %  |
|--------|---------------|------|-------------|--------------|--------------|---------|
| 1      | 17.117        | BB   | 0.4462      | 4044.51733   | 140.33115    | 11.7041 |
| 2      | 18.767        | BB   | 0.5033      | 3.05120e4    | 943.36212    | 88.2959 |

### 3g cinchonidine

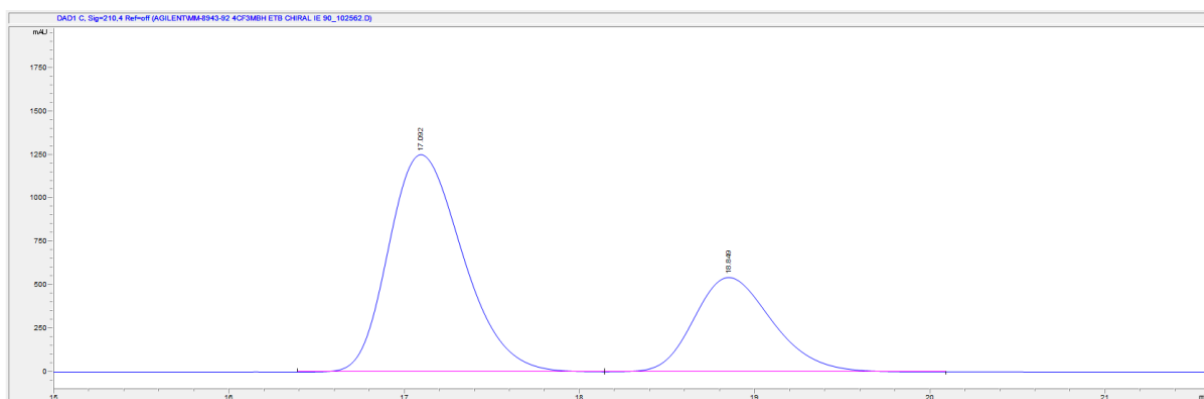

| Peak # | RetTime [min] | Type | Width [min] | Area [mAU*s] | Height [mAU] | Area %  |
|--------|---------------|------|-------------|--------------|--------------|---------|
| 1      | 17.092        | BV   | 0.4614      | 3.67415e4    | 1248.10413   | 68.4555 |
| 2      | 18.849        | VB   | 0.4841      | 1.69306e4    | 542.54004    | 31.5445 |

### 3h racemic

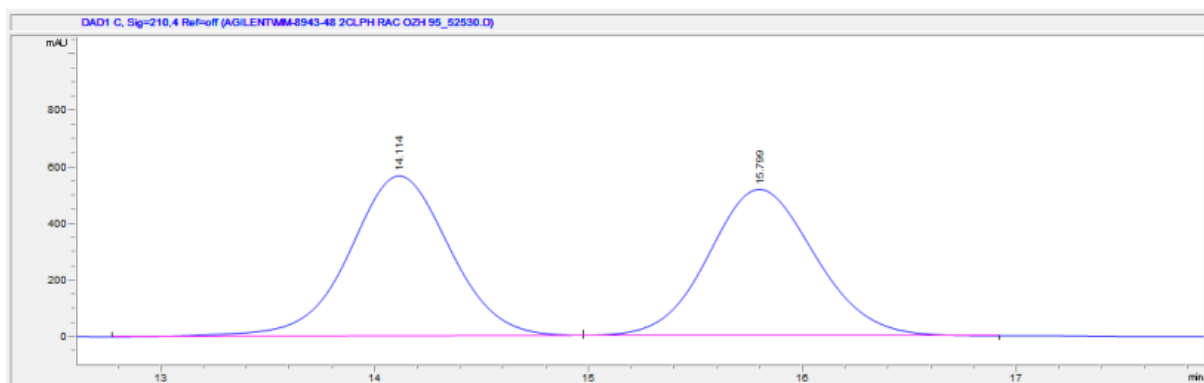

| Peak # | RetTime [min] | Type | Width [min] | Area [mAU*s] | Height [mAU] | Area %  |
|--------|---------------|------|-------------|--------------|--------------|---------|
| 1      | 14.114        | BV   | 0.5067      | 1.86873e4    | 566.66266    | 50.7698 |
| 2      | 15.799        | VB   | 0.5402      | 1.81205e4    | 517.89227    | 49.2302 |

### 3h quinine

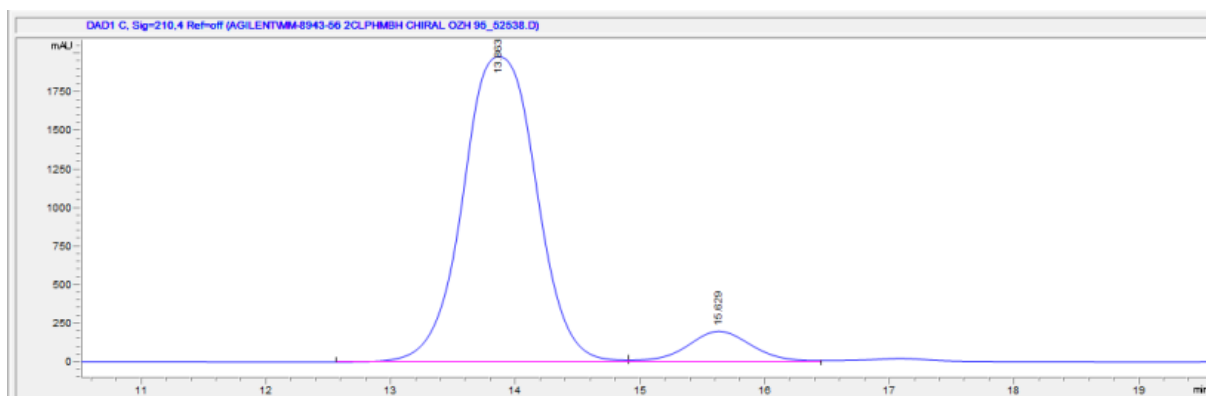

| Peak # | RetTime [min] | Type | Width [min] | Area [mAU*s] | Height [mAU] | Area %  |
|--------|---------------|------|-------------|--------------|--------------|---------|
| 1      | 13.863        | BV   | 0.6425      | 8.11509e4    | 1986.81567   | 91.8676 |
| 2      | 15.629        | VV   | 0.5547      | 7183.68799   | 198.27872    | 8.1324  |

### 3h cinchonine

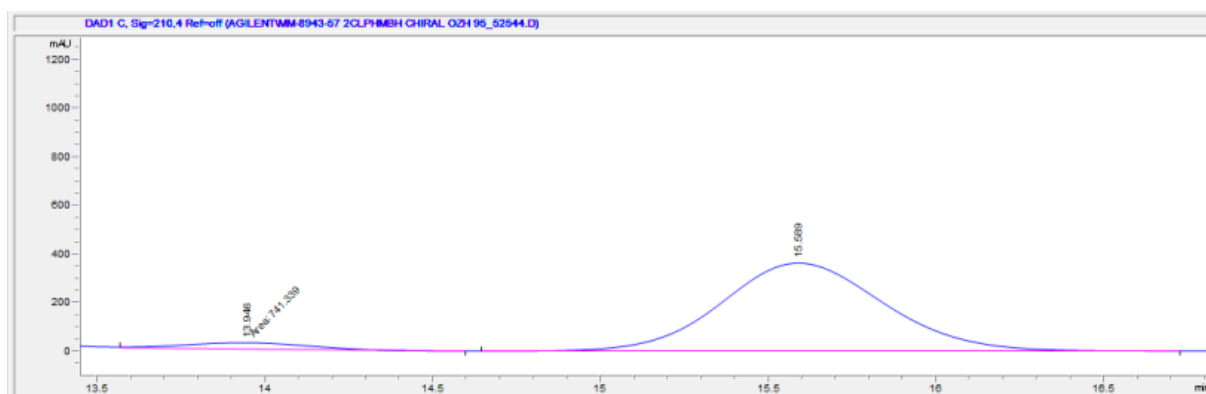

| Peak # | RetTime [min] | Type | Width [min] | Area [mAU*s] | Height [mAU] | Area %  |
|--------|---------------|------|-------------|--------------|--------------|---------|
| 1      | 13.946        | MM   | 0.4482      | 741.33929    | 27.56478     | 5.7083  |
| 2      | 15.589        | BB   | 0.5210      | 1.22458e4    | 361.73288    | 94.2917 |

### 3i racemic

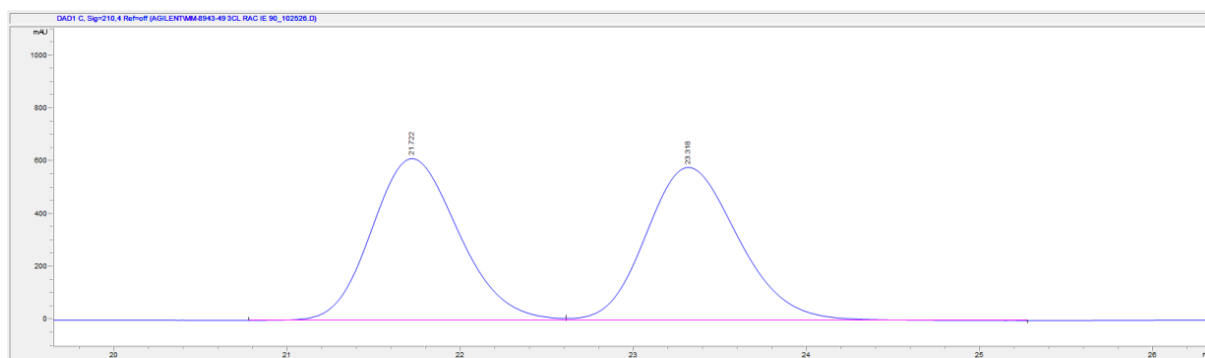

| Peak # | RetTime [min] | Type | Width [min] | Area [mAU*s] | Height [mAU] | Area %  |
|--------|---------------|------|-------------|--------------|--------------|---------|
| 1      | 21.722        | BV   | 0.5459      | 2.13964e4    | 612.02673    | 49.8883 |
| 2      | 23.318        | VB   | 0.5772      | 2.14922e4    | 578.85095    | 50.1117 |

### 3i quinine

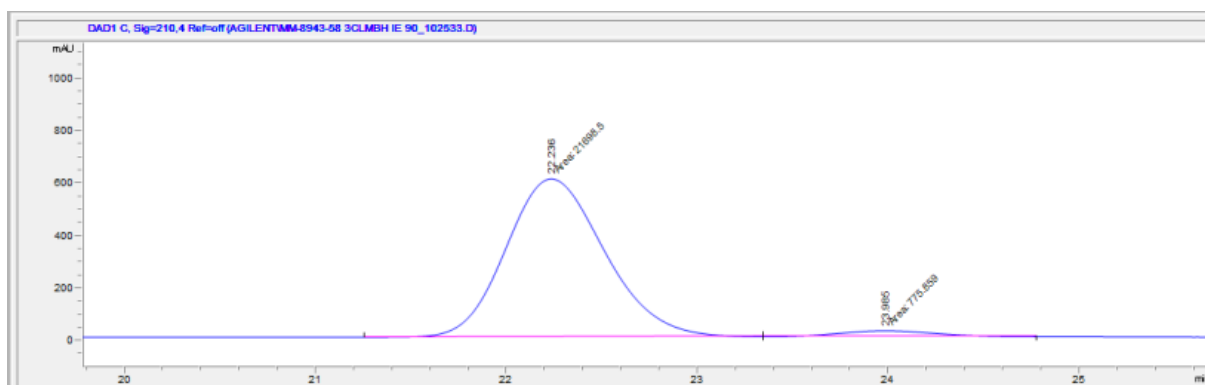

| Peak # | RetTime [min] | Type | Width [min] | Area [mAU*s] | Height [mAU] | Area %  |
|--------|---------------|------|-------------|--------------|--------------|---------|
| 1      | 22.236        | MM   | 0.5993      | 2.16985e4    | 603.39240    | 96.5478 |
| 2      | 23.985        | MM   | 0.5867      | 775.85919    | 22.03879     | 3.4522  |

### 3i cinchonine

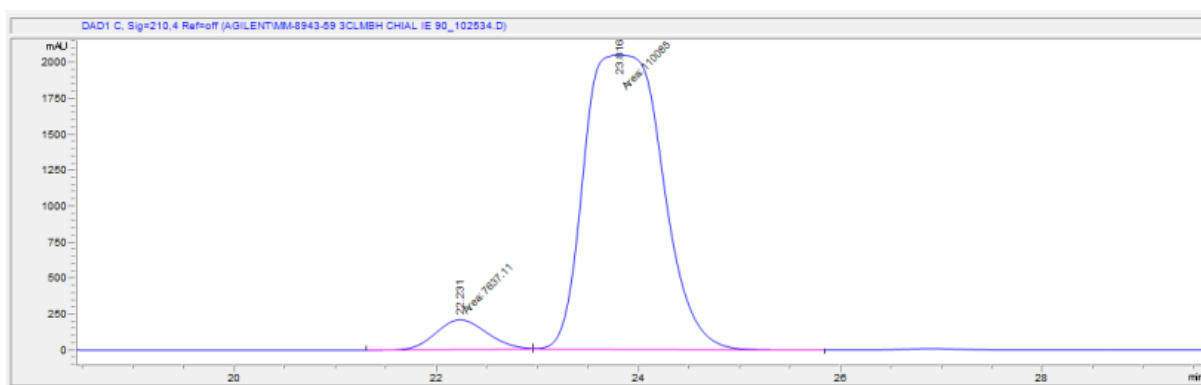

| Peak # | RetTime [min] | Type | Width [min] | Area [mAU*s] | Height [mAU] | Area %  |
|--------|---------------|------|-------------|--------------|--------------|---------|
| 1      | 22.231        | MM   | 0.6049      | 7637.11230   | 210.43970    | 6.4874  |
| 2      | 23.816        | MM   | 0.8954      | 1.10085e5    | 2049.02905   | 93.5126 |

### 3j racemic

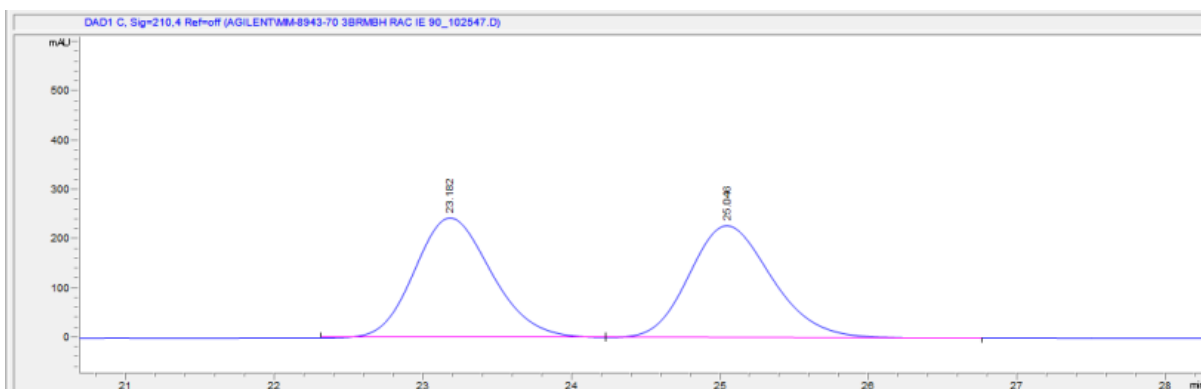

| Peak # | RetTime [min] | Type | Width [min] | Area [mAU*s] | Height [mAU] | Area %  |
|--------|---------------|------|-------------|--------------|--------------|---------|
| 1      | 23.182        | BV   | 0.5616      | 8831.56445   | 243.24799    | 49.9717 |
| 2      | 25.046        | VB   | 0.6015      | 8841.56836   | 227.45883    | 50.0283 |

### 3j quinine

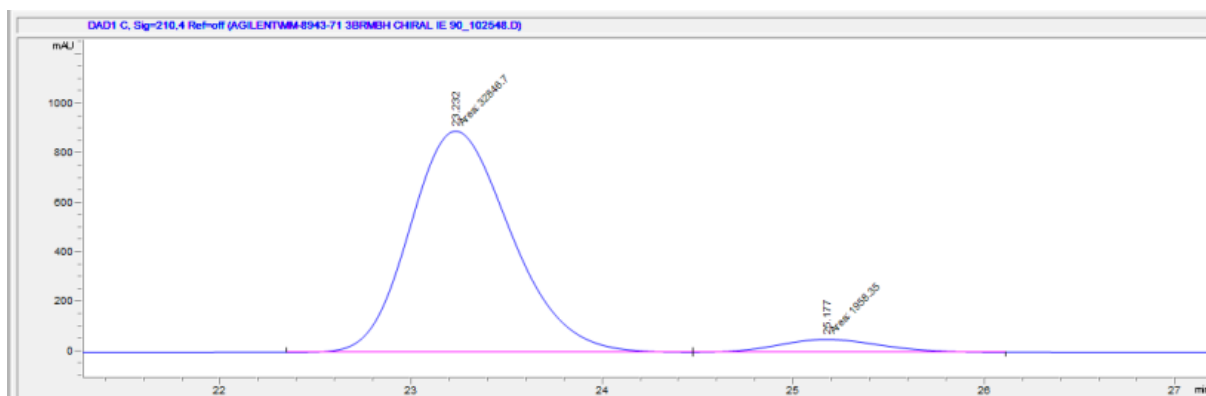

| Peak # | RetTime [min] | Type | Width [min] | Area [mAU*s] | Height [mAU] | Area %  |
|--------|---------------|------|-------------|--------------|--------------|---------|
| 1      | 23.232        | MM   | 0.6132      | 3.28467e4    | 892.81555    | 94.3734 |
| 2      | 25.177        | MM   | 0.6269      | 1958.34741   | 52.06397     | 5.6266  |

### 3j cinchonine

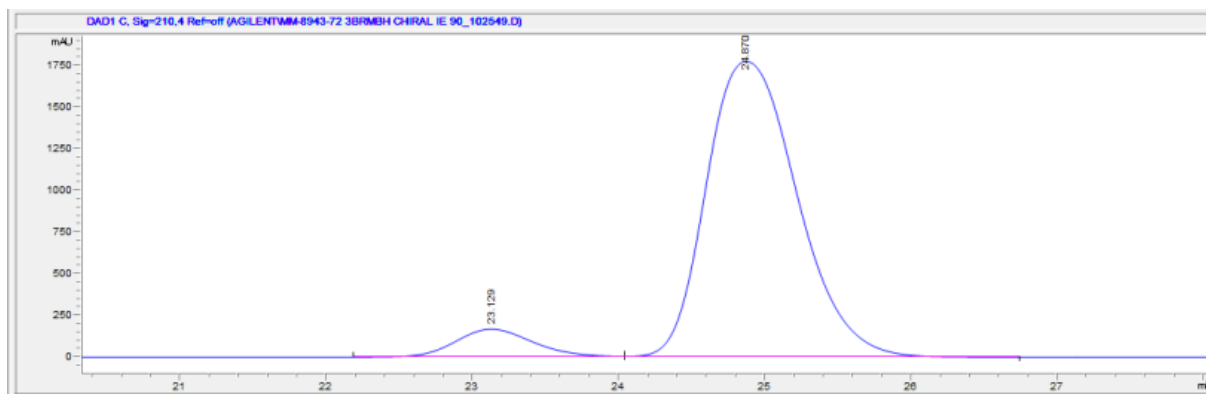

| Peak # | RetTime [min] | Type | Width [min] | Area [mAU*s] | Height [mAU] | Area %  |
|--------|---------------|------|-------------|--------------|--------------|---------|
| 1      | 23.129        | BV   | 0.5789      | 6265.60840   | 167.32080    | 7.5651  |
| 2      | 24.870        | VB   | 0.6850      | 7.65574e4    | 1775.59546   | 92.4349 |



### 3k racemic

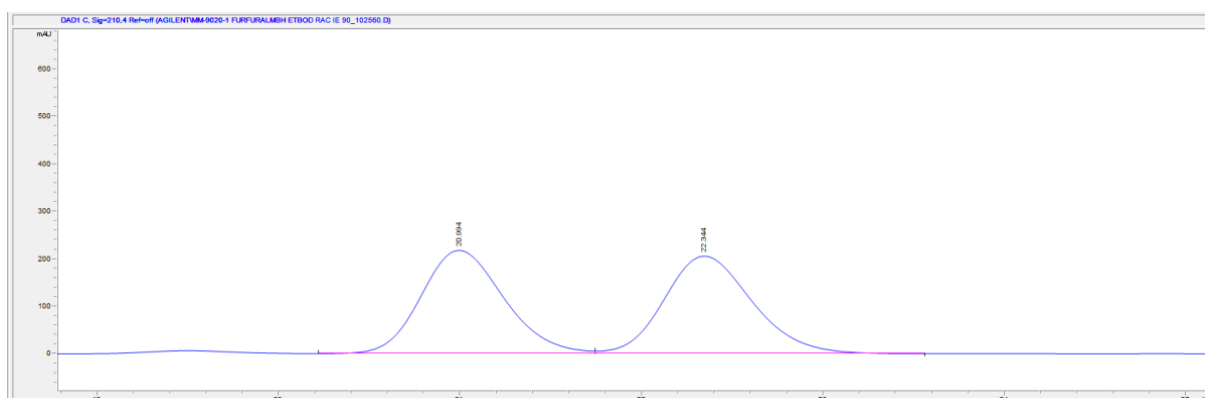

| Peak # | RetTime [min] | Type | Width [min] | Area [mAU*s] | Height [mAU] | Area %  |
|--------|---------------|------|-------------|--------------|--------------|---------|
| 1      | 20.994        | BV   | 0.4920      | 6921.49316   | 218.24988    | 49.9204 |
| 2      | 22.344        | VB   | 0.5231      | 6943.57959   | 206.07634    | 50.0796 |

### 3k quinine

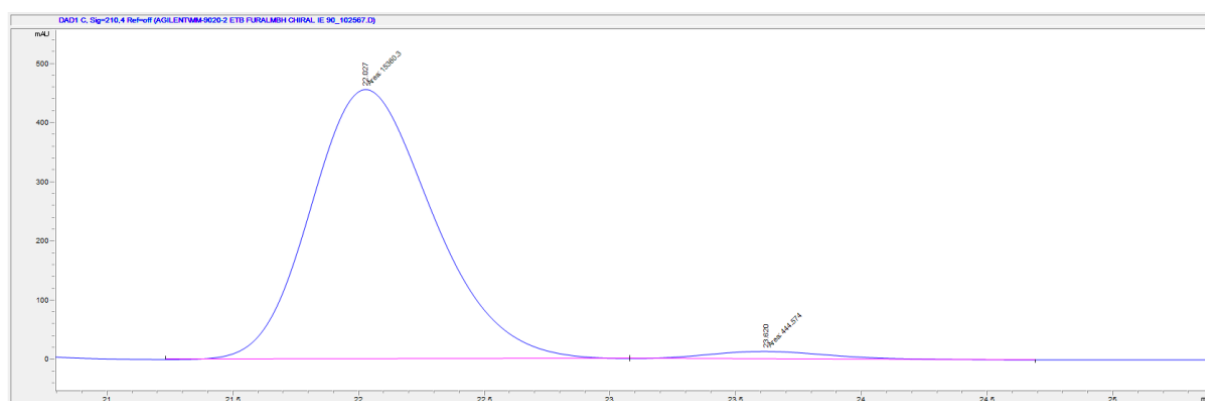

| Peak # | RetTime [min] | Type | Width [min] | Area [mAU*s] | Height [mAU] | Area %  |
|--------|---------------|------|-------------|--------------|--------------|---------|
| 1      | 22.027        | MM   | 0.5621      | 1.53603e4    | 455.41031    | 97.1871 |
| 2      | 23.620        | MM   | 0.5714      | 444.57407    | 12.96646     | 2.8129  |

### 3k cinchonine

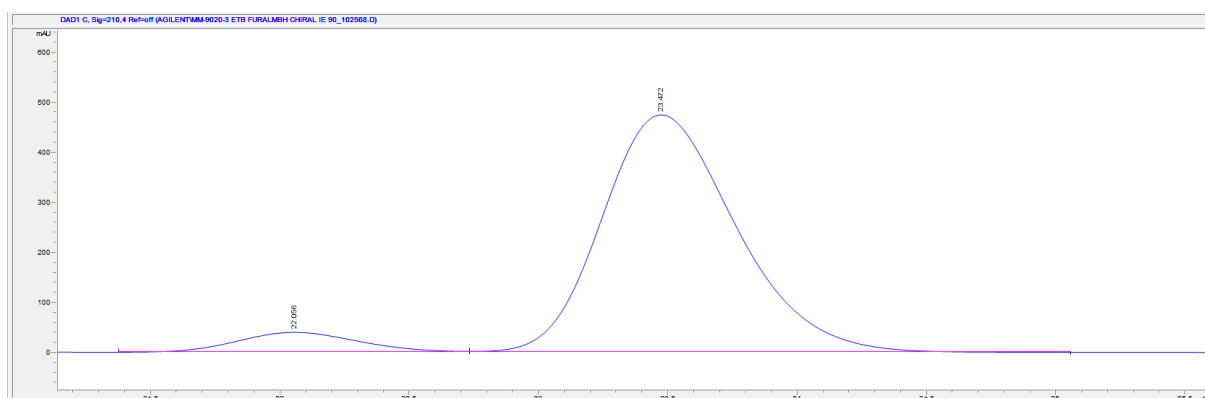

| Peak # | RetTime [min] | Type | Width [min] | Area [mAU*s] | Height [mAU] | Area %  |
|--------|---------------|------|-------------|--------------|--------------|---------|
| 1      | 22.056        | BV   | 0.5039      | 1295.22485   | 39.56888     | 7.0698  |
| 2      | 23.472        | VB   | 0.5557      | 1.70254e4    | 473.25195    | 92.9302 |

### 3l racemic

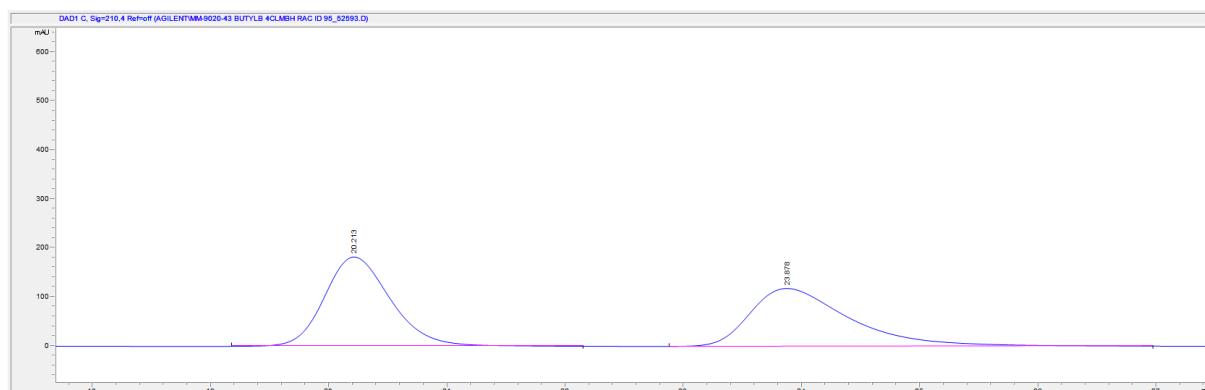

| Peak # | RetTime [min] | Type | Width [min] | Area [mAU*s] | Height [mAU] | Area %  |
|--------|---------------|------|-------------|--------------|--------------|---------|
| 1      | 20.213        | BB   | 0.5970      | 7116.46582   | 182.46945    | 50.6609 |
| 2      | 23.878        | BB   | 0.8655      | 6930.77979   | 118.29440    | 49.3391 |

### 3I quinine

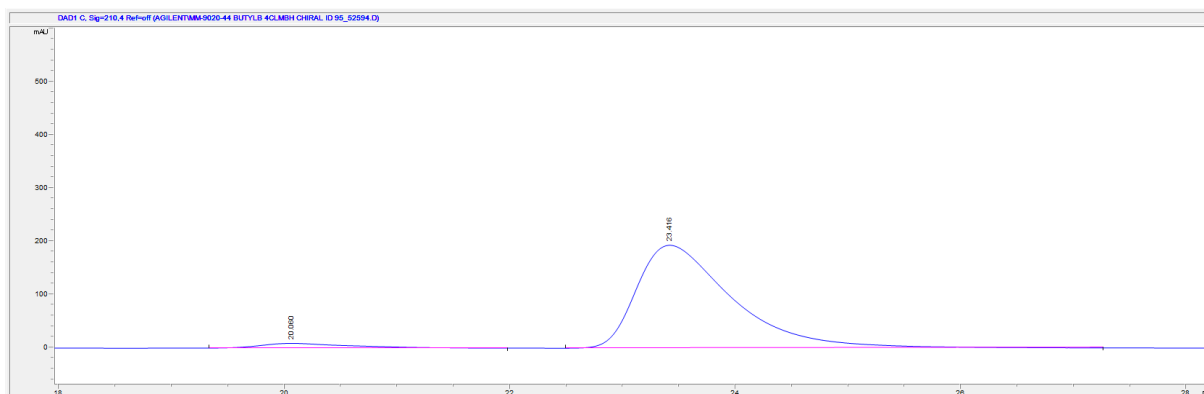

| Peak # | RetTime [min] | Type | Width [min] | Area [mAU*s] | Height [mAU] | Area %  |
|--------|---------------|------|-------------|--------------|--------------|---------|
| 1      | 20.060        | BB   | 0.6667      | 496.75235    | 8.98897      | 4.1589  |
| 2      | 23.416        | BB   | 0.8702      | 1.14475e4    | 194.05899    | 95.8411 |

### 3I cinchonine

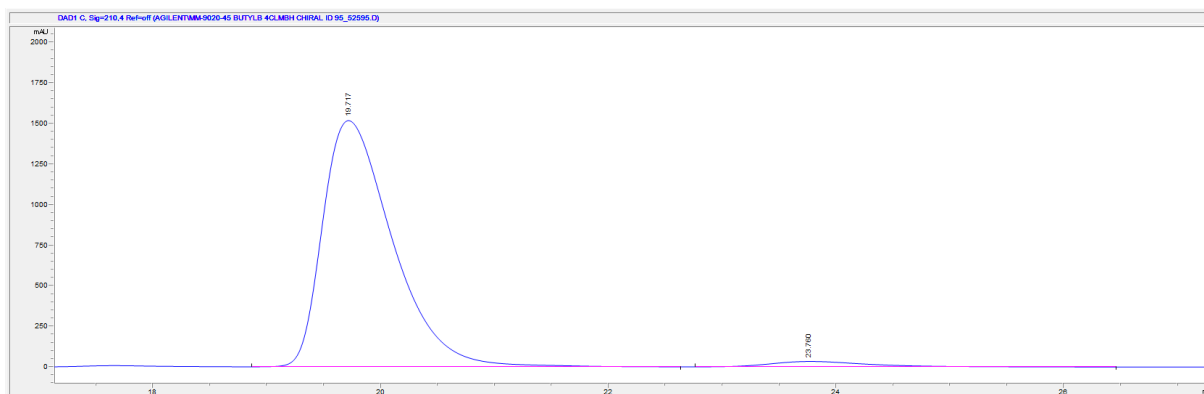

| Peak # | RetTime [min] | Type | Width [min] | Area [mAU*s] | Height [mAU] | Area %  |
|--------|---------------|------|-------------|--------------|--------------|---------|
| 1      | 19.717        | BB   | 0.6562      | 6.46285e4    | 1519.69202   | 96.9816 |
| 2      | 23.760        | BB   | 0.8430      | 2011.48218   | 33.38048     | 3.0184  |

### 3m racemic

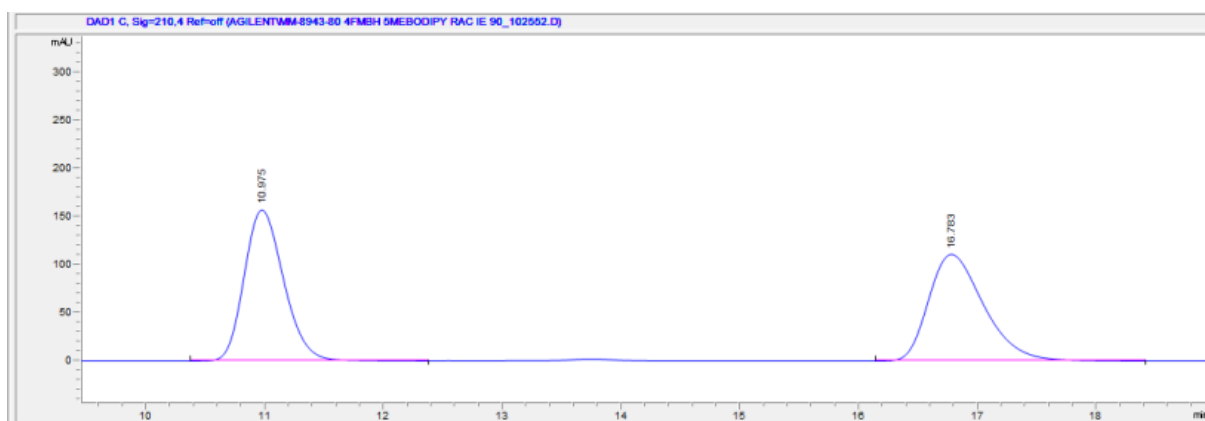

| Peak # | RetTime [min] | Type | Width [min] | Area [mAU*s] | Height [mAU] | Area %  |
|--------|---------------|------|-------------|--------------|--------------|---------|
| 1      | 10.975        | BB   | 0.3601      | 3652.19556   | 157.73555    | 50.2874 |
| 2      | 16.783        | BB   | 0.5001      | 3610.45288   | 111.40118    | 49.7126 |

### 3m cinchonine

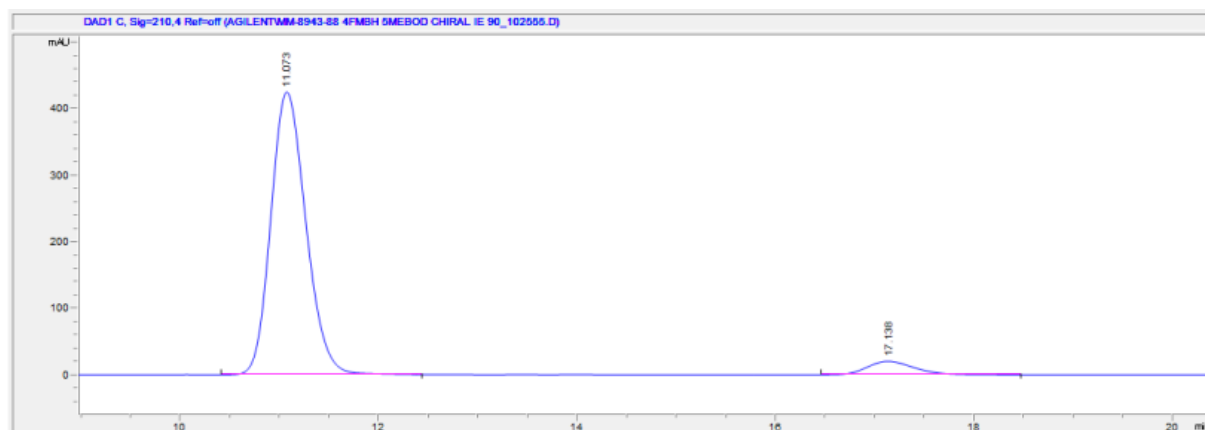

| Peak # | RetTime [min] | Type | Width [min] | Area [mAU*s] | Height [mAU] | Area %  |
|--------|---------------|------|-------------|--------------|--------------|---------|
| 1      | 11.073        | BB   | 0.3823      | 1.04135e4    | 424.32004    | 93.9802 |
| 2      | 17.138        | BB   | 0.5024      | 667.02216    | 20.03463     | 6.0198  |

### 3m cinchonidine

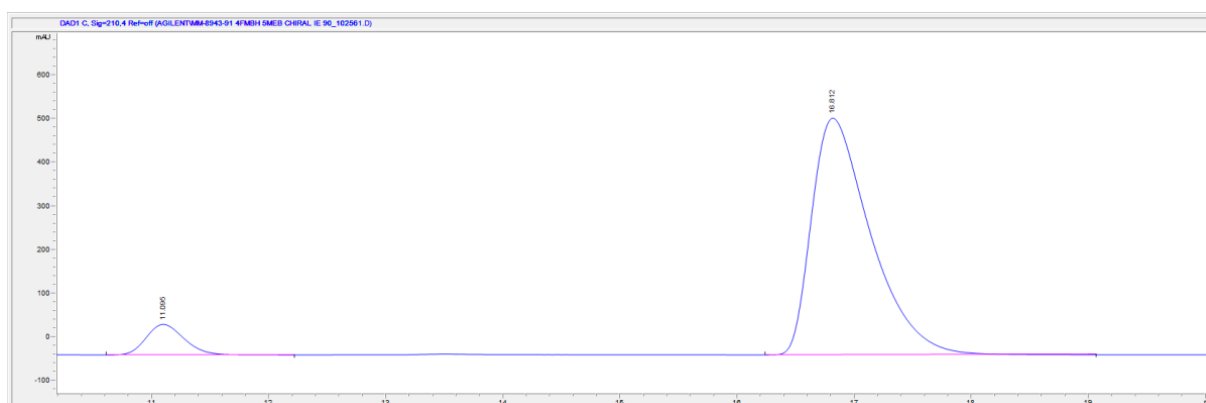

| Peak # | RetTime [min] | Type | Width [min] | Area [mAU*s] | Height [mAU] | Area %  |
|--------|---------------|------|-------------|--------------|--------------|---------|
| 1      | 11.095        | BB   | 0.3518      | 1582.48059   | 69.99358     | 7.6732  |
| 2      | 16.812        | BB   | 0.5326      | 1.90410e4    | 543.66583    | 92.3268 |

### 3n racemic

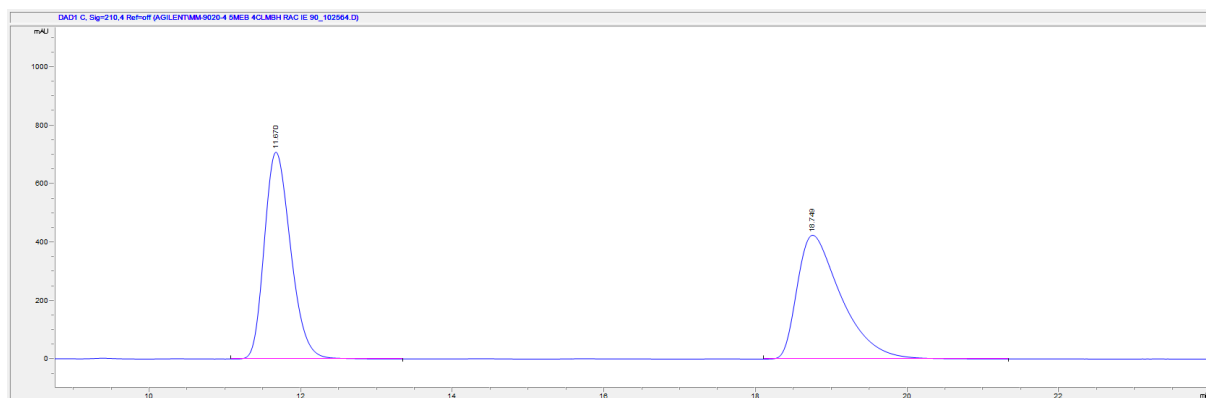

| Peak # | RetTime [min] | Type | Width [min] | Area [mAU*s] | Height [mAU] | Area %  |
|--------|---------------|------|-------------|--------------|--------------|---------|
| 1      | 11.670        | BB   | 0.3755      | 1.70526e4    | 706.85925    | 49.9732 |
| 2      | 18.749        | BB   | 0.6026      | 1.70708e4    | 423.21832    | 50.0268 |

### 3n cinchonine

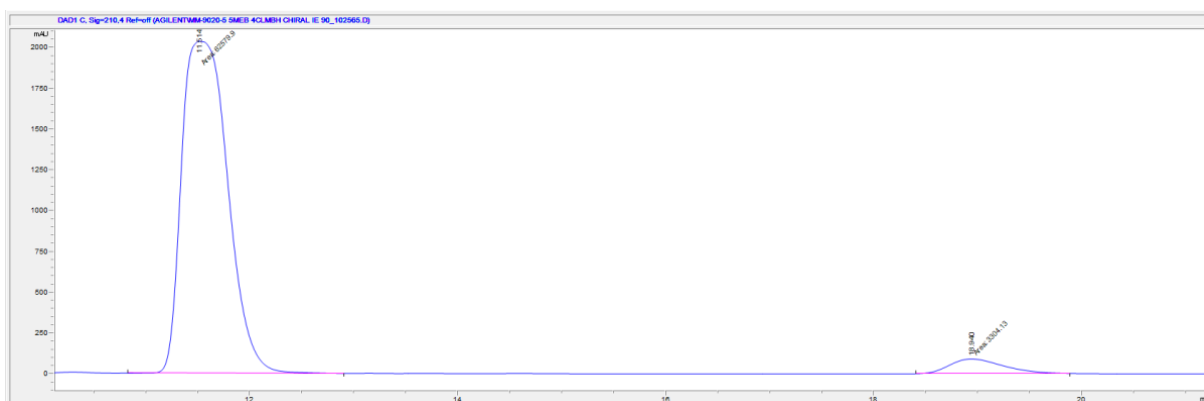

| Peak # | RetTime [min] | Type | Width [min] | Area [mAU*s] | Height [mAU] | Area %  |
|--------|---------------|------|-------------|--------------|--------------|---------|
| 1      | 11.514        | MM   | 0.5123      | 6.25799e4    | 2035.77698   | 94.9849 |
| 2      | 18.940        | MM   | 0.6057      | 3304.12622   | 90.91669     | 5.0151  |

### 3n cinchonidine

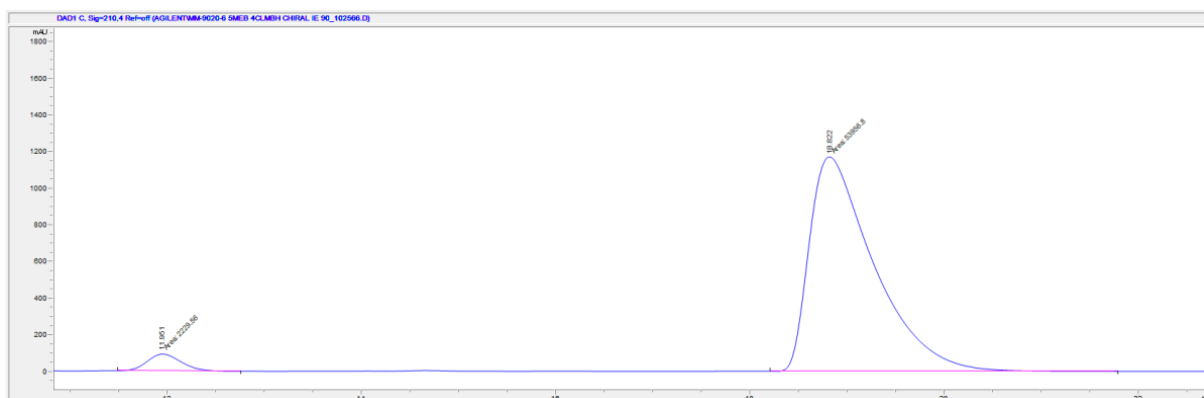

| Peak # | RetTime [min] | Type | Width [min] | Area [mAU*s] | Height [mAU] | Area %  |
|--------|---------------|------|-------------|--------------|--------------|---------|
| 1      | 11.951        | MM   | 0.4062      | 2229.55688   | 91.47264     | 3.9681  |
| 2      | 18.822        | MM   | 0.7690      | 5.39568e4    | 1169.36951   | 96.0319 |

### 3o racemic

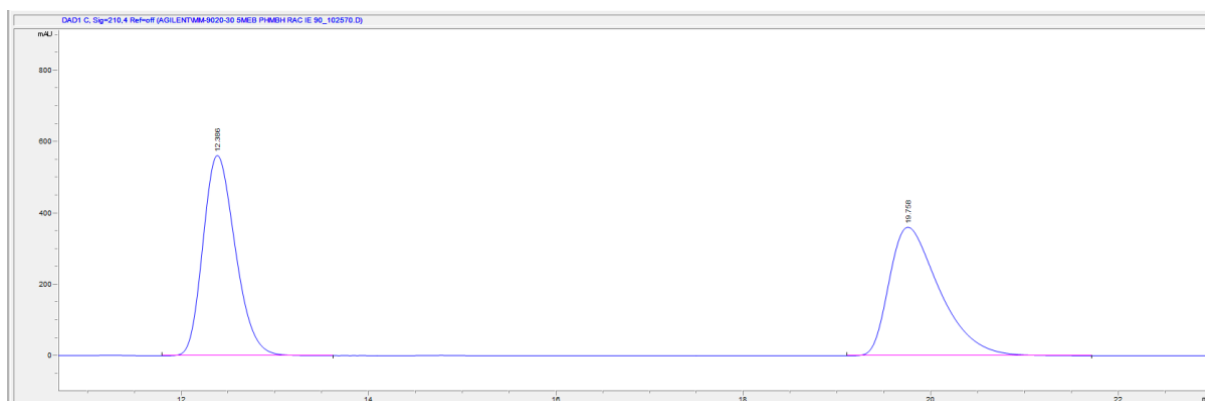

| Peak # | RetTime [min] | Type | Width [min] | Area [mAU*s] | Height [mAU] | Area %  |
|--------|---------------|------|-------------|--------------|--------------|---------|
| 1      | 12.386        | BB   | 0.3732      | 1.34291e4    | 561.16174    | 49.9785 |
| 2      | 19.758        | BB   | 0.5674      | 1.34406e4    | 360.15982    | 50.0215 |

### 3o cinchonine

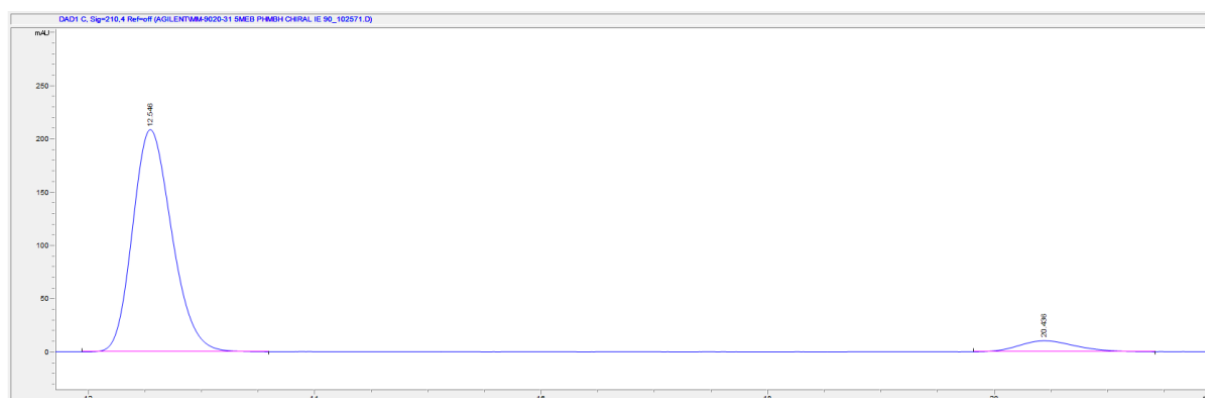

| Peak # | RetTime [min] | Type | Width [min] | Area [mAU*s] | Height [mAU] | Area %  |
|--------|---------------|------|-------------|--------------|--------------|---------|
| 1      | 12.546        | BB   | 0.3739      | 4992.85742   | 208.11278    | 93.2590 |
| 2      | 20.436        | BB   | 0.4870      | 360.89615    | 10.29441     | 6.7410  |

### 3o cinchonidine

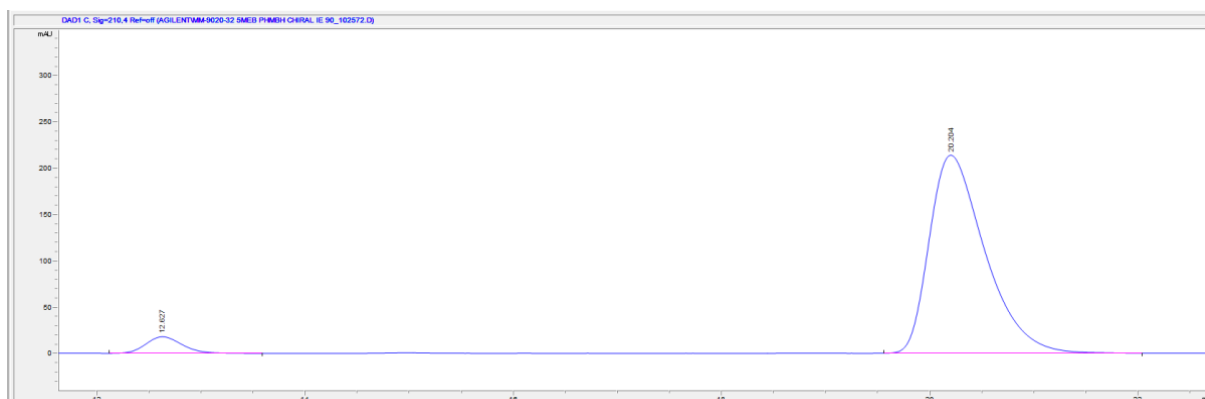

| Peak # | RetTime [min] | Type | Width [min] | Area [mAU*s] | Height [mAU] | Area %  |
|--------|---------------|------|-------------|--------------|--------------|---------|
| 1      | 12.627        | BB   | 0.3727      | 432.08942    | 17.83053     | 5.1797  |
| 2      | 20.204        | BB   | 0.5626      | 7909.87305   | 213.33762    | 94.8203 |

### 3p racemic

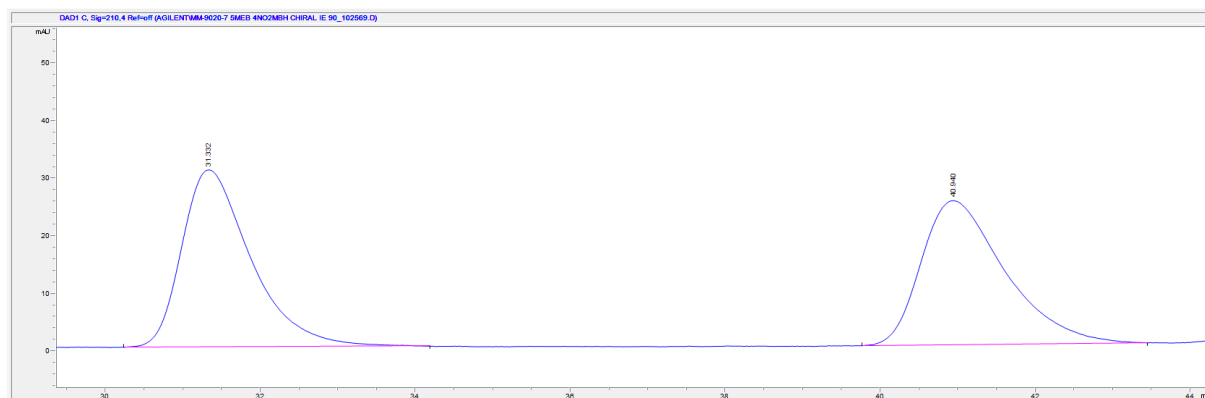

| Peak # | RetTime [min] | Type | Width [min] | Area [mAU*s] | Height [mAU] | Area %  |
|--------|---------------|------|-------------|--------------|--------------|---------|
| 1      | 31.332        | BB   | 0.9037      | 1904.46606   | 30.70138     | 50.3587 |
| 2      | 40.940        | BB   | 0.9542      | 1877.33350   | 24.99619     | 49.6413 |



### 3p cinchonine

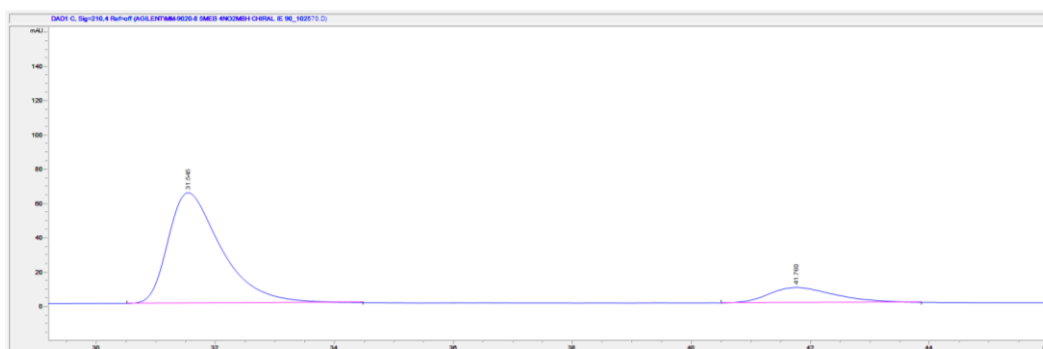

| Peak # | RetTime [min] | Type | Width [min] | Area [mAU*s] | Height [mAU] | Area %  |
|--------|---------------|------|-------------|--------------|--------------|---------|
| 1      | 31.545        | BB   | 0.9013      | 4011.50635   | 64.52317     | 85.4477 |
| 2      | 41.760        | BB   | 0.9143      | 683.18774    | 8.83391      | 14.5523 |

### 3p cinchonidine

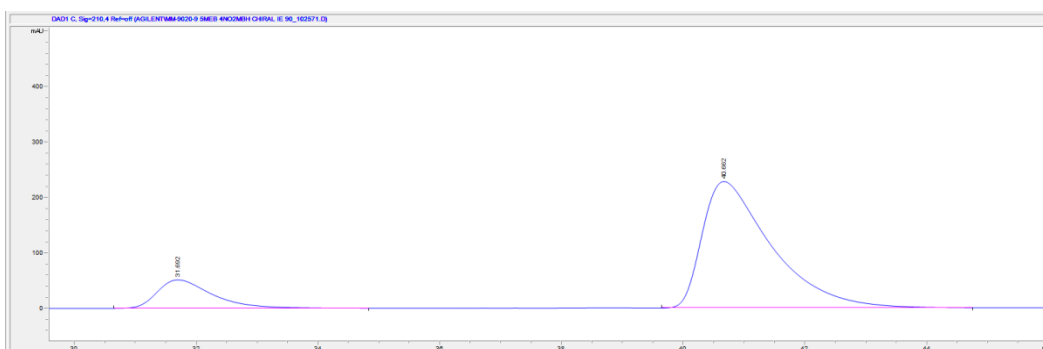

| Peak # | RetTime [min] | Type | Width [min] | Area [mAU*s] | Height [mAU] | Area %  |
|--------|---------------|------|-------------|--------------|--------------|---------|
| 1      | 31.692        | BB   | 0.8888      | 3216.29956   | 51.34625     | 15.1554 |
| 2      | 40.662        | BB   | 1.1209      | 1.80059e4    | 228.11966    | 84.8446 |

### 3q racemic

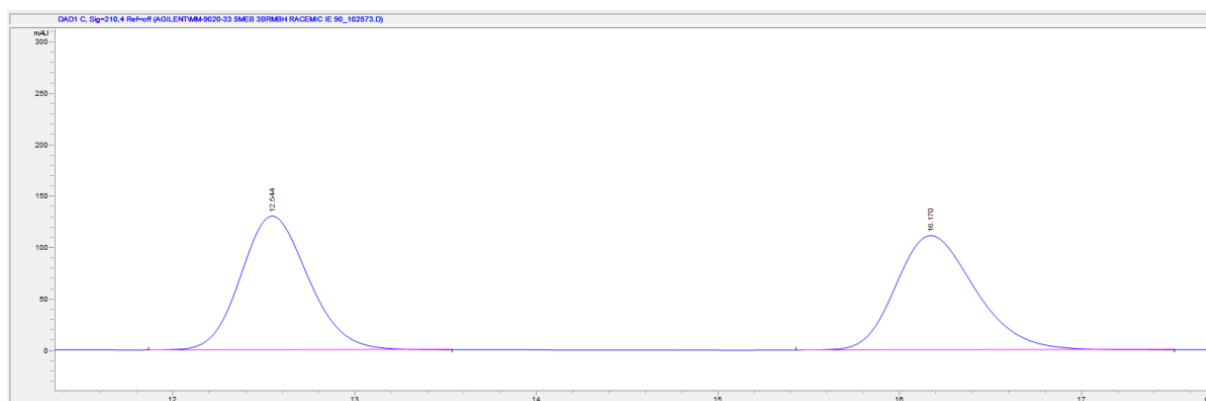

| Peak # | RetTime [min] | Type | Width [min] | Area [mAU*s] | Height [mAU] | Area %  |
|--------|---------------|------|-------------|--------------|--------------|---------|
| 1      | 12.544        | BB   | 0.4043      | 3367.25659   | 129.96225    | 49.9195 |
| 2      | 16.170        | BB   | 0.4709      | 3378.11792   | 111.04742    | 50.0805 |

### 3q cinchonine

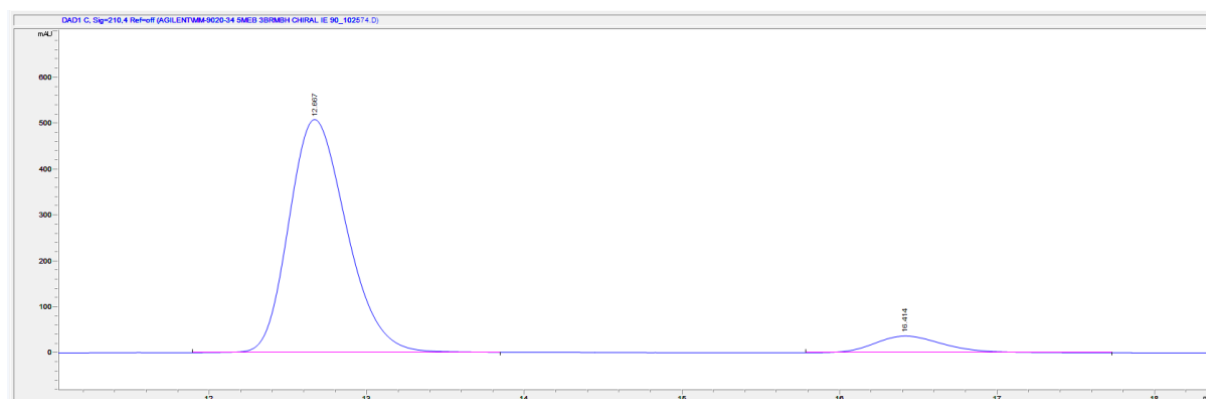

| Peak # | RetTime [min] | Type | Width [min] | Area [mAU*s] | Height [mAU] | Area %  |
|--------|---------------|------|-------------|--------------|--------------|---------|
| 1      | 12.667        | BB   | 0.3959      | 1.28446e4    | 506.36914    | 92.0877 |
| 2      | 16.414        | BB   | 0.4665      | 1103.62000   | 36.12130     | 7.9123  |

### 3q cinchonidine

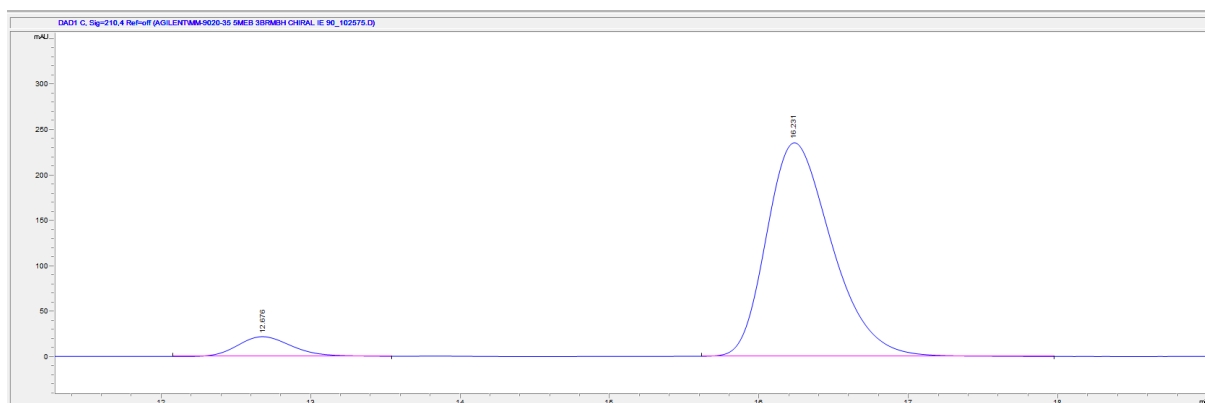

| Peak # | RetTime [min] | Type | Width [min] | Area [mAU*s] | Height [mAU] | Area %  |
|--------|---------------|------|-------------|--------------|--------------|---------|
| 1      | 12.676        | BB   | 0.3850      | 550.74200    | 21.77747     | 7.1688  |
| 2      | 16.231        | BB   | 0.4670      | 7131.70605   | 235.67038    | 92.8312 |

### 3r racemic

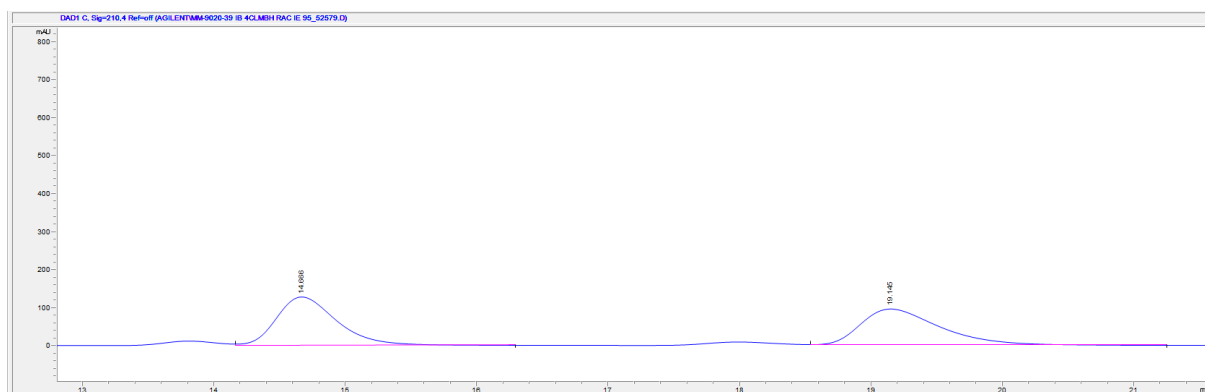

| Peak # | RetTime [min] | Type | Width [min] | Area [mAU*s] | Height [mAU] | Area %  |
|--------|---------------|------|-------------|--------------|--------------|---------|
| 1      | 14.666        | VB   | 0.4867      | 4073.21338   | 127.51538    | 50.0327 |
| 2      | 19.145        | VB   | 0.6303      | 4067.88428   | 95.62227     | 49.9673 |

### 3r cinchonine

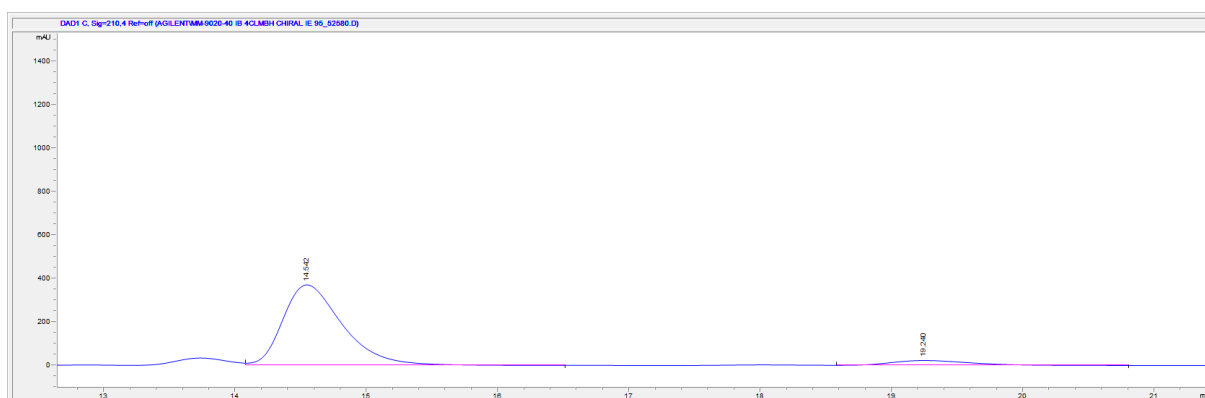

| Peak # | RetTime [min] | Type | Width [min] | Area [mAU*s] | Height [mAU] | Area %  |
|--------|---------------|------|-------------|--------------|--------------|---------|
| 1      | 14.542        | VB   | 0.4824      | 1.17115e4    | 370.86243    | 92.5860 |
| 2      | 19.240        | BB   | 0.6064      | 937.82837    | 22.40251     | 7.4140  |

### 3r cinchonidine

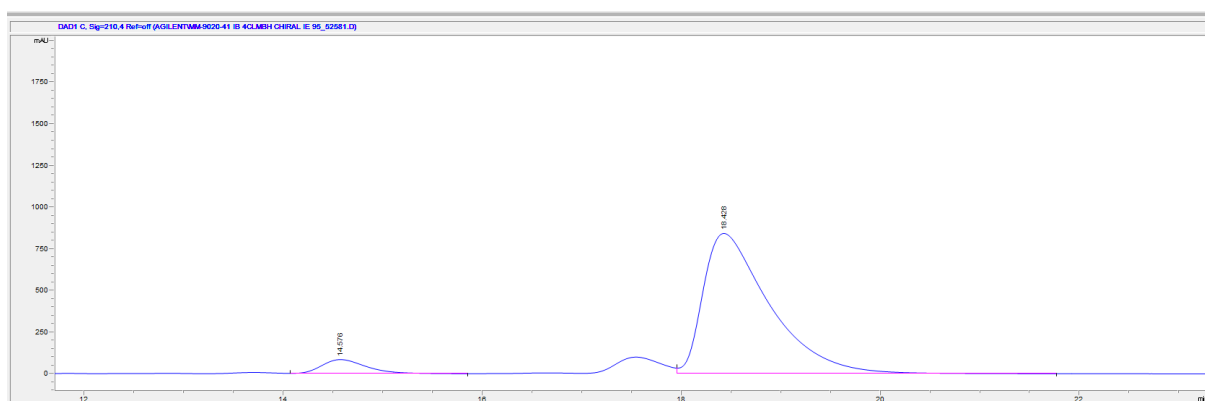

| Peak # | RetTime [min] | Type | Width [min] | Area [mAU*s] | Height [mAU] | Area %  |
|--------|---------------|------|-------------|--------------|--------------|---------|
| 1      | 14.576        | VB   | 0.4762      | 2663.45483   | 84.86239     | 6.3819  |
| 2      | 18.428        | VB   | 0.6849      | 3.90709e4    | 842.71863    | 93.6181 |

## Crystal of racemic 3d

**Table S2 Crystal data and structure refinement for 2019-mm04.**

|                                             |                                                                               |
|---------------------------------------------|-------------------------------------------------------------------------------|
| Identification code                         | 2019-mm04                                                                     |
| Empirical formula                           | C <sub>22</sub> H <sub>21</sub> BF <sub>2</sub> N <sub>2</sub> O <sub>2</sub> |
| Formula weight                              | 394.22                                                                        |
| Temperature/K                               | 100(2)                                                                        |
| Crystal system                              | orthorhombic                                                                  |
| Space group                                 | Pca2 <sub>1</sub>                                                             |
| a/Å                                         | 12.6493(2)                                                                    |
| b/Å                                         | 9.2440(2)                                                                     |
| c/Å                                         | 18.0005(3)                                                                    |
| α/°                                         | 90                                                                            |
| β/°                                         | 90                                                                            |
| γ/°                                         | 90                                                                            |
| Volume/Å <sup>3</sup>                       | 2104.80(7)                                                                    |
| Z                                           | 4                                                                             |
| ρ <sub>calc</sub> /cm <sup>3</sup>          | 1.244                                                                         |
| μ/mm <sup>-1</sup>                          | 0.091                                                                         |
| F(000)                                      | 824.0                                                                         |
| Radiation                                   | MoKα (λ = 0.71073)                                                            |
| 2θ range for data collection/°              | 6.318 to 61.47                                                                |
| Index ranges                                | -17 ≤ h ≤ 18, -13 ≤ k ≤ 11, -25 ≤ l ≤ 25                                      |
| Reflections collected                       | 28599                                                                         |
| Independent reflections                     | 6184 [R <sub>int</sub> = 0.0266, R <sub>sigma</sub> = 0.0208]                 |
| Data/restraints/parameters                  | 6184/1/272                                                                    |
| Goodness-of-fit on F <sup>2</sup>           | 1.090                                                                         |
| Final R indexes [ I  ≥ 2σ (I)]              | R <sub>1</sub> = 0.0612, wR <sub>2</sub> = 0.1535                             |
| Final R indexes [all data]                  | R <sub>1</sub> = 0.0724, wR <sub>2</sub> = 0.1622                             |
| Largest diff. peak/hole / e Å <sup>-3</sup> | 0.33/-0.17                                                                    |
| Flack parameter                             | 0.1(2)                                                                        |

**Table S3 Fractional Atomic Coordinates (×10<sup>4</sup>) and Equivalent Isotropic Displacement Parameters (Å<sup>2</sup>×10<sup>3</sup>) for 2019-mm04. U<sub>eq</sub> is defined as 1/3 of the trace of the orthogonalised U<sub>ij</sub> tensor.**

| Atom | x          | y        | z          | U(eq)    |
|------|------------|----------|------------|----------|
| O2   | 8205.9(16) | 4162(3)  | 6238.4(13) | 70.5(6)  |
| F1   | 5489(2)    | 8940(4)  | 2500.3(15) | 111.4(9) |
| O1   | 7264.3(16) | 3224(2)  | 7155.0(11) | 64.2(5)  |
| F2   | 6244(2)    | 10046(3) | 3489.0(19) | 110.9(9) |
| C15  | 7367(2)    | 3939(3)  | 6520.1(14) | 45.6(5)  |
| C10  | 5560(2)    | 5227(3)  | 4943.3(14) | 48.2(5)  |
| C9   | 5645(2)    | 6380(3)  | 4345.6(13) | 46.4(5)  |
| N1   | 4830(2)    | 8421(3)  | 3727.3(15) | 63.5(6)  |
| C8   | 6517(2)    | 6454(3)  | 3859.7(15) | 54.5(6)  |
| N2   | 6560(2)    | 7519(3)  | 3313.5(13) | 63.0(6)  |
| C12  | 6474.5(19) | 5369(3)  | 5515.3(13) | 44.5(5)  |

|      |         |         |            |           |
|------|---------|---------|------------|-----------|
| C4   | 4815(2) | 7349(3) | 4273.9(14) | 50.0(5)   |
| C13  | 6338(2) | 4381(3) | 6187.0(13) | 48.5(5)   |
| C11  | 5482(3) | 3709(3) | 4610.3(19) | 64.3(7)   |
| C7   | 7426(3) | 5594(4) | 3772.7(19) | 68.7(8)   |
| C3   | 3844(2) | 7482(4) | 4659.2(19) | 62.9(7)   |
| C16  | 6611(2) | 6933(3) | 5782.7(14) | 49.8(5)   |
| C1   | 3924(3) | 9151(4) | 3776(3)    | 85.4(11)  |
| C5   | 7451(3) | 7304(5) | 2918(2)    | 82.1(11)  |
| C2   | 3294(3) | 8609(5) | 4339(3)    | 84.0(11)  |
| C00L | 8236(3) | 2741(5) | 7503(2)    | 88.2(12)  |
| C14  | 5443(3) | 3923(4) | 6476(2)    | 75.0(9)   |
| C6   | 8001(3) | 6137(5) | 3185(2)    | 85.4(11)  |
| C17  | 7558(3) | 7626(4) | 5655(2)    | 72.6(8)   |
| C21  | 5806(3) | 7649(4) | 6142.5(19) | 75.3(9)   |
| B1   | 5796(3) | 8785(4) | 3233(2)    | 70.5(10)  |
| C18  | 7696(5) | 9044(6) | 5887(3)    | 117(2)    |
| C20  | 5930(5) | 9043(5) | 6358(3)    | 107.3(17) |
| C19  | 6849(7) | 9768(5) | 6248(3)    | 129(3)    |

**Table S4 Anisotropic Displacement Parameters ( $\text{\AA}^2 \times 10^3$ ) for 2019-mm04. The Anisotropic displacement factor exponent takes the form:  $-2\pi^2[h^2a^*U_{11}+2hka^*b^*U_{12}+\dots]$ .**

| Atom | $U_{11}$  | $U_{22}$ | $U_{33}$ | $U_{23}$ | $U_{13}$  | $U_{12}$  |
|------|-----------|----------|----------|----------|-----------|-----------|
| O2   | 52.7(10)  | 90.3(17) | 68.3(12) | 19.7(11) | 0.9(10)   | 6.5(10)   |
| F1   | 124.4(19) | 141(2)   | 68.5(12) | 47.0(13) | -28.4(13) | -1.5(17)  |
| O1   | 70.8(12)  | 69.0(12) | 53(1)    | 21.0(9)  | -3.1(9)   | 12(1)     |
| F2   | 119.3(19) | 68.1(13) | 145(2)   | 22.2(14) | -18.0(17) | -40.9(13) |
| C15  | 52.2(12)  | 40.7(10) | 44(1)    | 2.8(8)   | -2.0(9)   | 4.6(9)    |
| C10  | 50.2(12)  | 45.0(12) | 49.4(12) | 7.7(9)   | -4.2(10)  | -1.4(9)   |
| C9   | 54.5(12)  | 43.6(11) | 41(1)    | 4.0(9)   | -8.3(9)   | -6.0(9)   |
| N1   | 67.9(14)  | 52.0(12) | 70.5(15) | 13.3(11) | -23.9(12) | -6.5(10)  |
| C8   | 58.2(14)  | 61.5(15) | 43.8(12) | 6.5(10)  | -7.4(10)  | -5.2(12)  |
| N2   | 68.1(14)  | 73.4(15) | 47.6(12) | 13.3(10) | -6.9(10)  | -19.2(12) |
| C12  | 44.8(10)  | 45.5(11) | 43.3(10) | 7.4(9)   | -2.5(9)   | 1.4(9)    |
| C4   | 51.8(12)  | 44.9(11) | 53.3(12) | 3.9(10)  | -13.2(10) | -8.2(9)   |
| C13  | 52.1(12)  | 46.0(12) | 47.4(12) | 12.0(9)  | -2.7(10)  | 0.7(10)   |
| C11  | 72.3(17)  | 48.2(14) | 72.3(18) | 2.9(12)  | -10.2(14) | -10.0(12) |
| C7   | 65.8(16)  | 84(2)    | 56.1(15) | -5.2(15) | 2.6(13)   | 8.4(15)   |
| C3   | 55.4(15)  | 65.5(18) | 67.7(17) | -2.2(12) | -7.0(13)  | -1.5(12)  |
| C16  | 57.4(13)  | 45.4(12) | 46.4(11) | 10.8(9)  | -13.3(10) | -2.2(10)  |
| C1   | 84(2)     | 61.3(18) | 111(3)   | 16.8(19) | -35(2)    | 7.7(17)   |
| C5   | 78(2)     | 116(3)   | 53.1(15) | 13.0(18) | 5.7(15)   | -26(2)    |
| C2   | 65.2(19)  | 80(2)    | 107(3)   | -6(2)    | -19.4(19) | 18.3(17)  |
| C00L | 96(3)     | 97(3)    | 71(2)    | 24.0(18) | -18.6(19) | 30(2)     |
| C14  | 54.7(16)  | 88(2)    | 82(2)    | 37.3(19) | 1.3(14)   | -0.7(15)  |
| C6   | 73.2(19)  | 122(3)   | 60.9(17) | -6.5(19) | 11.1(17)  | -4(2)     |

|     |          |          |          |           |           |           |
|-----|----------|----------|----------|-----------|-----------|-----------|
| C17 | 80.0(19) | 64.0(18) | 73.8(19) | 14.0(14)  | -10.0(16) | -21.3(15) |
| C21 | 81(2)    | 76(2)    | 68.9(19) | -14.5(15) | -15.4(16) | 18.5(17)  |
| B1  | 85(2)    | 63.5(19) | 63.5(18) | 24.1(15)  | -20.4(18) | -18.8(17) |
| C18 | 154(5)   | 81(3)    | 116(4)   | 28(3)     | -44(4)    | -61(3)    |
| C20 | 152(4)   | 78(3)    | 92(3)    | -29(2)    | -38(3)    | 35(3)     |
| C19 | 224(7)   | 47(2)    | 116(4)   | -9(2)     | -78(5)    | 2(3)      |

**Table S5 Bond Lengths for 2019-mm04.**

| Atom | Atom | Length/Å | Atom | Atom | Length/Å  |
|------|------|----------|------|------|-----------|
| O2   | C15  | 1.194(3) | N2   | C5   | 1.348(5)  |
| F1   | B1   | 1.383(4) | N2   | B1   | 1.525(5)  |
| O1   | C15  | 1.326(3) | C12  | C13  | 1.525(3)  |
| O1   | C00L | 1.451(4) | C12  | C16  | 1.534(4)  |
| F2   | B1   | 1.375(5) | C4   | C3   | 1.415(4)  |
| C15  | C13  | 1.490(3) | C13  | C14  | 1.316(4)  |
| C10  | C9   | 1.518(3) | C7   | C6   | 1.379(6)  |
| C10  | C12  | 1.554(3) | C3   | C2   | 1.380(5)  |
| C10  | C11  | 1.529(4) | C16  | C17  | 1.378(4)  |
| C9   | C8   | 1.409(4) | C16  | C21  | 1.376(4)  |
| C9   | C4   | 1.387(4) | C1   | C2   | 1.383(7)  |
| N1   | C4   | 1.396(3) | C5   | C6   | 1.371(7)  |
| N1   | C1   | 1.333(5) | C17  | C18  | 1.387(7)  |
| N1   | B1   | 1.548(5) | C21  | C20  | 1.355(6)  |
| C8   | N2   | 1.393(4) | C18  | C19  | 1.420(10) |
| C8   | C7   | 1.407(5) | C20  | C19  | 1.357(10) |

**Table S6 Bond Angles for 2019-mm04.**

| Atom | Atom | Atom | Angle/°    | Atom | Atom | Atom | Angle/°  |
|------|------|------|------------|------|------|------|----------|
| C15  | O1   | C00L | 116.3(2)   | N1   | C4   | C3   | 107.2(2) |
| O2   | C15  | O1   | 122.6(2)   | C15  | C13  | C12  | 112.6(2) |
| O2   | C15  | C13  | 123.9(2)   | C14  | C13  | C15  | 120.3(2) |
| O1   | C15  | C13  | 113.4(2)   | C14  | C13  | C12  | 127.1(2) |
| C9   | C10  | C12  | 110.94(19) | C6   | C7   | C8   | 108.1(3) |
| C9   | C10  | C11  | 111.8(2)   | C2   | C3   | C4   | 107.3(3) |
| C11  | C10  | C12  | 112.7(2)   | C17  | C16  | C12  | 118.9(3) |
| C8   | C9   | C10  | 122.0(2)   | C21  | C16  | C12  | 121.2(3) |
| C4   | C9   | C10  | 117.7(2)   | C21  | C16  | C17  | 119.9(3) |
| C4   | C9   | C8   | 120.2(2)   | N1   | C1   | C2   | 111.1(3) |
| C4   | N1   | B1   | 124.8(3)   | N2   | C5   | C6   | 110.8(3) |
| C1   | N1   | C4   | 107.5(3)   | C3   | C2   | C1   | 106.8(3) |
| C1   | N1   | B1   | 127.3(3)   | C5   | C6   | C7   | 106.7(4) |
| N2   | C8   | C9   | 120.2(3)   | C16  | C17  | C18  | 119.9(5) |
| N2   | C8   | C7   | 106.8(3)   | C20  | C21  | C16  | 120.4(5) |

|     |     |     |            |     |     |     |          |
|-----|-----|-----|------------|-----|-----|-----|----------|
| C7  | C8  | C9  | 132.9(3)   | F1  | B1  | N1  | 110.5(3) |
| C8  | N2  | B1  | 125.8(3)   | F1  | B1  | N2  | 110.3(4) |
| C5  | N2  | C8  | 107.6(3)   | F2  | B1  | F1  | 110.3(3) |
| C5  | N2  | B1  | 126.4(3)   | F2  | B1  | N1  | 108.5(4) |
| C13 | C12 | C10 | 112.98(19) | F2  | B1  | N2  | 110.9(3) |
| C13 | C12 | C16 | 109.2(2)   | N2  | B1  | N1  | 106.2(2) |
| C16 | C12 | C10 | 111.80(18) | C17 | C18 | C19 | 119.3(5) |
| C9  | C4  | N1  | 120.9(3)   | C21 | C20 | C19 | 121.8(5) |
| C9  | C4  | C3  | 131.9(2)   | C20 | C19 | C18 | 118.7(4) |

**Table S7 Hydrogen Atom Coordinates ( $\text{\AA}\times 10^4$ ) and Isotropic Displacement Parameters ( $\text{\AA}^2\times 10^3$ ) for 2019-mm04.**

| Atom | x        | y        | z        | U(eq)  |
|------|----------|----------|----------|--------|
| H10  | 4885.95  | 5408.75  | 5217.93  | 58     |
| H12  | 7143.34  | 5080.32  | 5259.02  | 53     |
| H11A | 4903.58  | 3680.74  | 4248.69  | 96     |
| H11B | 5345.04  | 3007.53  | 5006.75  | 96     |
| H11C | 6148.67  | 3466.96  | 4361.9   | 96     |
| H7   | 7611.53  | 4780.16  | 4067.65  | 82     |
| H3   | 3614.39  | 6901.48  | 5063.81  | 75     |
| H1   | 3735.89  | 9940.56  | 3464.68  | 103    |
| H5   | 7667.93  | 7882.91  | 2509.14  | 99     |
| H2   | 2613.06  | 8947.55  | 4477.63  | 101    |
| H00A | 8608.99  | 2080.24  | 7167.79  | 132    |
| H00B | 8069.72  | 2237.23  | 7967.98  | 132    |
| H00C | 8686.19  | 3578.56  | 7609.85  | 132    |
| H6   | 8652.72  | 5773.71  | 3000.4   | 102    |
| H17  | 8116.04  | 7132.6   | 5408.72  | 87     |
| H21  | 5158.93  | 7162.23  | 6240.4   | 90     |
| H18  | 8348.67  | 9525.72  | 5805.63  | 140    |
| H20  | 5356.96  | 9526.94  | 6592.61  | 129    |
| H19  | 6925.51  | 10740.46 | 6409.95  | 155    |
| H14A | 5420(30) | 3260(50) | 6850(30) | 88(12) |
| H14B | 4730(30) | 4150(40) | 6310(20) | 77(11) |

### Experimental

A suitable crystal was selected and **mounted** on a **XtaLAB AFC12 (RCD3): Kappa** single diffractometer. The crystal was kept at 100(2) K during data collection. Using Olex2<sup>[S1]</sup>, the structure was solved with the ShelXT<sup>[S2]</sup> structure solution program using Intrinsic Phasing and refined with the ShelXL<sup>[S3]</sup> refinement package using Least Squares minimisation.

### Crystal structure determination of [2019-mm04]

**Crystal Data** for  $\text{C}_{22}\text{H}_{21}\text{BF}_2\text{N}_2\text{O}_2$  ( $M = 394.22$  g/mol): orthorhombic, space group  $\text{Pca}2_1$  (no. 29),  $a = 12.6493(2)$   $\text{\AA}$ ,  $b = 9.2440(2)$   $\text{\AA}$ ,  $c = 18.0005(3)$   $\text{\AA}$ ,  $V = 2104.80(7)$   $\text{\AA}^3$ ,  $Z = 4$ ,  $T = 100(2)$  K,  $\mu(\text{MoK}\alpha) = 0.091$   $\text{mm}^{-1}$ ,  $D_{\text{calc}} = 1.244$   $\text{g/cm}^3$ , 28599 reflections measured ( $6.318^\circ \leq 2\theta \leq 61.47^\circ$ ), 6184 unique ( $R_{\text{int}}$



= 0.0266,  $R_{\text{sigma}} = 0.0208$ ) which were used in all calculations. The final  $R_1$  was 0.0612 ( $I > 2\sigma(I)$ ) and  $wR_2$  was 0.1622 (all data).

### Refinement model description

Number of restraints - 1, number of constraints - unknown.

Details:

1. Fixed Uiso

At 1.2 times of:

All C(H) groups

At 1.5 times of:

All C(H,H,H) groups

2.a Ternary CH refined with riding coordinates:

C10(H10), C12(H12)

2.b Aromatic/amide H refined with riding coordinates:

C7(H7), C3(H3), C1(H1), C5(H5), C2(H2), C6(H6), C17(H17), C21(H21), C18(H18),  
C20(H20), C19(H19)

2.c Idealised Me refined as rotating group:

C11(H11A,H11B,H11C), C00L(H00A,H00B,H00C)

## Photophysical properties

Absorption spectra were recorded on a Perkin–Elmer Lambda 650 UV/Vis spectrophotometer with a temperature-controlled cell.

Steady-state fluorescence emission spectra were performed on a JASCO FP-6500 spectrofluorometer equipped with a 450 W xenon lamp for excitation.

Fluorescence-decay traces of solutions were recorded by the single-photon timing method on a FluoTime 200 fluorometer (PicoQuant, Inc.). The excitation was achieved with an LDH-505 laser head (PicoQuant, Inc.), and the observation was performed through a monochromator at corresponded emission wavelengths. The pulse repetition rate was 20 MHz. Fluorescence-decay histograms were collected in 1320 channels using cuvettes 10×10 mm. The time increment per channel was 36 ps. Histograms of the instrument-response functions (using a LUDOX scatterer) and sample decays were re-recorded until they typically reached  $2 \times 10^4$  counts in the maximum I. Three fluorescence decays were recorded for all of the samples. The fluorescence-decay traces were individually analyzed by using an iterative deconvolution method with exponential models that employed FluoFit software (PicoQuant, Inc.).

## Quantum yield and data analysis

The relative fluorescence quantum yield values were determined using the Knowing formula:

$$\Phi = \Phi_R \frac{I}{I_R} \frac{OD_R}{OD} \frac{n^2}{n_R^2} \quad [\text{Eq. S1}]$$

where  $\Phi$  and  $\Phi_R$  denote the fluorescence quantum yield of the sample and the reference, respectively,  $I$  and  $I_R$  the integrated fluorescence spectra of the sample and the reference,  $OD$  and  $OD_R$  the absorption at the excitation wavelength of the sample and the reference and  $n$  and  $n_R$  the refractive index of the solvent where the sample and reference are dissolved. As references, we have used Fluorescein in 0,1 M NaOH ( $\Phi = 0.95$ )<sup>[S4]</sup>. The dyes and reference were excited at the maximum of each dye (see table).

Data graphical representation and quantum yield calculation was realized using Originpro 8.5 software (OriginLab, corp). Fluorescence decay curves were analyzed individually and globally through an iterative deconvolution method with exponential models using the software FluoFit (PicoQuant, Inc.).

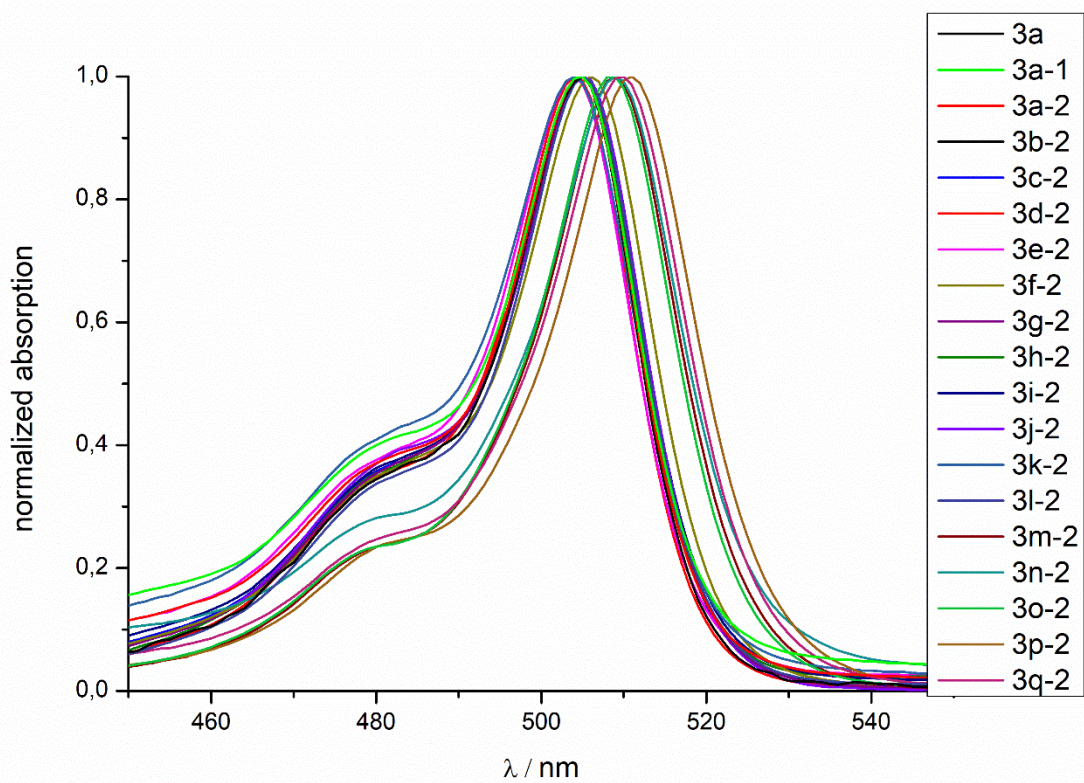

**Figure S1.** Absorbance spectra of compounds **3a-s** ( $1 \times 10^{-6}$  M in chloroform).

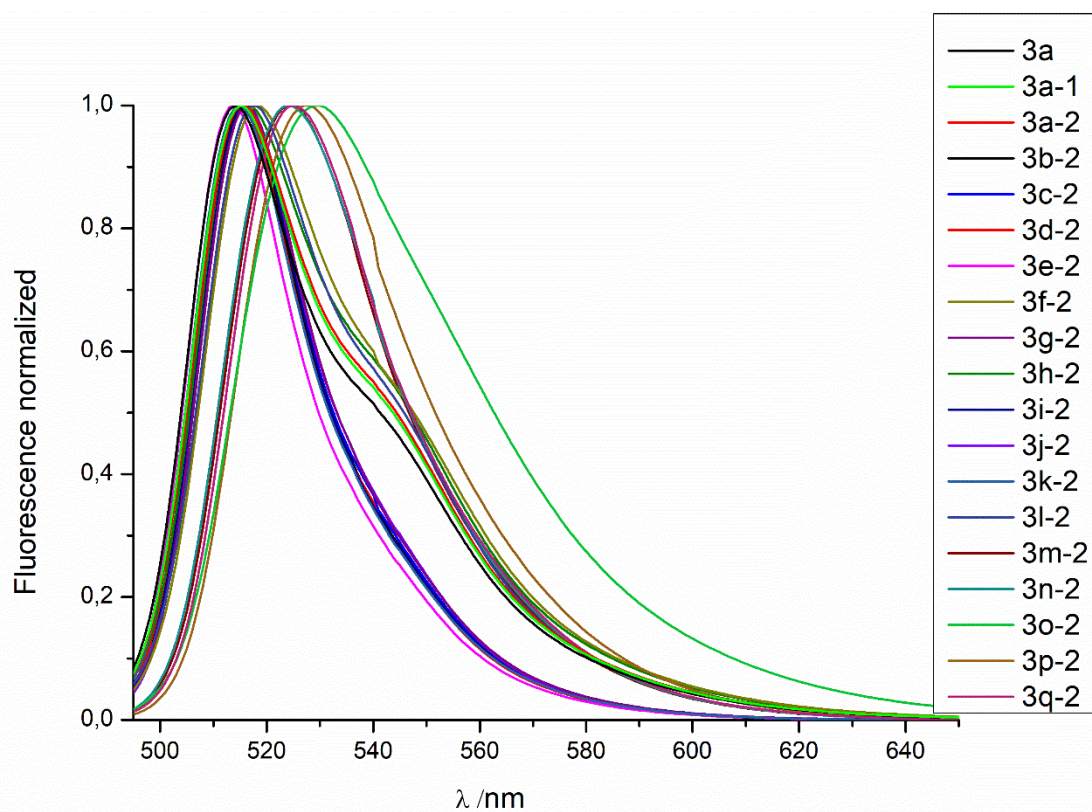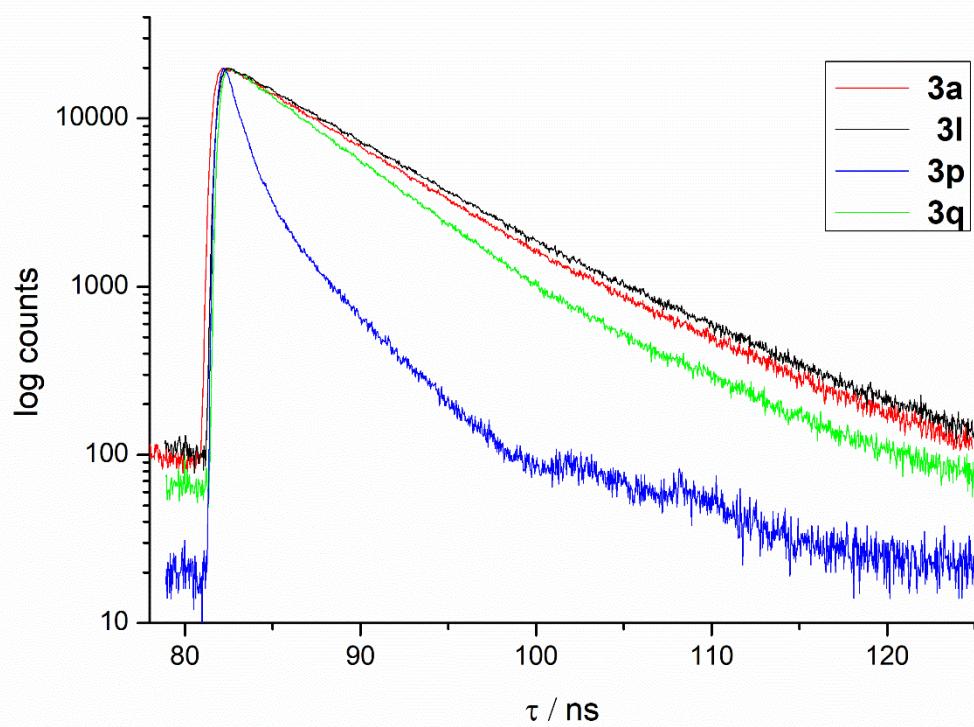

**Figure S2.** A) Fluorescence spectra of compounds **3a-s** ( $1 \times 10^{-6}$  M in chloroform).

b) Fluorescence decay profiles of selected compound **3a**, **3l**, **3p** and **3q**. For clarity we selected a representative decay for the similar fluorescence lifetime

**Table S8:** Maximum absorption and molar extinction coefficient at this maximum

| <b>Compound</b> | <b>Catalyst</b> | $\lambda_{\text{abs}}^{\text{max}} / \text{nm}$ | $\epsilon_{\text{max}} / \text{M}^{-1}\text{cm}^{-1}$ |
|-----------------|-----------------|-------------------------------------------------|-------------------------------------------------------|
| <b>3a</b>       | -               | 505                                             | 95100                                                 |
| <b>3a</b>       | II              | 505                                             | 89416                                                 |
| <b>3a</b>       | I               | 505                                             | 74767                                                 |
| <b>3b</b>       | II              | 505                                             | 94023                                                 |
| <b>3c</b>       | II              | 505                                             | 38116                                                 |
| <b>3d</b>       | II              | 504                                             | 41578                                                 |
| <b>3e</b>       | II              | 504                                             | 68124                                                 |
| <b>3f</b>       | II              | 506                                             | 53860                                                 |
| <b>3g</b>       | II              | 505                                             | 82534                                                 |
| <b>3h</b>       | II              | 505                                             | 90506                                                 |
| <b>3i</b>       | II              | 505                                             | 65809                                                 |
| <b>3j</b>       | II              | 505                                             | 98484                                                 |
| <b>3k</b>       | II              | 504                                             | 69203                                                 |
| <b>3l</b>       | II              | 505                                             | 14898                                                 |
| <b>3m</b>       | II              | 509                                             | 90854                                                 |
| <b>3n</b>       | II              | 509                                             | 67147                                                 |
| <b>3o</b>       | II              | 509                                             | 73151                                                 |
| <b>3p</b>       | II              | 511                                             | 14499                                                 |
| <b>3q</b>       | II              | 510                                             | 80329                                                 |



### Electronic circular dichroism measurements

Electronic circular dichroism (ECD) was recorded in an Olis DSM172 spectrophotometer equipped with a xenon lamp of 150 W. The spectra were recorded at  $1 \times 10^{-6}$  M concentrations in HPLC grade solvents and room temperature. For ECD measurements a fixed slitwidth of 1mm and 0.1 s of integration time were selected, the ECD spectra showed in Figure S4 are an average spectra calculated after 50 scans (each one).

### Theoretical calculations

All the calculations were performed by using the Gaussian 09 suite.<sup>[S5]</sup> Geometry optimizations of seven conformations of compound **3a** were carried out at DFT-CAMB3LYP/6-31G(d,p) level of theory. Harmonic frequencies were calculated in order to corroborate that found geometries were true minima. Electronic transitions were studied by TD-DFT method at the same level of theory. Figure S3 shows the conformation of the six calculated geometries.

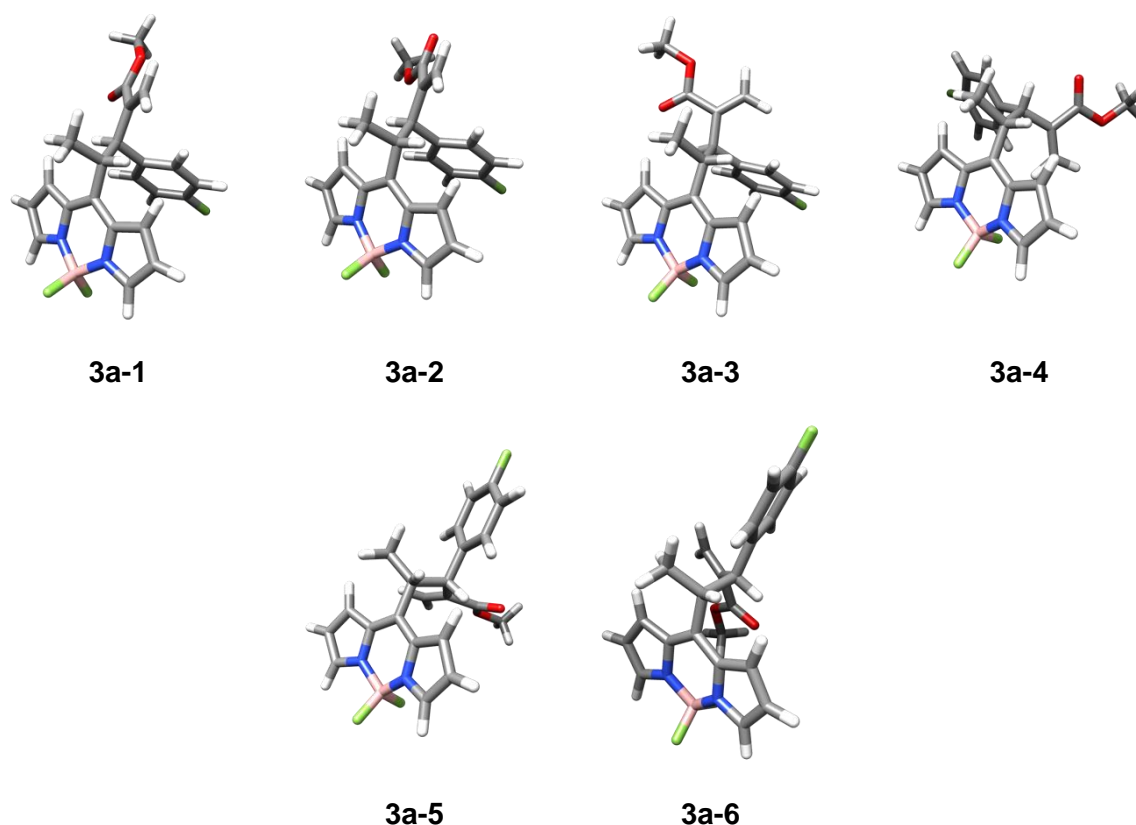

**Figure S3.** Calculated geometries for the 7 less energetic conformations of compound **3a**.

According to the calculated relative energies of the optimized conformers of compound **3a**, the corresponding Boltzmann distribution was determined using the equation S2:

$$\frac{N_i}{N} = \frac{e^{\frac{-E_i}{RT}}}{\sum_i e^{\frac{-E_i}{RT}}} \quad [\text{Eq. S2}]$$

Where  $N$  is the number of molecules of the system,  $N_i$  is the number of molecules for each conformer,  $E_i$  is the relative energy for each conformer,  $R$  is the Boltzmann constant in kcal mol<sup>-1</sup> K<sup>-1</sup>, and  $T$  is the assumed constant temperature (298.15 K).

Simulated UV-Vis and ECD spectra were calculated for the four less energetic conformations. Boltzmann weighted spectra were obtained using SpecDis version 1.71<sup>[S6]</sup> and corrected with a UV shift of -0.55 eV to better fit the experimental ones.

**Table S9.** Calculated energies (a.u.), relative energies (kcal mol<sup>-1</sup>) and Boltzmann distribution of the optimized conformers of compound **3a**.

| Compound    | Calculated energy (a.u.) | Relative energy (kcal mol <sup>-1</sup> ) | Boltzmann distribution at 298.15 K |
|-------------|--------------------------|-------------------------------------------|------------------------------------|
| <b>3a-1</b> | -1433.905029             | 0.00                                      | 61.91                              |
| <b>3a-2</b> | -1433.903907             | 0.70                                      | 18.86                              |
| <b>3a-3</b> | -1433.903925             | 0.69                                      | 19.22                              |
| <b>3a-4</b> | -1433.896484             | 5.36                                      | 0.01                               |
| <b>3a-5</b> | -1433.894261             | 6.76                                      | 0.00                               |
| <b>3a-6</b> | -1433.894773             | 6.44                                      | 0.00                               |

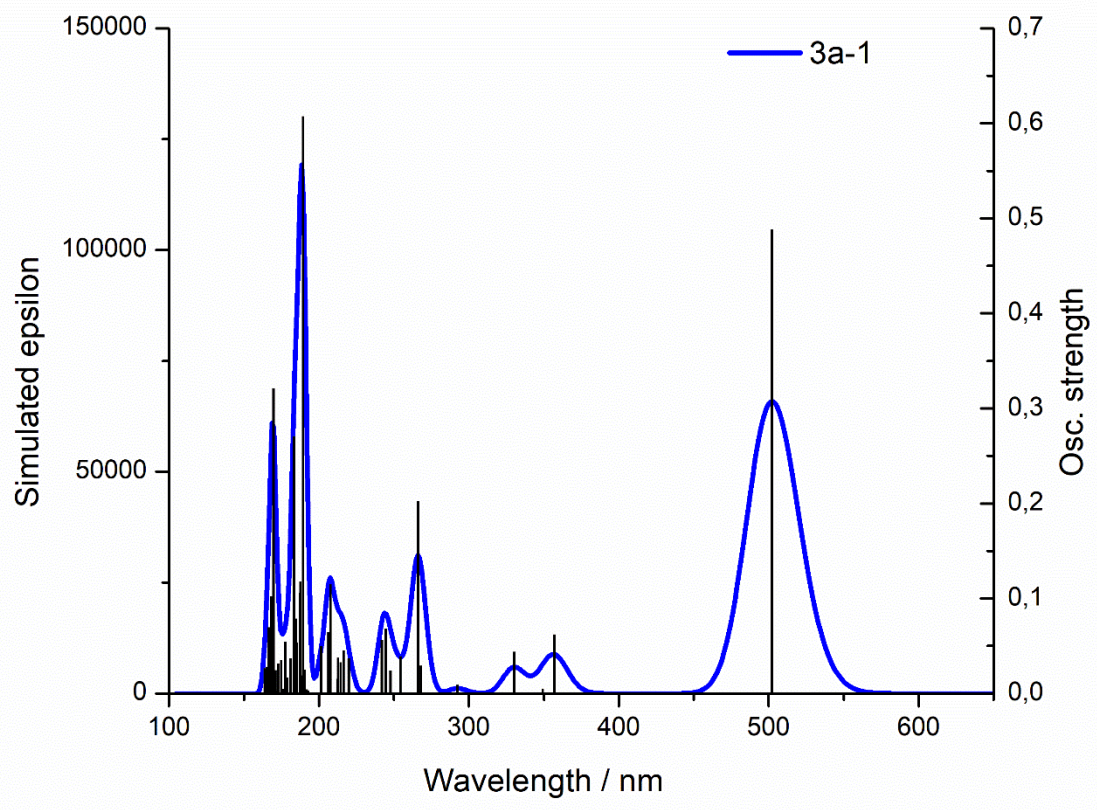



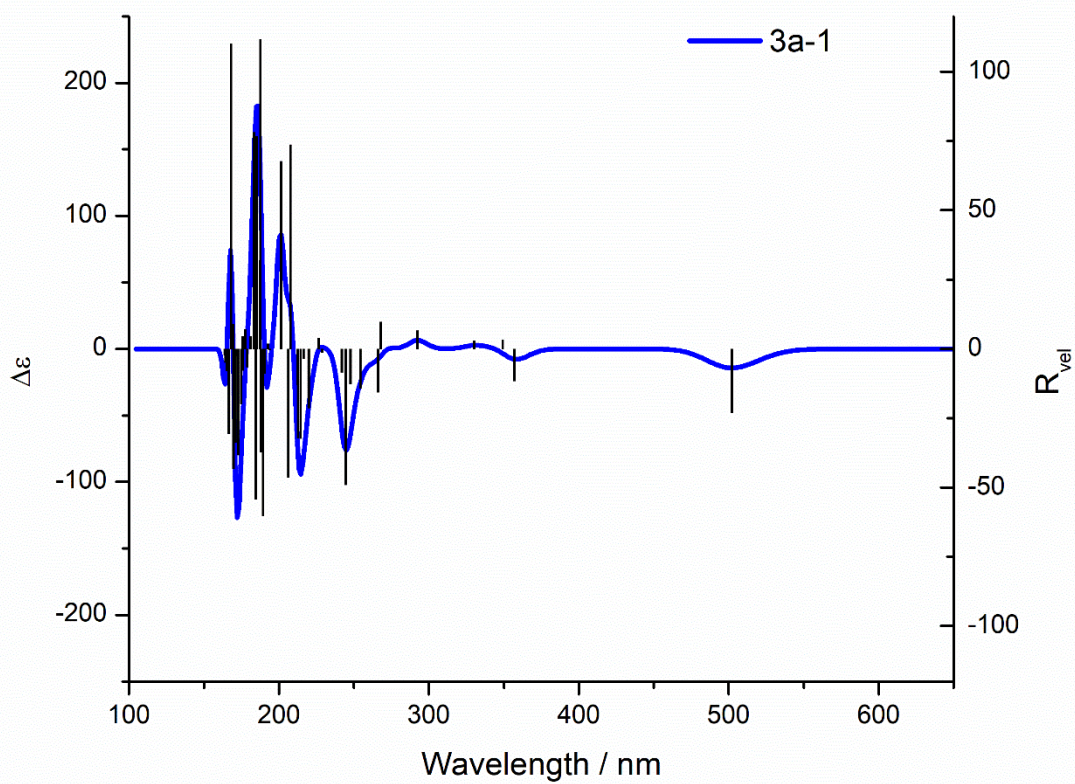

**Figure S4.** Top: Calculated electronic transitions and simulated UV-Vis spectrum of conformer (R,R)-**3a-1**. Bottom: Calculated electronic transitions and simulated ECD spectrum of conformer (R,R)-**3a-1**.

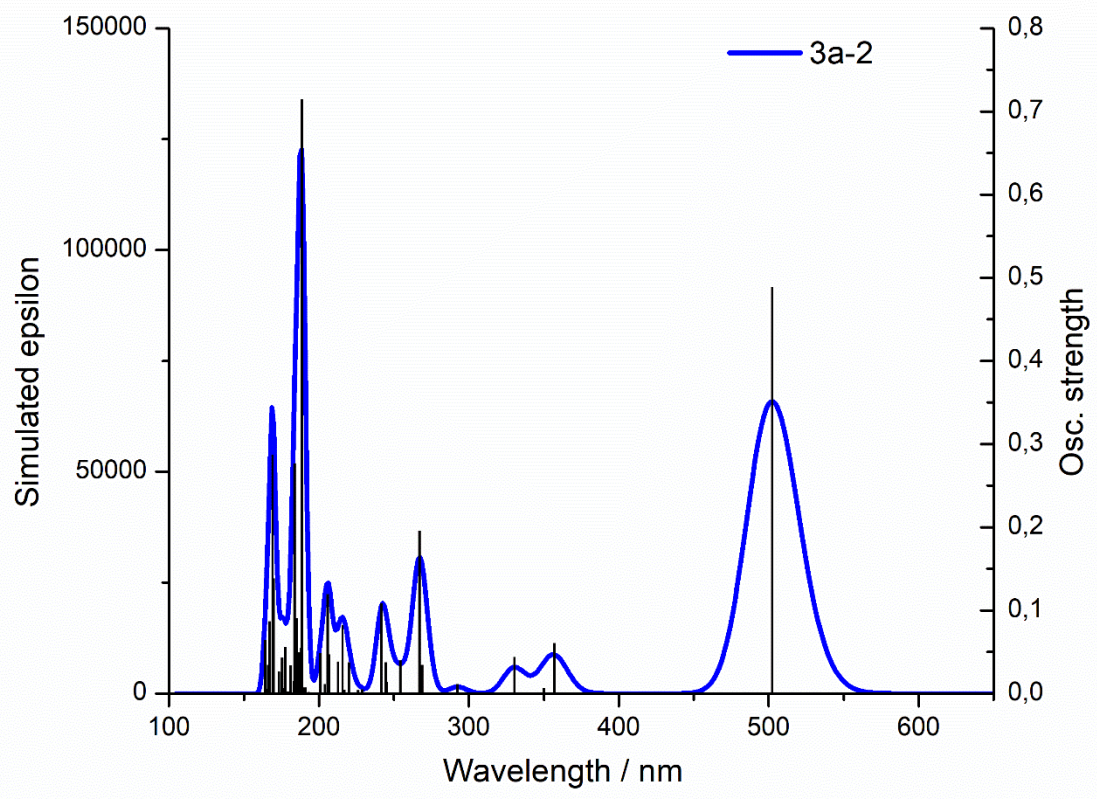

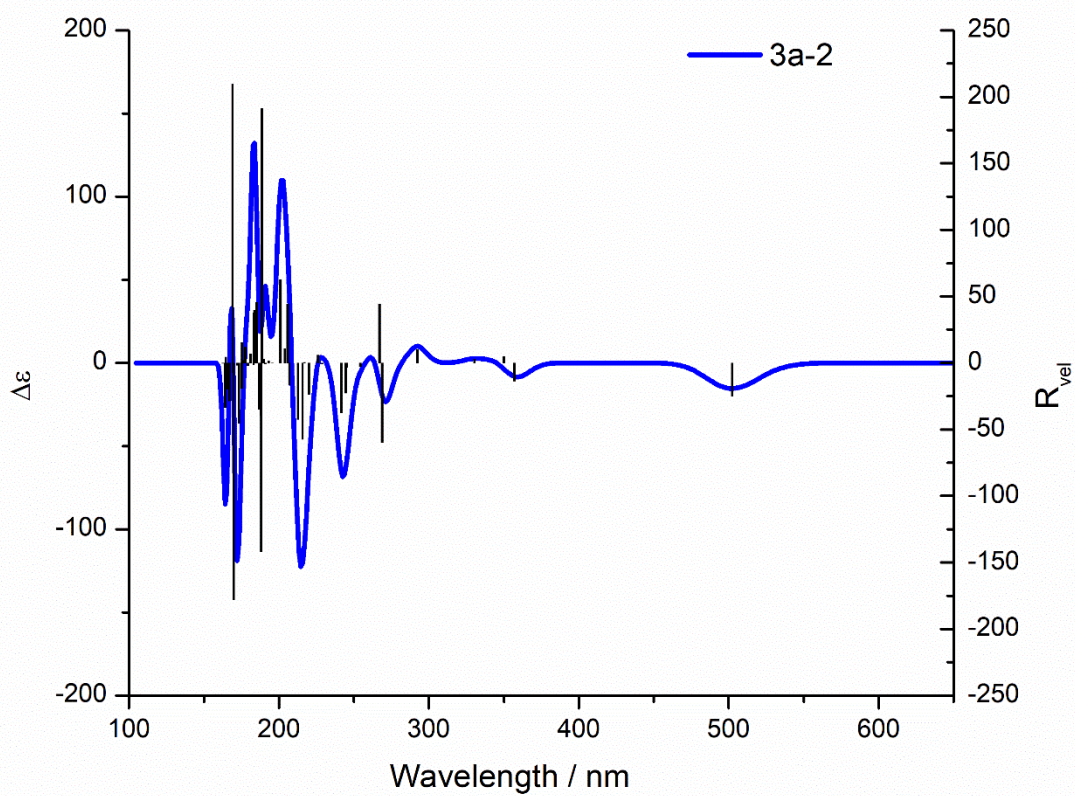

**Figure S5.** Top: Calculated electronic transitions and simulated UV-Vis spectrum of conformer (R,R)-**3a-2**. Bottom: Calculated electronic transitions and simulated ECD spectrum of conformer (R,R)-**3a-2**.



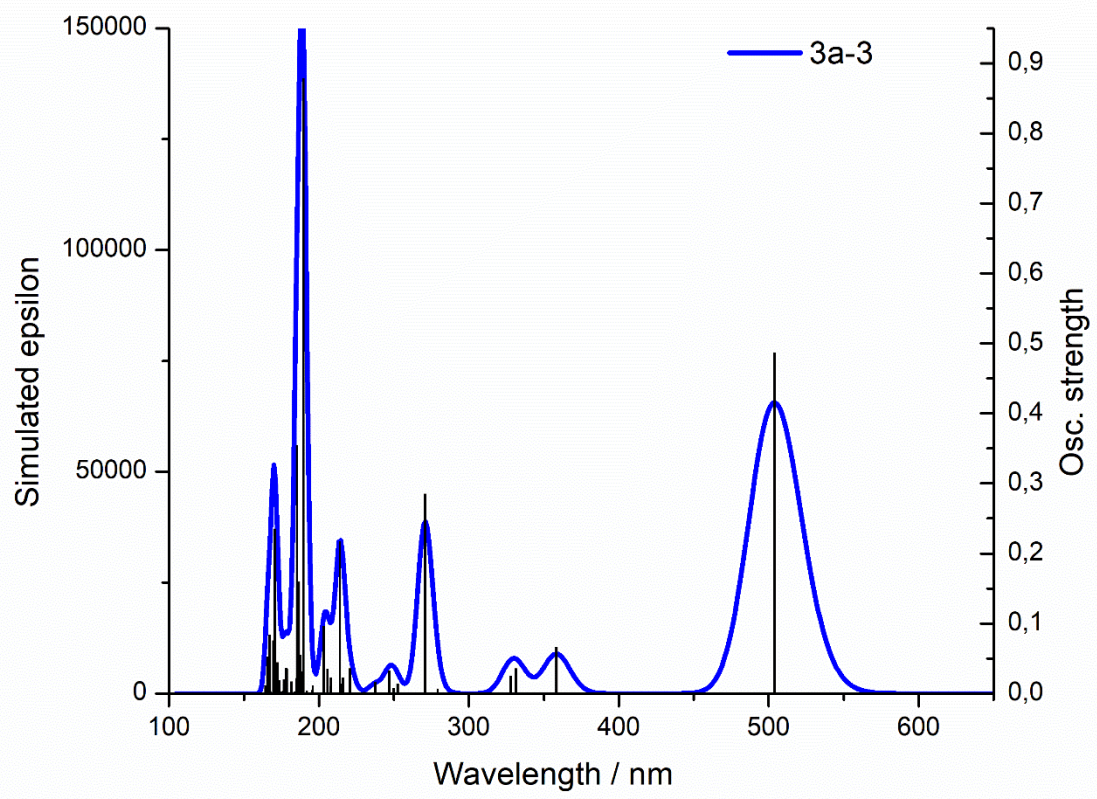

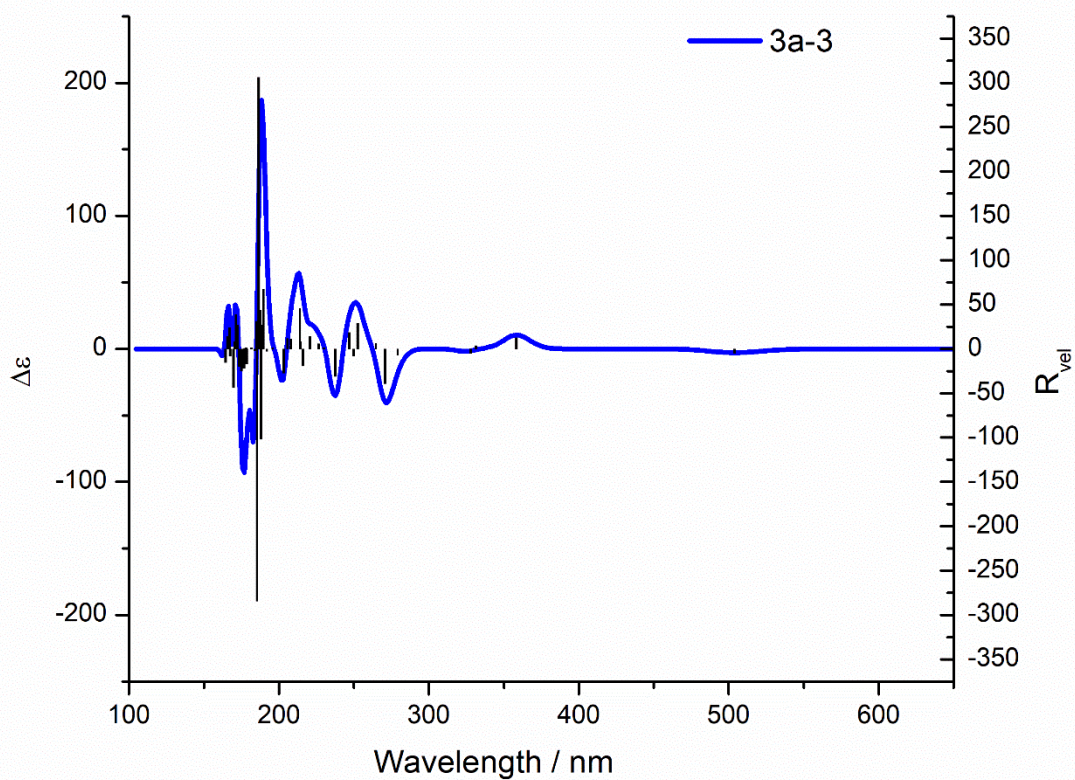

**Figure S6.** Top: Calculated electronic transitions and simulated UV-Vis spectrum of conformer (R,R)-**3a-3**. Bottom: Calculated electronic transitions and simulated ECD spectrum of conformer (R,R)-**3a-3**.

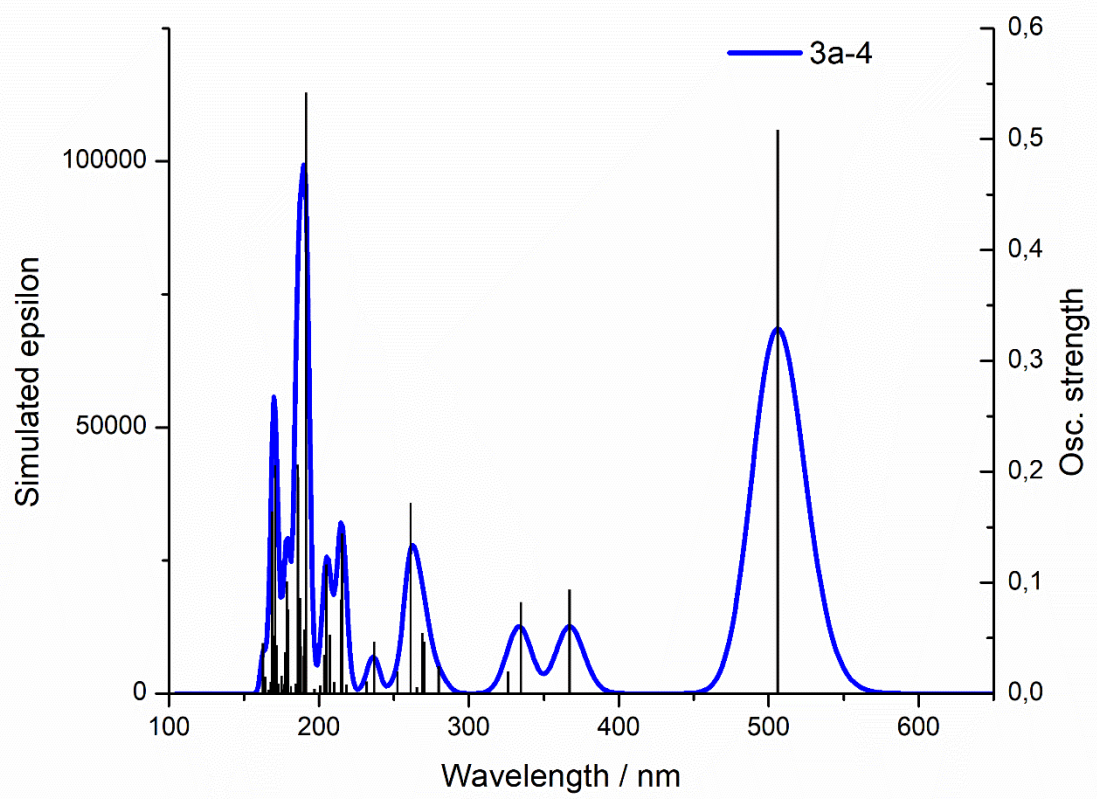



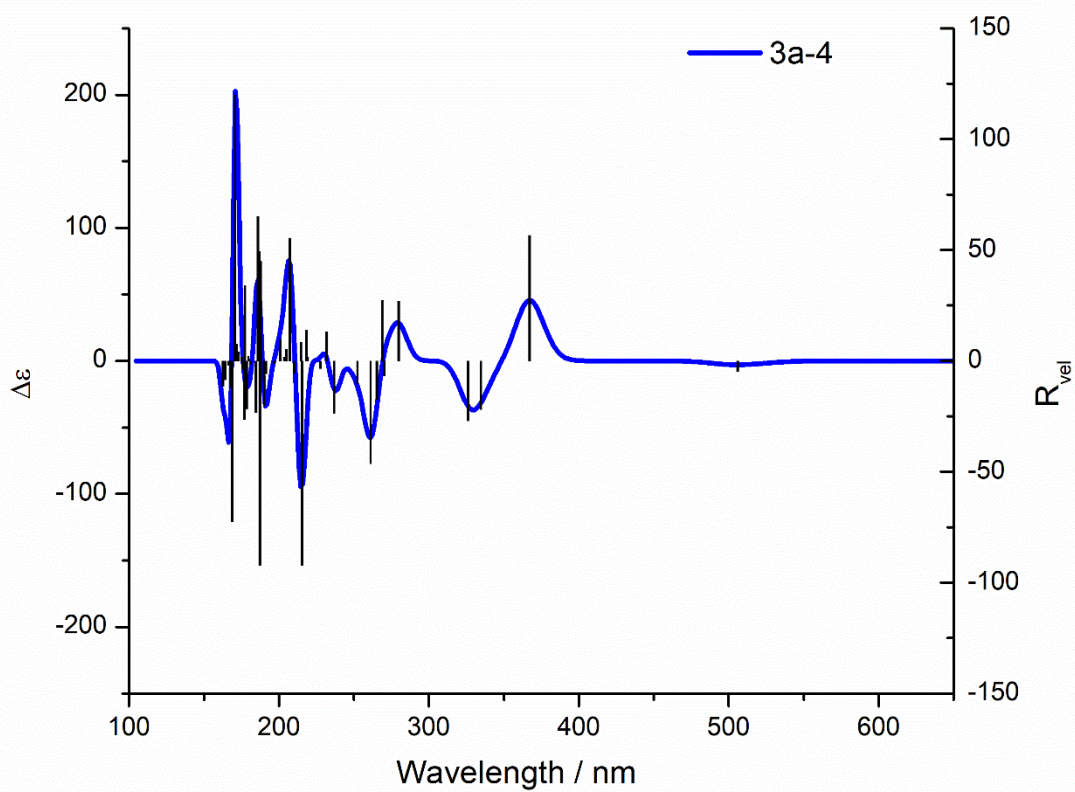

**Figure S7.** Top: Calculated electronic transitions and simulated UV-Vis spectrum of conformer (R,R)-**3a-4**. Bottom: Calculated electronic transitions and simulated ECD spectrum of conformer (R,R)-**3a-4**.

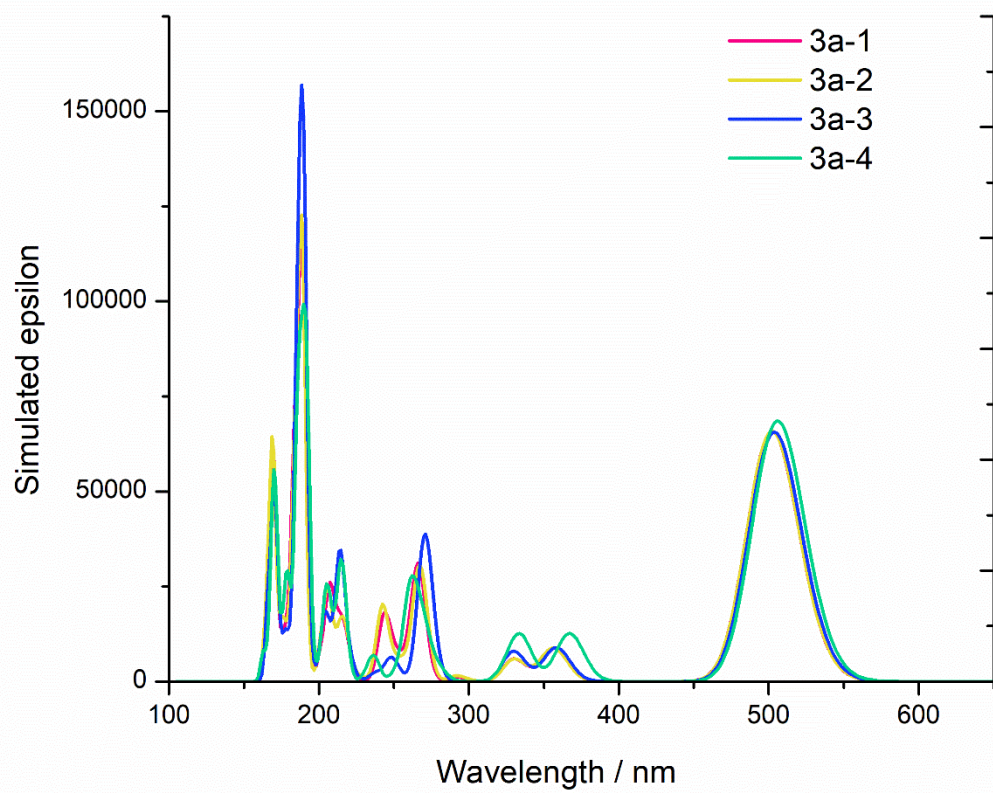



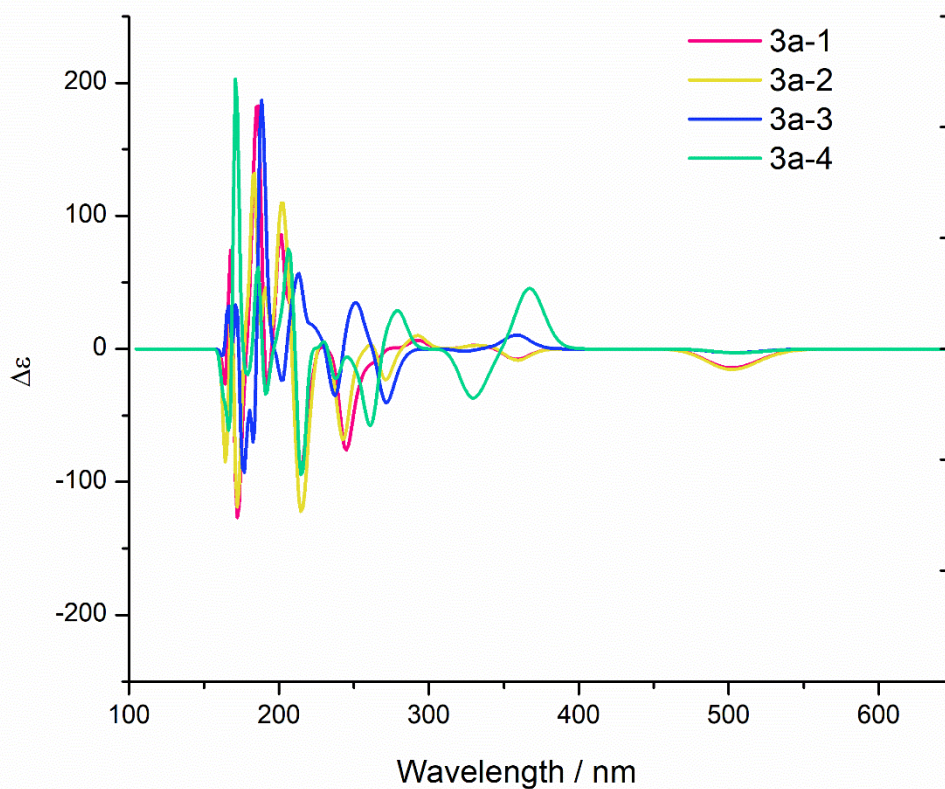

**Figure S8.** Top: Overlapped simulated UV-Vis spectra of conformers (R,R)-**3a-1** to **3a-4**. Bottom: Overlapped simulated ECD spectra of conformer (R,R)-**3a-4** to **3a-4**.

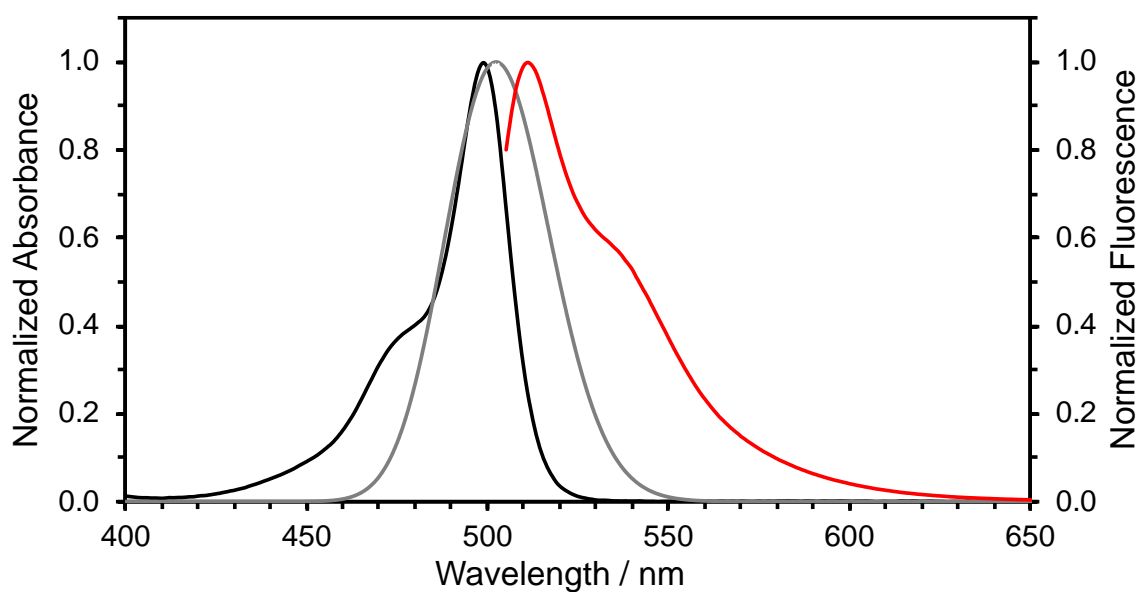

**Figure S9.** Experimental absorbance (black) and fluorescence (red) of compound **3a**, and simulated Boltzmann weighted (CAM-B3LYP/6-31G(d,p)) UV-vis spectrum of compounds **3a** (gray).

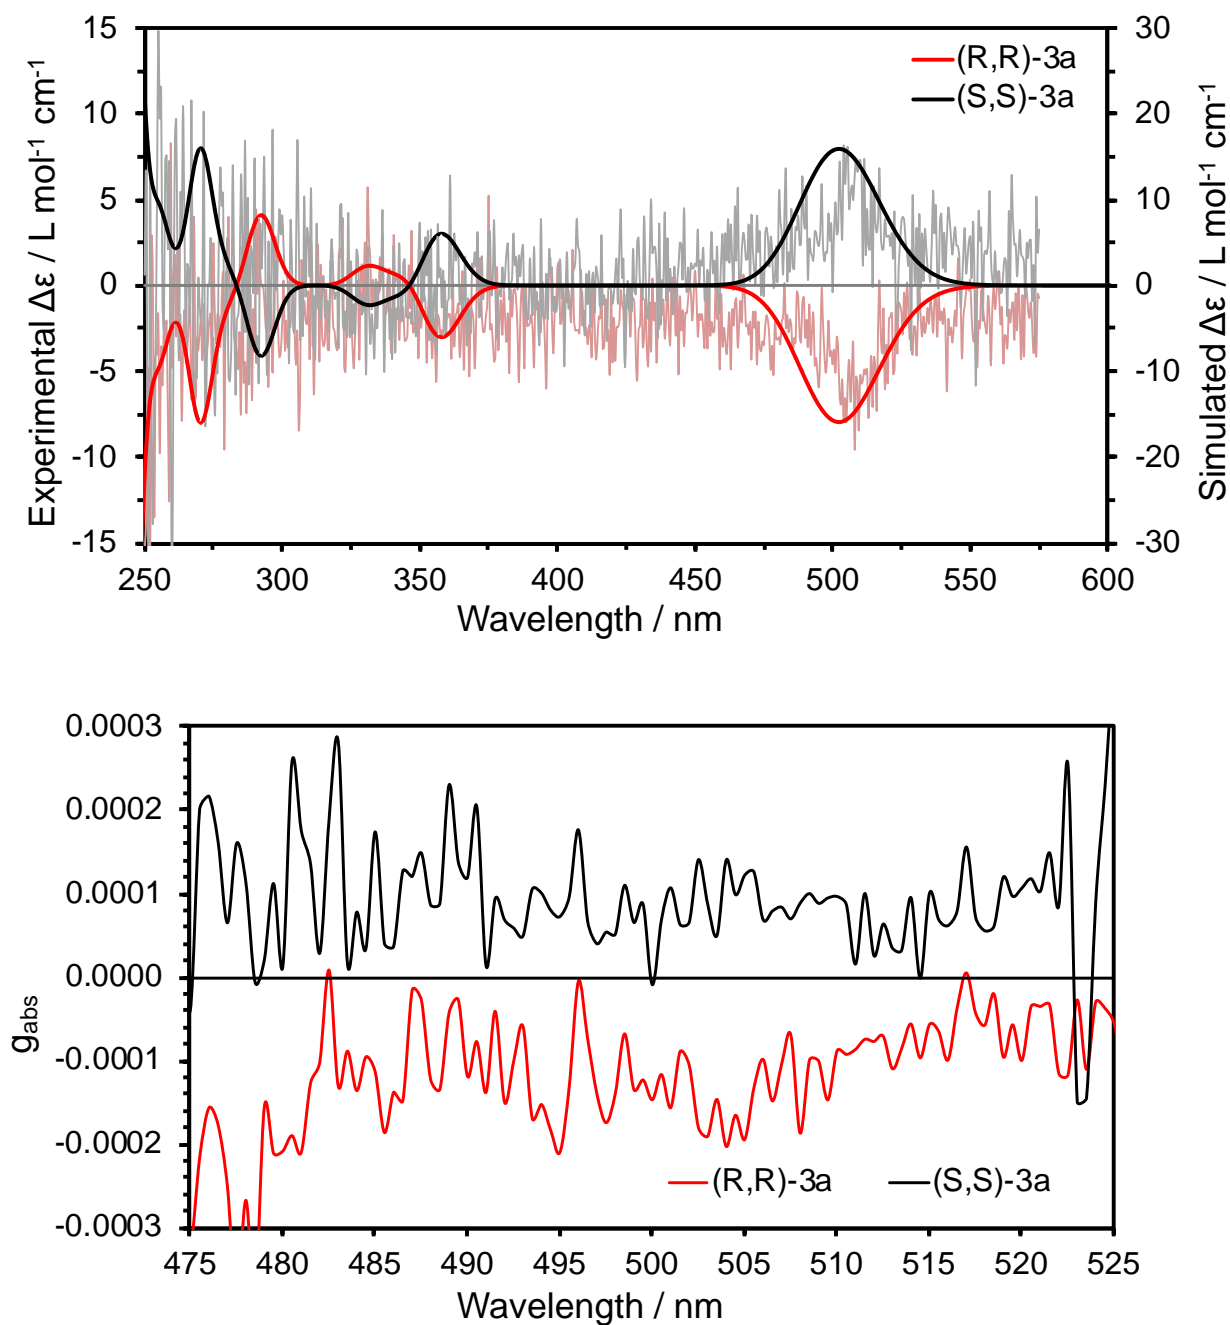

**Figure S10.** Top: Experimental ECD spectra of compounds (S,S)- (gray) and (R,R)-**3a** (pale red) measured at  $1 \times 10^{-6}$  M in  $\text{CHCl}_3$  and simulated Boltzmann weighted (CAM-B3LYP/6-31G(d,p)) ECD spectra of compounds (S,S)- (black) and (R,R)-**3a** (red). Bottom: Partial experimental  $g_{\text{abs}}$  spectra of compounds (S,S)- (black) and (R,R)-**3a** (red) measured at  $1 \times 10^{-6}$  M in  $\text{CHCl}_3$ .

**Table S10 Geometries****(R,R)-3a-1**

|   |             |             |             |
|---|-------------|-------------|-------------|
| C | 1.85753900  | 0.04777300  | 1.33243700  |
| N | 3.14346000  | 0.30146100  | 0.86531900  |
| B | 3.83125600  | -0.41107400 | -0.32595000 |
| N | 2.71111600  | -1.23384700 | -1.01158000 |
| C | 1.43472300  | -1.46984300 | -0.50721800 |
| C | 0.99865600  | -0.83610900 | 0.66809600  |
| C | 2.84746000  | -1.91471100 | -2.15067300 |
| C | 1.67282300  | -2.62386400 | -2.43546300 |
| C | 0.78786100  | -2.35085600 | -1.40726500 |
| C | 1.66142200  | 0.85270600  | 2.48182200  |
| C | 2.82151900  | 1.57623700  | 2.68581000  |
| C | 3.70982800  | 1.20513600  | 1.66496200  |
| C | -0.37843300 | -1.09235600 | 1.25239300  |
| F | 4.35771000  | 0.51601200  | -1.20590600 |
| F | 4.82707000  | -1.25718800 | 0.13706700  |
| C | -0.51722200 | -2.56546700 | 1.67181000  |
| C | -1.51638000 | -0.61349900 | 0.30939500  |
| C | -2.89928300 | -0.72078800 | 0.92620700  |
| C | -1.29085800 | 0.80826500  | -0.19829800 |
| C | -3.19377900 | -0.65538400 | 2.22335300  |
| C | -0.94340100 | 1.03388600  | -1.52996900 |
| C | -0.71568800 | 2.31933100  | -2.00696700 |
| C | -0.84134500 | 3.38063900  | -1.12980100 |
| C | -1.18991800 | 3.19965500  | 0.19735000  |
| C | -1.41644700 | 1.90756300  | 0.65246100  |
| F | -0.62543000 | 4.63045500  | -1.58089100 |
| C | -3.99128500 | -0.87969200 | -0.08522800 |
| O | -3.78829200 | -1.07856500 | -1.26476400 |
| O | -5.21871400 | -0.78767100 | 0.43665500  |
| C | -6.29798200 | -0.95529200 | -0.48902100 |
| H | 3.77091800  | -1.87200900 | -2.71102400 |
| H | 1.50462100  | -3.25469400 | -3.29535600 |
| H | -0.21476100 | -2.73764600 | -1.31521700 |
| H | 0.76560800  | 0.90248700  | 3.08189500  |
| H | 3.01949500  | 2.29437500  | 3.46731800  |
| H | 4.71826200  | 1.54932100  | 1.48191800  |
| H | -0.44084300 | -0.49287300 | 2.16133300  |
| H | -0.52854900 | -3.23649100 | 0.81218300  |
| H | 0.31842300  | -2.85697100 | 2.31220800  |
| H | -1.44111700 | -2.71736200 | 2.23006700  |
| H | -1.53088500 | -1.25792500 | -0.56953500 |
| H | -4.22041300 | -0.70560300 | 2.56299200  |
| H | -2.42841500 | -0.55626800 | 2.98505800  |
| H | -0.84868700 | 0.19255000  | -2.20809000 |
| H | -0.44639700 | 2.50326700  | -3.04040900 |
| H | -1.28518200 | 4.05914500  | 0.85054900  |
| H | -1.71131300 | 1.75954300  | 1.68640600  |

|   |             |             |             |
|---|-------------|-------------|-------------|
| H | -7.20860000 | -0.83938900 | 0.09499700  |
| H | -6.24746400 | -0.19898500 | -1.27363100 |
| H | -6.25999300 | -1.94601000 | -0.94481600 |

**(R,R)-3a-2**

|   |             |             |             |
|---|-------------|-------------|-------------|
| C | 1.84797300  | 0.18665200  | 1.28523500  |
| N | 3.10312200  | 0.41767900  | 0.72994800  |
| B | 3.74690700  | -0.39300900 | -0.42284400 |
| N | 2.61402500  | -1.30052900 | -0.96596300 |
| C | 1.36928700  | -1.50796200 | -0.37793500 |
| C | 0.97812600  | -0.77205600 | 0.75413600  |
| C | 2.70981900  | -2.08504600 | -2.04103100 |
| C | 1.53783800  | -2.83630200 | -2.19857800 |
| C | 0.69810600  | -2.48061700 | -1.15728600 |
| C | 1.69012900  | 1.09659200  | 2.36029000  |
| C | 2.84129900  | 1.85759600  | 2.43351100  |
| C | 3.68679900  | 1.40479600  | 1.40864400  |
| C | -0.36204000 | -0.99795800 | 1.43016600  |
| F | 4.20272300  | 0.45516200  | -1.41464000 |
| F | 4.78640700  | -1.16949000 | 0.06428200  |
| C | -0.45080400 | -2.43376500 | 1.97462500  |
| C | -1.55449500 | -0.60874400 | 0.51028500  |
| C | -2.90234800 | -0.68326900 | 1.20722800  |
| C | -1.37098600 | 0.77453500  | -0.10961400 |
| C | -3.12329900 | -0.56050400 | 2.51477300  |
| C | -1.03675800 | 0.90541100  | -1.45750100 |
| C | -0.84018600 | 2.15484400  | -2.03307200 |
| C | -0.98410600 | 3.27751100  | -1.23858000 |
| C | -1.32041200 | 3.19083700  | 0.10093400  |
| C | -1.51521100 | 1.93268400  | 0.65569300  |
| F | -0.79891700 | 4.49302600  | -1.78610500 |
| C | -4.12054800 | -0.84881300 | 0.34780600  |
| O | -5.26152500 | -0.81436200 | 0.75467300  |
| O | -3.81408400 | -1.05162800 | -0.93970900 |
| C | -4.92878500 | -1.20866300 | -1.82452000 |
| H | 3.60428900  | -2.08160900 | -2.64804900 |
| H | 1.34175800  | -3.54973300 | -2.98488200 |
| H | -0.29029400 | -2.87348500 | -0.97851900 |
| H | 0.82379900  | 1.18837900  | 2.99736000  |
| H | 3.06083300  | 2.65228300  | 3.13059100  |
| H | 4.67665100  | 1.74811700  | 1.14172000  |
| H | -0.38877500 | -0.32697100 | 2.28946300  |
| H | -0.49090900 | -3.17423800 | 1.17530100  |
| H | 0.42241700  | -2.65729000 | 2.59186600  |
| H | -1.34119300 | -2.55551600 | 2.59112600  |
| H | -1.58795600 | -1.31992000 | -0.31461700 |

|   |             |             |             |
|---|-------------|-------------|-------------|
| H | -4.13898200 | -0.58624000 | 2.89130300  |
| H | -2.32460000 | -0.43667500 | 3.23629000  |
| H | -0.92597500 | 0.01699300  | -2.07028100 |
| H | -0.58054000 | 2.26492700  | -3.07942200 |
| H | -1.43149000 | 4.09542700  | 0.68730100  |
| H | -1.80071800 | 1.85811300  | 1.70017700  |
| H | -5.55685300 | -0.31691300 | -1.80528100 |
| H | -4.50253700 | -1.35426100 | -2.81484100 |
| H | -5.52693300 | -2.07330400 | -1.53307400 |

**(R,R)-3a-3**

|   |             |             |             |
|---|-------------|-------------|-------------|
| C | 1.81478500  | -0.22342000 | 1.34353400  |
| N | 3.12632800  | -0.40082400 | 0.91765000  |
| B | 3.55323800  | -1.03250200 | -0.43140900 |
| N | 2.28486400  | -1.74808000 | -0.96217200 |
| C | 0.98364700  | -1.55134800 | -0.50469100 |
| C | 0.73623700  | -0.76809600 | 0.63249800  |
| C | 2.24315500  | -2.58531100 | -1.99892400 |
| C | 0.91972900  | -2.96851500 | -2.26063300 |
| C | 0.12605800  | -2.32264200 | -1.32942100 |
| C | 1.86039600  | 0.48575600  | 2.56725200  |
| C | 3.19208400  | 0.72078000  | 2.86142300  |
| C | 3.93865600  | 0.15954400  | 1.81524000  |
| C | -0.67141800 | -0.55077400 | 1.15125200  |
| F | 3.95073000  | -0.04372000 | -1.31733700 |
| F | 4.57367800  | -1.94473500 | -0.23516700 |
| C | -1.24178000 | -1.86210500 | 1.71775100  |
| C | -1.56656900 | 0.15301600  | 0.08279900  |
| C | -3.03267900 | 0.14885900  | 0.49016700  |
| C | -1.05099800 | 1.53548700  | -0.28313000 |
| C | -3.64792100 | 1.10914000  | 1.17751500  |
| C | -0.96435500 | 1.88756300  | -1.63174900 |
| C | -0.52373400 | 3.14297200  | -2.02958600 |
| C | -0.16334000 | 4.05448900  | -1.05388700 |
| C | -0.22773400 | 3.74780400  | 0.29284200  |
| C | -0.67059700 | 2.48500000  | 0.66839100  |
| F | 0.26683000  | 5.27433700  | -1.42539400 |
| C | -3.79988700 | -1.04551400 | 0.01907200  |
| O | -3.33980600 | -1.89701300 | -0.71732600 |
| O | -5.05249500 | -1.09266900 | 0.47905600  |
| C | -5.83654600 | -2.20632700 | 0.03529400  |
| H | 3.15089800  | -2.87498400 | -2.50965200 |
| H | 0.59830600  | -3.64523600 | -3.03821600 |
| H | -0.94794100 | -2.40133600 | -1.23840300 |
| H | 1.01238200  | 0.76954300  | 3.17223100  |

|   |             |             |             |
|---|-------------|-------------|-------------|
| H | 3.59437600  | 1.22822400  | 3.72539600  |
| H | 5.01062700  | 0.14046600  | 1.67647400  |
| H | -0.60424700 | 0.13446100  | 1.99711400  |
| H | -1.43124400 | -2.60676400 | 0.94630700  |
| H | -0.53899500 | -2.28571900 | 2.43891400  |
| H | -2.17793900 | -1.66598600 | 2.24515400  |
| H | -1.52144600 | -0.44455500 | -0.82535200 |
| H | -4.69800900 | 1.03020100  | 1.42861200  |
| H | -3.12398900 | 2.00400300  | 1.49184100  |
| H | -1.24502700 | 1.16312800  | -2.38996300 |
| H | -0.45205800 | 3.41594800  | -3.07586000 |
| H | 0.07023400  | 4.48648000  | 1.02763600  |
| H | -0.70968300 | 2.25086800  | 1.72663300  |
| H | -5.93385700 | -2.19518800 | -1.05127000 |
| H | -5.37303300 | -3.14454700 | 0.34354300  |
| H | -6.80977300 | -2.08779400 | 0.50675700  |

**(R,R)-3a-4**

|   |             |             |             |
|---|-------------|-------------|-------------|
| C | 2.17394800  | 1.01256600  | 0.72193100  |
| N | 3.32684600  | 0.68194200  | 0.02081800  |
| B | 3.46413500  | -0.58459500 | -0.85251100 |
| N | 2.47279700  | -1.59665300 | -0.22982200 |
| C | 1.31761000  | -1.24159900 | 0.46874300  |
| C | 1.13452200  | 0.07921900  | 0.90594300  |
| C | 2.45706500  | -2.91151900 | -0.43663700 |
| C | 1.29846100  | -3.47557700 | 0.11914000  |
| C | 0.57996700  | -2.43576900 | 0.67746600  |
| C | 2.34503900  | 2.32952400  | 1.21129100  |
| C | 3.59650000  | 2.76441500  | 0.80689600  |
| C | 4.16556700  | 1.71907500  | 0.06759400  |
| C | -0.10983900 | 0.55231900  | 1.62798000  |
| F | 3.07103600  | -0.29367700 | -2.15437400 |
| F | 4.75276000  | -1.07458700 | -0.81948300 |
| C | -0.35585600 | -0.21581200 | 2.93511300  |
| C | -1.42039700 | 0.69908800  | 0.77010800  |
| C | -1.30929700 | 1.74962100  | -0.32114900 |
| C | -2.07902600 | -0.58895600 | 0.29228400  |
| C | -0.39362800 | 1.79788800  | -1.28976000 |
| C | -2.95275000 | -1.25812200 | 1.15524500  |
| C | -3.57108300 | -2.44710300 | 0.78885100  |
| C | -3.31944500 | -2.95822600 | -0.47183700 |
| C | -2.48253800 | -2.31700600 | -1.36651800 |
| C | -1.86837000 | -1.13380800 | -0.97568000 |
| F | -3.91723100 | -4.10545400 | -0.84223800 |
| C | -2.36724300 | 2.80893200  | -0.25771000 |

|   |             |             |             |
|---|-------------|-------------|-------------|
| O | -3.18294800 | 2.89882700  | 0.63723800  |
| O | -2.33016000 | 3.66054600  | -1.28796100 |
| C | -3.31192300 | 4.70163700  | -1.26717600 |
| H | 3.26274500  | -3.39290300 | -0.97329200 |
| H | 1.03478600  | -4.52248200 | 0.10955100  |
| H | -0.36656900 | -2.51829500 | 1.18540200  |
| H | 1.64302800  | 2.88655300  | 1.81315900  |
| H | 4.05948900  | 3.71629100  | 1.01994800  |
| H | 5.12503900  | 1.67353000  | -0.42832800 |
| H | 0.09559000  | 1.57918100  | 1.92937000  |
| H | -0.68457600 | -1.24142800 | 2.77704600  |
| H | 0.55723100  | -0.24300100 | 3.53417400  |
| H | -1.12512200 | 0.29712100  | 3.51827300  |
| H | -2.12077600 | 1.12601500  | 1.49152800  |
| H | -0.41256000 | 2.59270500  | -2.02480800 |
| H | 0.39621000  | 1.06347200  | -1.38832300 |
| H | -3.16271400 | -0.83908900 | 2.13401000  |
| H | -4.24925300 | -2.96560900 | 1.45647000  |
| H | -2.31899500 | -2.74188100 | -2.34995600 |
| H | -1.22083700 | -0.62907500 | -1.68163400 |
| H | -4.31730800 | 4.27792900  | -1.27151400 |
| H | -3.19067700 | 5.32401600  | -0.37911400 |
| H | -3.14083300 | 5.28665000  | -2.16844100 |

**(R,R)-3a-5**

|   |             |             |             |
|---|-------------|-------------|-------------|
| C | 1.69109500  | -0.73604100 | 1.24406900  |
| N | 2.98656100  | -0.30473000 | 1.49813900  |
| B | 3.99565400  | 0.13151200  | 0.41507600  |
| N | 3.46067300  | -0.50063300 | -0.89527000 |
| C | 2.14815700  | -0.91579800 | -1.12841700 |
| C | 1.23279700  | -0.98686600 | -0.06527000 |
| C | 4.14726800  | -0.59283400 | -2.03188200 |
| C | 3.32238200  | -1.07503100 | -3.05828800 |
| C | 2.07417300  | -1.27446200 | -2.50113700 |
| C | 1.06338800  | -0.93153900 | 2.49727500  |
| C | 1.98527900  | -0.61593700 | 3.48074800  |
| C | 3.15883900  | -0.23056800 | 2.81957700  |
| C | -0.24239900 | -1.33651400 | -0.20536700 |
| F | 4.01658300  | 1.51302600  | 0.30119300  |
| F | 5.25792600  | -0.35341500 | 0.69980500  |
| C | -0.66873300 | -2.15360400 | -1.42836900 |
| C | -1.14003800 | -0.08023700 | 0.08778600  |
| C | -0.90597200 | 1.17275800  | -0.73192000 |
| C | -2.61601100 | -0.46491600 | 0.10323200  |
| C | -0.37547200 | 1.26748900  | -1.94936900 |

|   |             |             |             |
|---|-------------|-------------|-------------|
| C | -3.17586600 | -0.98528800 | 1.27179600  |
| C | -4.50615400 | -1.37933700 | 1.32379600  |
| C | -5.27936100 | -1.24082500 | 0.18441200  |
| C | -4.76642300 | -0.72380800 | -0.99101800 |
| C | -3.43140900 | -0.33772400 | -1.02156100 |
| F | -6.57163000 | -1.61495600 | 0.22433000  |
| C | -1.34936000 | 2.41670400  | -0.02213500 |
| O | -1.70129000 | 2.43943200  | 1.13855900  |
| O | -1.31776900 | 3.50960300  | -0.79251500 |
| C | -1.69759600 | 4.72978900  | -0.14808400 |
| H | 5.19016400  | -0.31048300 | -2.06839000 |
| H | 3.62105500  | -1.26309100 | -4.07862200 |
| H | 1.21372300  | -1.66474700 | -3.01623900 |
| H | 0.05952100  | -1.29462400 | 2.65995400  |
| H | 1.84620100  | -0.66557500 | 4.55025000  |
| H | 4.10420900  | 0.08981500  | 3.23435400  |
| H | -0.44693600 | -1.99175300 | 0.64608200  |
| H | -0.74548500 | -1.57194700 | -2.34688600 |
| H | 0.01770700  | -2.98513800 | -1.59691600 |
| H | -1.65688100 | -2.57412000 | -1.23960600 |
| H | -0.90066900 | 0.21656300  | 1.11000100  |
| H | -0.26450600 | 2.23301300  | -2.42620300 |
| H | -0.02080800 | 0.40718200  | -2.49789800 |
| H | -2.56592300 | -1.07557400 | 2.16572200  |
| H | -4.94767600 | -1.77828000 | 2.22953600  |
| H | -5.40659500 | -0.62513700 | -1.85993300 |
| H | -3.02297300 | 0.07696000  | -1.93663800 |
| H | -2.72322100 | 4.66403000  | 0.21826500  |
| H | -1.03202700 | 4.94221100  | 0.68998600  |
| H | -1.61272700 | 5.50403100  | -0.90782900 |

**(R,R)-3a-6**

|   |             |             |             |
|---|-------------|-------------|-------------|
| C | 1.23778200  | 1.73530400  | 0.10416900  |
| N | 2.55136700  | 1.85392300  | -0.33179300 |
| B | 3.62322900  | 0.75101600  | -0.21178000 |
| N | 3.07466400  | -0.22598500 | 0.85716700  |
| C | 1.73969200  | -0.33941800 | 1.25123100  |
| C | 0.80341400  | 0.62852200  | 0.85625000  |
| C | 3.76593900  | -1.22365900 | 1.40455400  |
| C | 2.92100200  | -2.03217900 | 2.17848700  |
| C | 1.65523300  | -1.48812100 | 2.08079700  |
| C | 0.54900900  | 2.89728200  | -0.31466400 |
| C | 1.45481600  | 3.69679100  | -0.99160900 |
| C | 2.67771600  | 3.01372100  | -0.98138700 |
| C | -0.68438700 | 0.54668400  | 1.15759100  |



|   |             |             |             |
|---|-------------|-------------|-------------|
| F | 3.76925900  | 0.07690800  | -1.42219900 |
| F | 4.83392000  | 1.28099800  | 0.18958700  |
| C | -1.07032900 | -0.08199800 | 2.49906600  |
| C | -1.43155000 | -0.08433300 | -0.07543100 |
| C | -0.93666000 | -1.49559000 | -0.33426300 |
| C | -2.95280900 | 0.06309400  | -0.02013400 |
| C | -1.42344300 | -2.60348200 | 0.22254900  |
| C | -3.58217200 | 1.06366300  | 0.72465700  |
| C | -4.95951600 | 1.25137600  | 0.68166300  |
| C | -5.71692800 | 0.42945300  | -0.12949000 |
| C | -5.13706300 | -0.56300000 | -0.89829500 |
| C | -3.76098200 | -0.73508200 | -0.83742900 |
| F | -7.05112500 | 0.60032000  | -0.17551300 |
| C | 0.19405900  | -1.57996100 | -1.31272600 |
| O | 0.44909300  | -0.70064400 | -2.10937100 |
| O | 0.89550300  | -2.71169000 | -1.22523200 |
| C | 2.01334700  | -2.80730000 | -2.12232000 |
| H | 4.82631000  | -1.32448400 | 1.21915500  |
| H | 3.21721900  | -2.90384100 | 2.74251100  |
| H | 0.76966800  | -1.86118900 | 2.56357700  |
| H | -0.48961500 | 3.12789100  | -0.12885300 |
| H | 1.27177200  | 4.66290100  | -1.43751200 |
| H | 3.62682000  | 3.30517600  | -1.40893700 |
| H | -1.01197600 | 1.58607800  | 1.19712600  |
| H | -1.07965400 | -1.17067800 | 2.46157100  |
| H | -0.38864300 | 0.23185600  | 3.29184700  |
| H | -2.07584600 | 0.23343400  | 2.77877100  |
| H | -1.10069800 | 0.49897000  | -0.94000000 |
| H | -0.98911400 | -3.57240000 | 0.00863100  |
| H | -2.28159200 | -2.57345000 | 0.88491800  |
| H | -3.00697300 | 1.72880600  | 1.35699500  |
| H | -5.44182800 | 2.02543400  | 1.26697500  |
| H | -5.75687200 | -1.18518500 | -1.53341700 |
| H | -3.30904000 | -1.50929400 | -1.44530300 |
| H | 2.50648300  | -3.74517800 | -1.87443400 |
| H | 1.66859100  | -2.82139100 | -3.15770300 |
| H | 2.68434200  | -1.96006800 | -1.97428400 |

[S1] O.V. Dolomanov, L.J. Bourhis, R.J. Gildea, J.A.K. Howard and H. Puschmann. *J. Appl. Cryst.* 2009,42, 339-341.

[S2] G.M. Sheldrick. *Acta Cryst.* 2015, A71, 3-8.

[S3] G.M. Sheldrick. *G.M. Acta Cryst.* 2015, C71, 3-8.

[S4] A. M. Brouwer. Standards for photoluminescence quantum yield measurements in solution (IUPAC Technical Report). *Pure Appl. Chem.* 2011, 83, 2213–2228, doi:10.1351/pac-rep-10-09-31.

[S5] Gaussian 09, Revision B.01, M. J. Frisch, G. W. Trucks, H. B. Schlegel, G. E. Scuseria, M. A. Robb, J. R. Cheeseman, G. Scalmani, V. Barone, B. Mennucci, G. A. Petersson, H. Nakatsuji, M. Caricato, X. Li, H. P. Hratchian, A. F. Izmaylov, J. Bloino, G. Zheng, J. L. Sonnenberg, M. Hada, M. Ehara, K. Toyota, R. Fukuda, J. Hasegawa, M. Ishida, T. Nakajima, Y. Honda, O. Kitao, H. Nakai, T. Vreven, J. A. Montgomery, Jr., J. E. Peralta, F. Ogliaro, M. Bearpark, J. J. Heyd, E. Brothers, K. N. Kudin, V. N. Staroverov, T. Keith, R. Kobayashi, J. Normand, K. Raghavachari, A. Rendell, J. C. Burant, S. S. Iyengar, J. Tomasi, M. Cossi, N. Rega, J. M. Millam, M. Klene, J. E. Knox, J. B. Cross, V. Bakken, C. Adamo, J. Jaramillo, R. Gomperts, R. E. Stratmann, O. Yazyev, A. J. Austin, R. Cammi, C. Pomelli, J. W. Ochterski, R. L. Martin, K. Morokuma, V. G. Zakrzewski, G. A. Voth, P. Salvador, J. J. Dannenberg, S. Dapprich, A. D. Daniels, O. Farkas, J. B. Foresman, J. V. Ortiz, J. Cioslowski, and D. J. Fox, Gaussian, Inc., Wallingford CT, 2016.

[S6] T. Bruhn, A. Schaumlöffel, Y. Hemberger, G. Prescitelli, SpecDis, Version 1.71, Berlin, Germany, 2017.
